# Supplementary material for: Highly accurate assembly polishing with DeepPolisher
Source: HighWire-hosted journal article supplement (doi:10.1101/gr.280149.124), 2025-05-19
Supplement: Supplemental_Figures.docx [file Supplemental_Figures.docx]

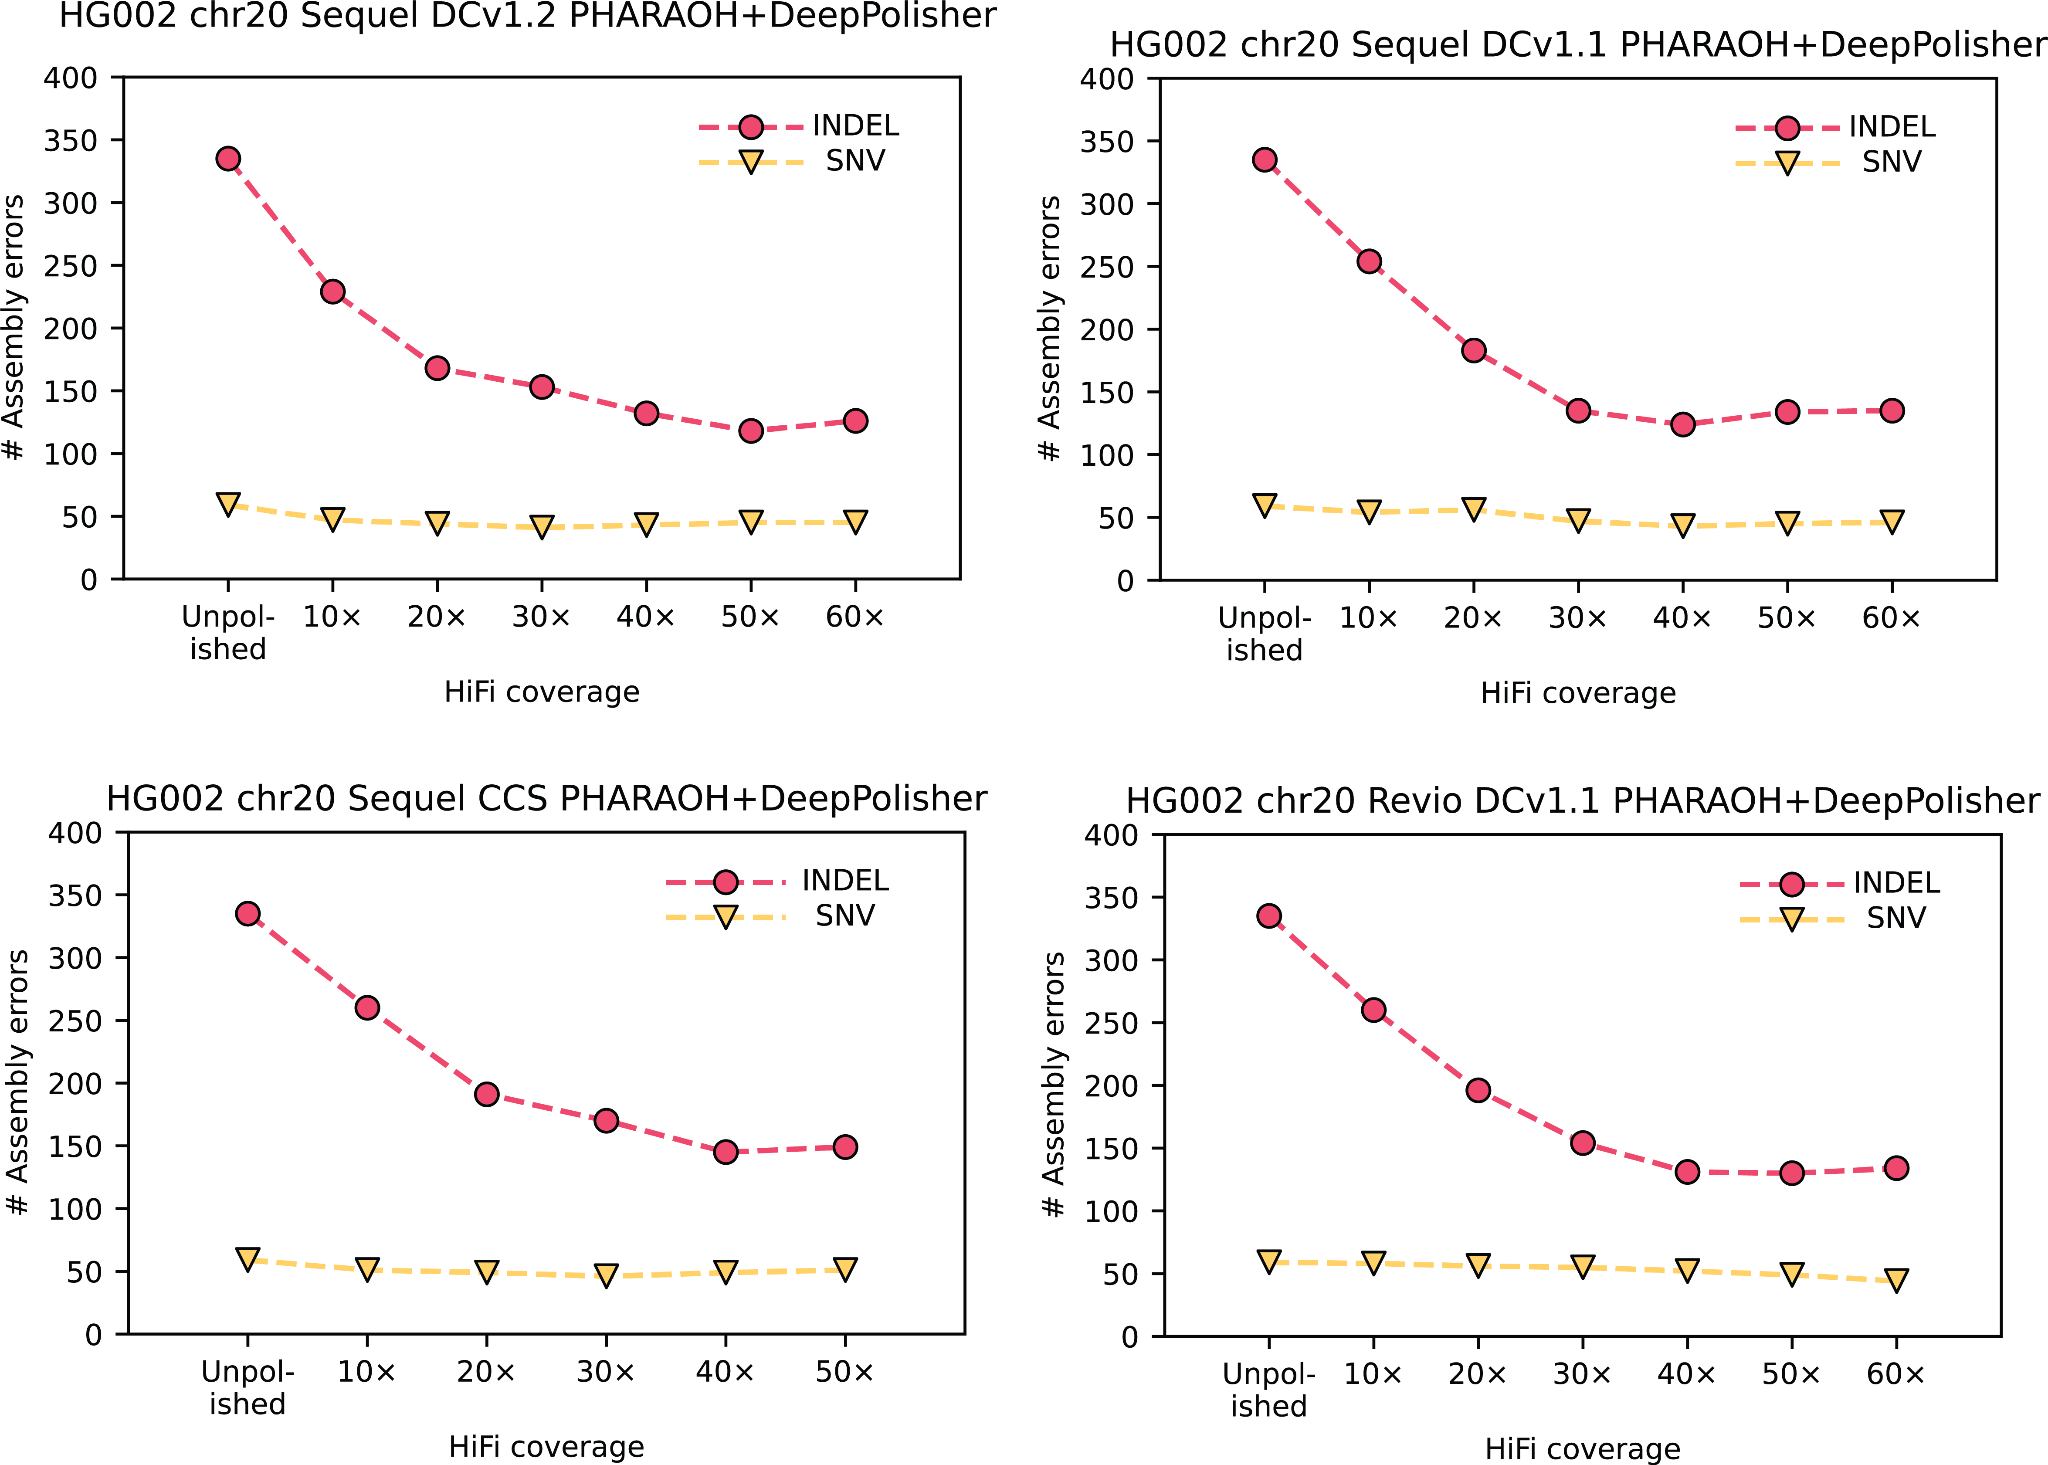


**________________________________________________________________________________________________________**

**Supplementary Figure 1: HG002 Chr20 GIAB variant calling performance for other HiFi read versions, across different coverages.** Total GIAB variant calling (assembly) errors for different HiFi read coverages, with indel errors represented in pink circles and SNV errors in yellow triangles

**________________________________________________________________________________________________________**


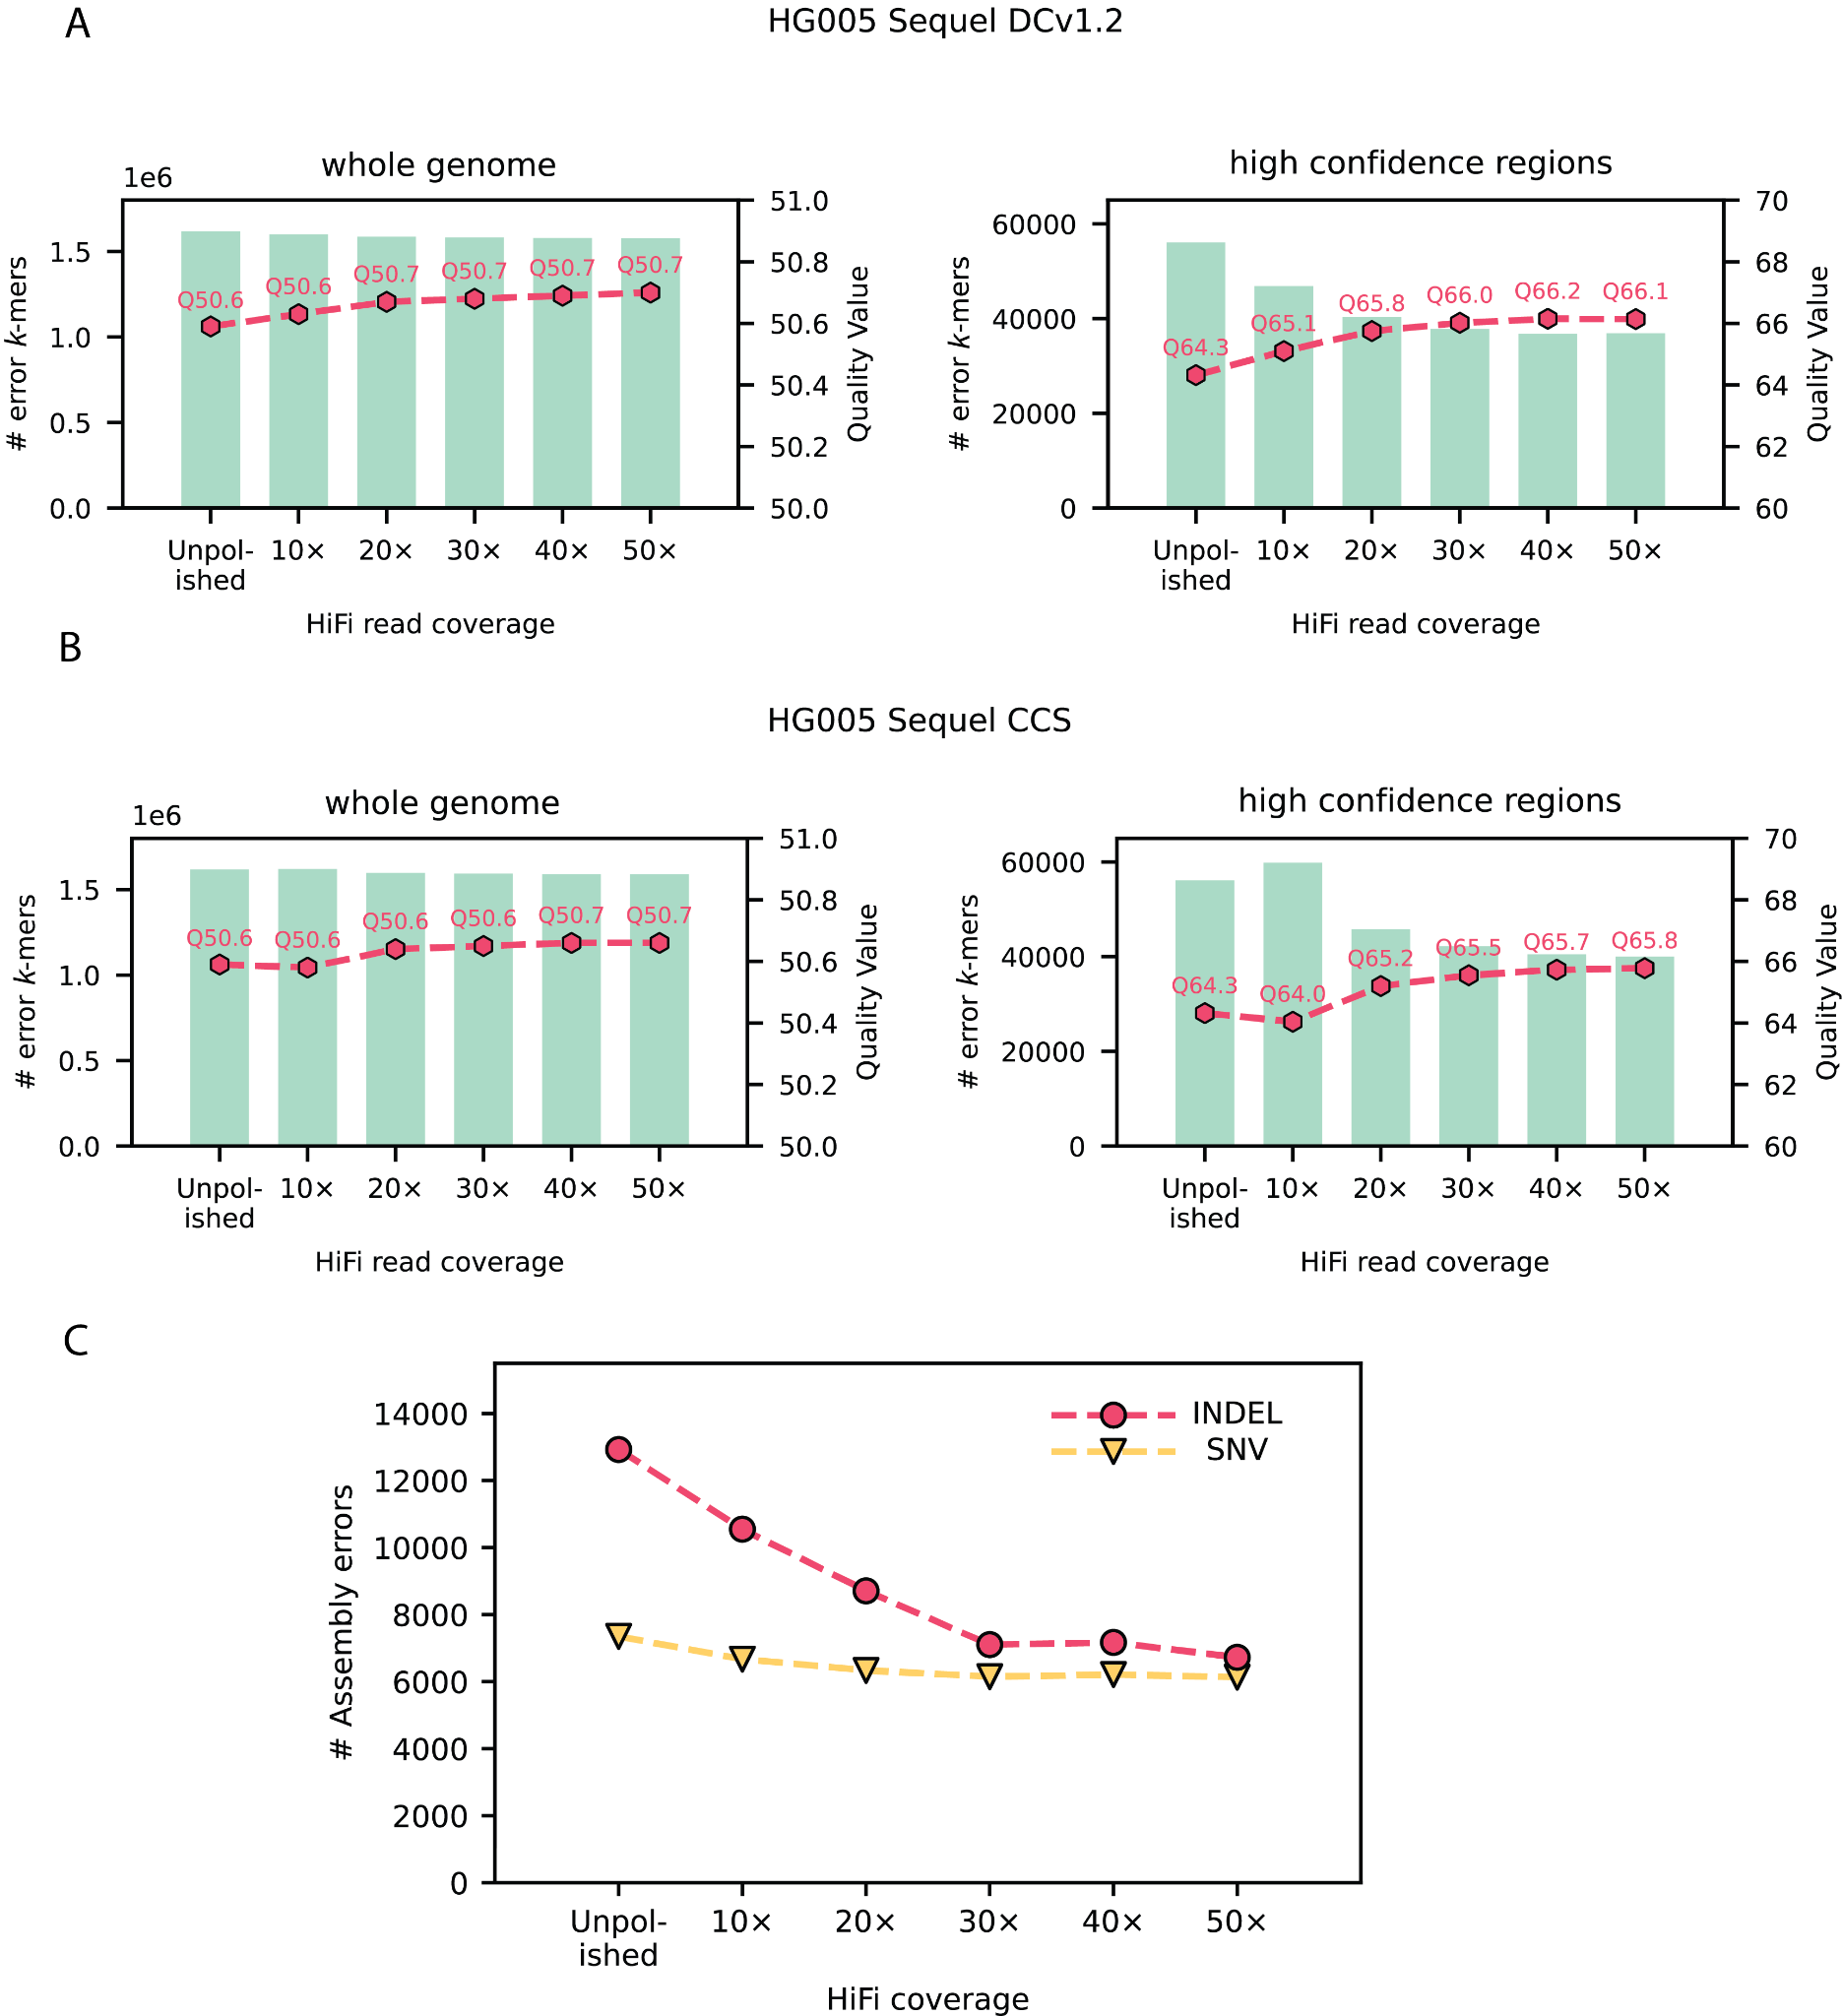


**________________________________________________________________________________________________________**

**Supplementary Figure 2: HG005 data performance across multiple coverages and read technologies. A)** Bar plots represent number of error *k*-mers (left y axis) for HiFi Sequel DCv1.2 at different read coverages, with the corresponding QV plotted on the right y axis for whole genome (left panel) andfor the confidence regions (right panel) **B)** The same for HiFi Sequel CCS data. **C)** Total GIAB variant calling (assembly) errors for different HiFi read coverages, with indel errors represented in pink circles and SNV errors in yellow triangles **________________________________________________________________________________________________________**


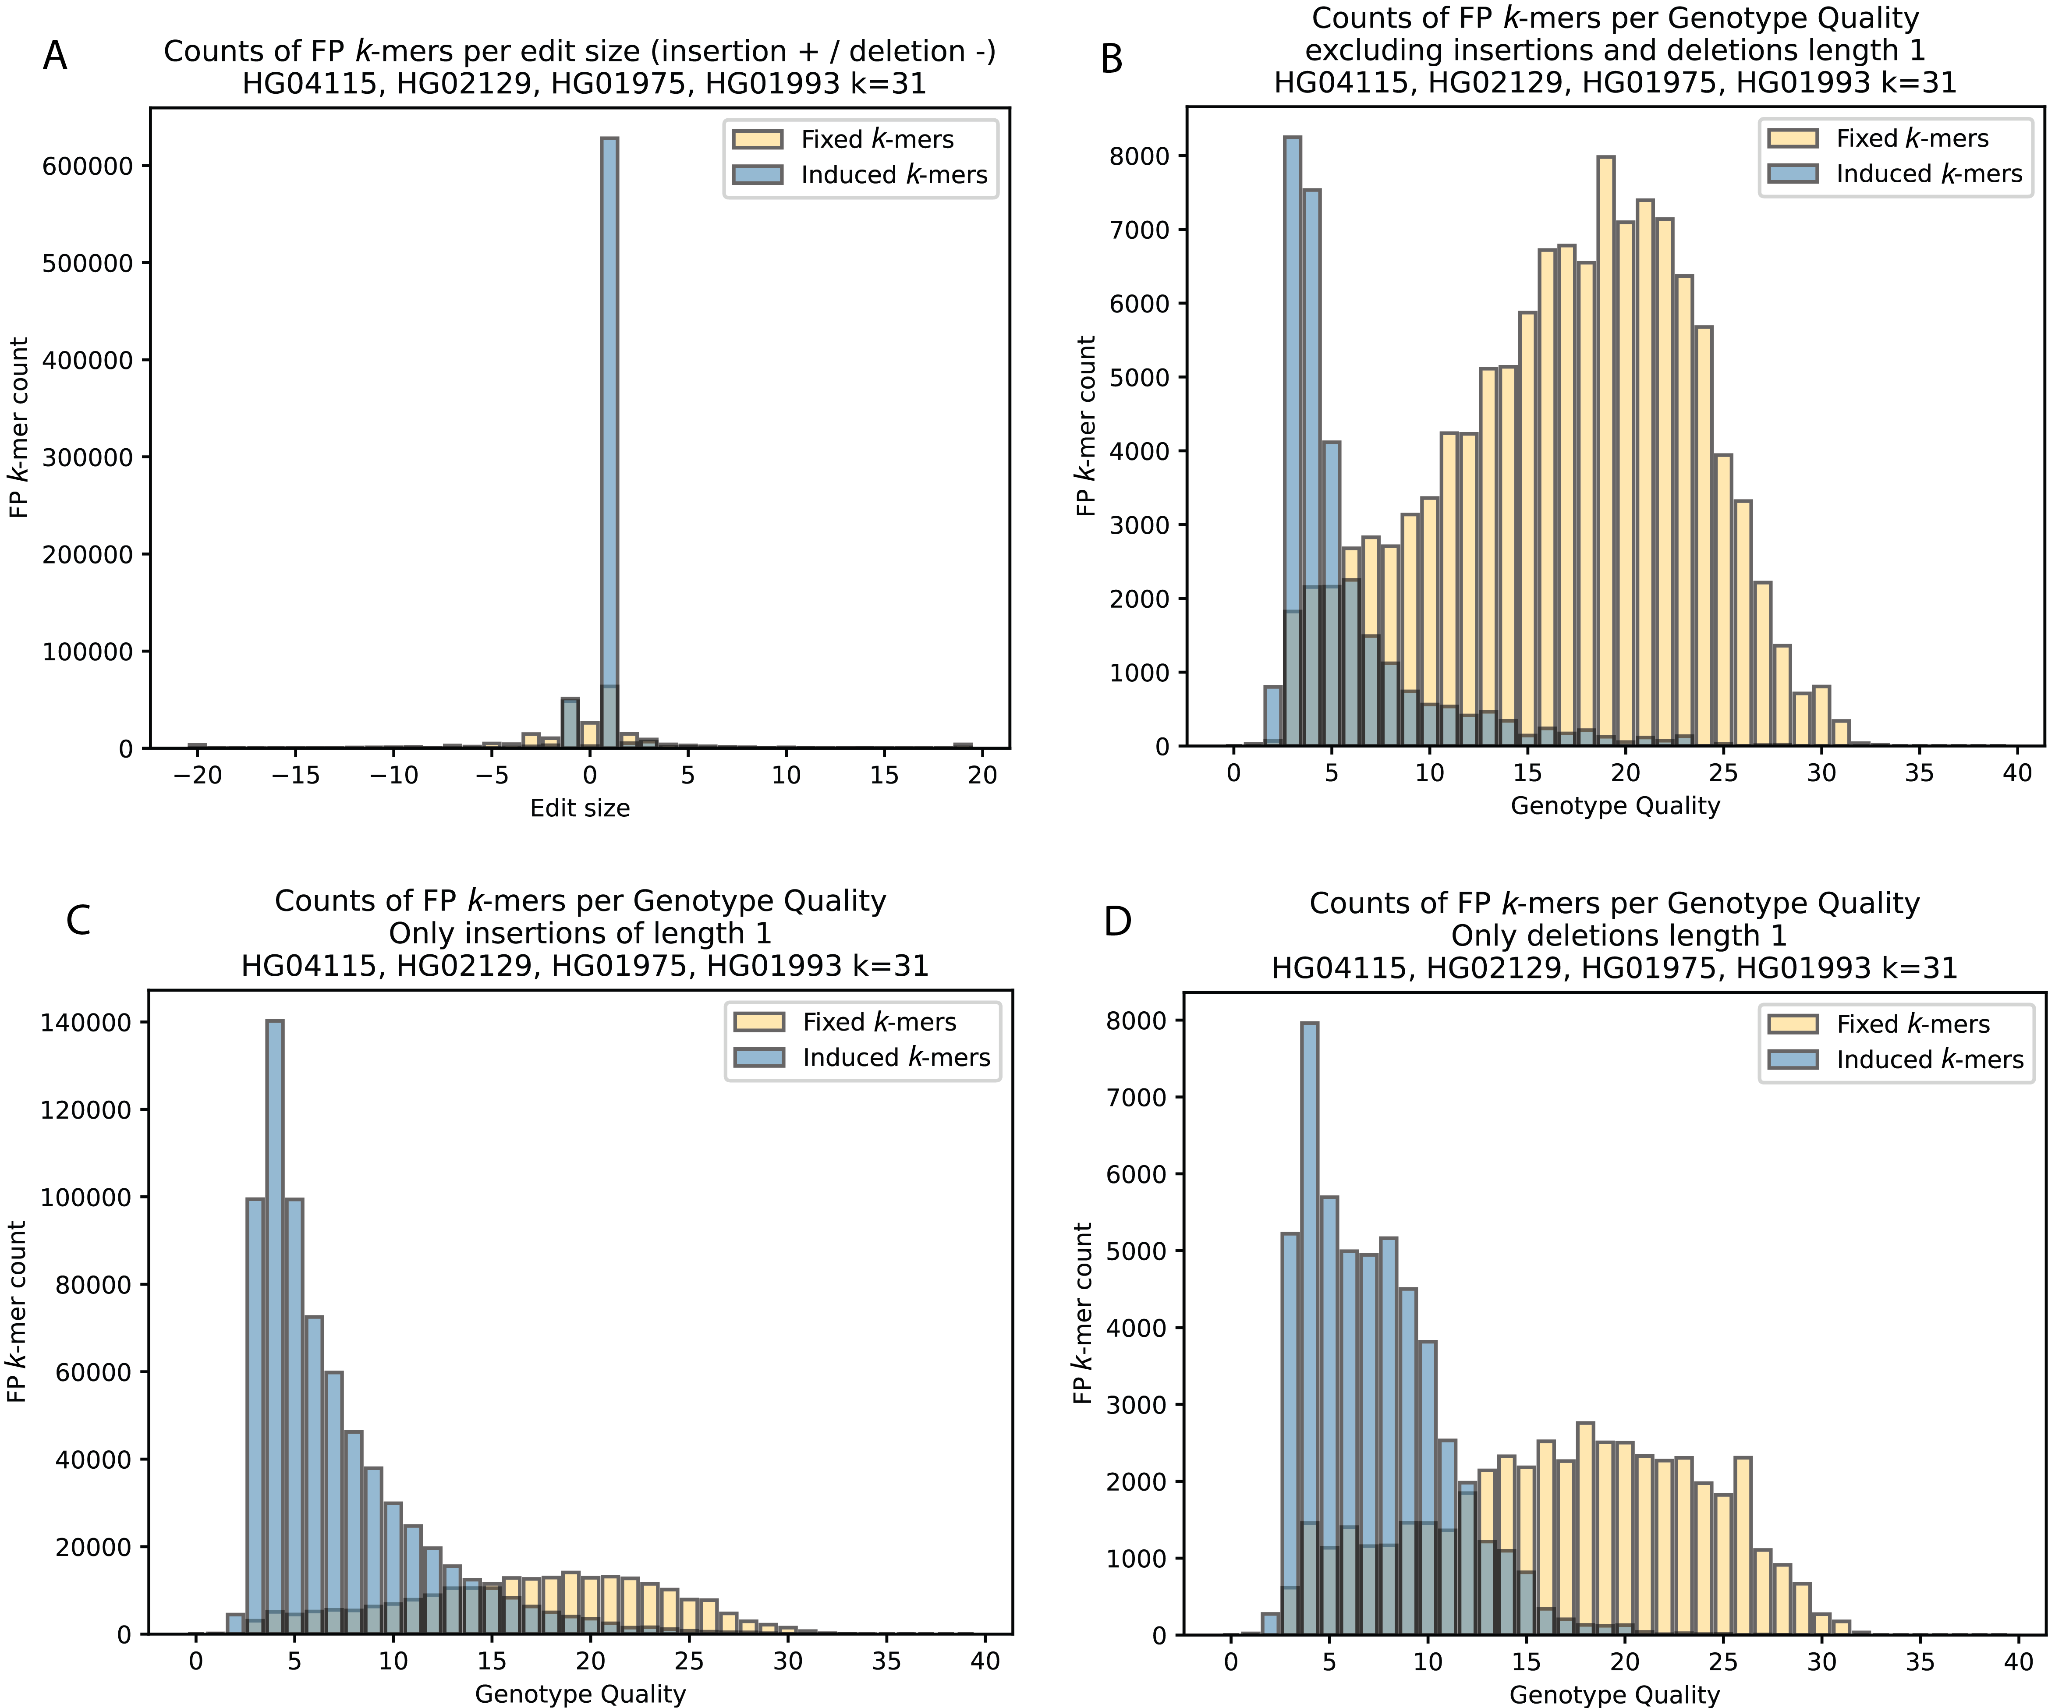


**________________________________________________________________________________________________________**

**Supplementary Figure 3: Optimizing GQ filters for DeepPolisher**

**A)** Count of error (FP) *k-*mers per polishing edit size, with error *k*-mers fixed by polishing edit in yellow and error *k*-mers induced by polishing edit in blue. **B)** Counts of error (FP) *k*-mers per genotype quality of polishing edit, excluding insertions and deletions of length 1, and for **C**) the same for only insertions of length 1, and **D)** for deletions of length 1. **________________________________________________________________________________________________________**


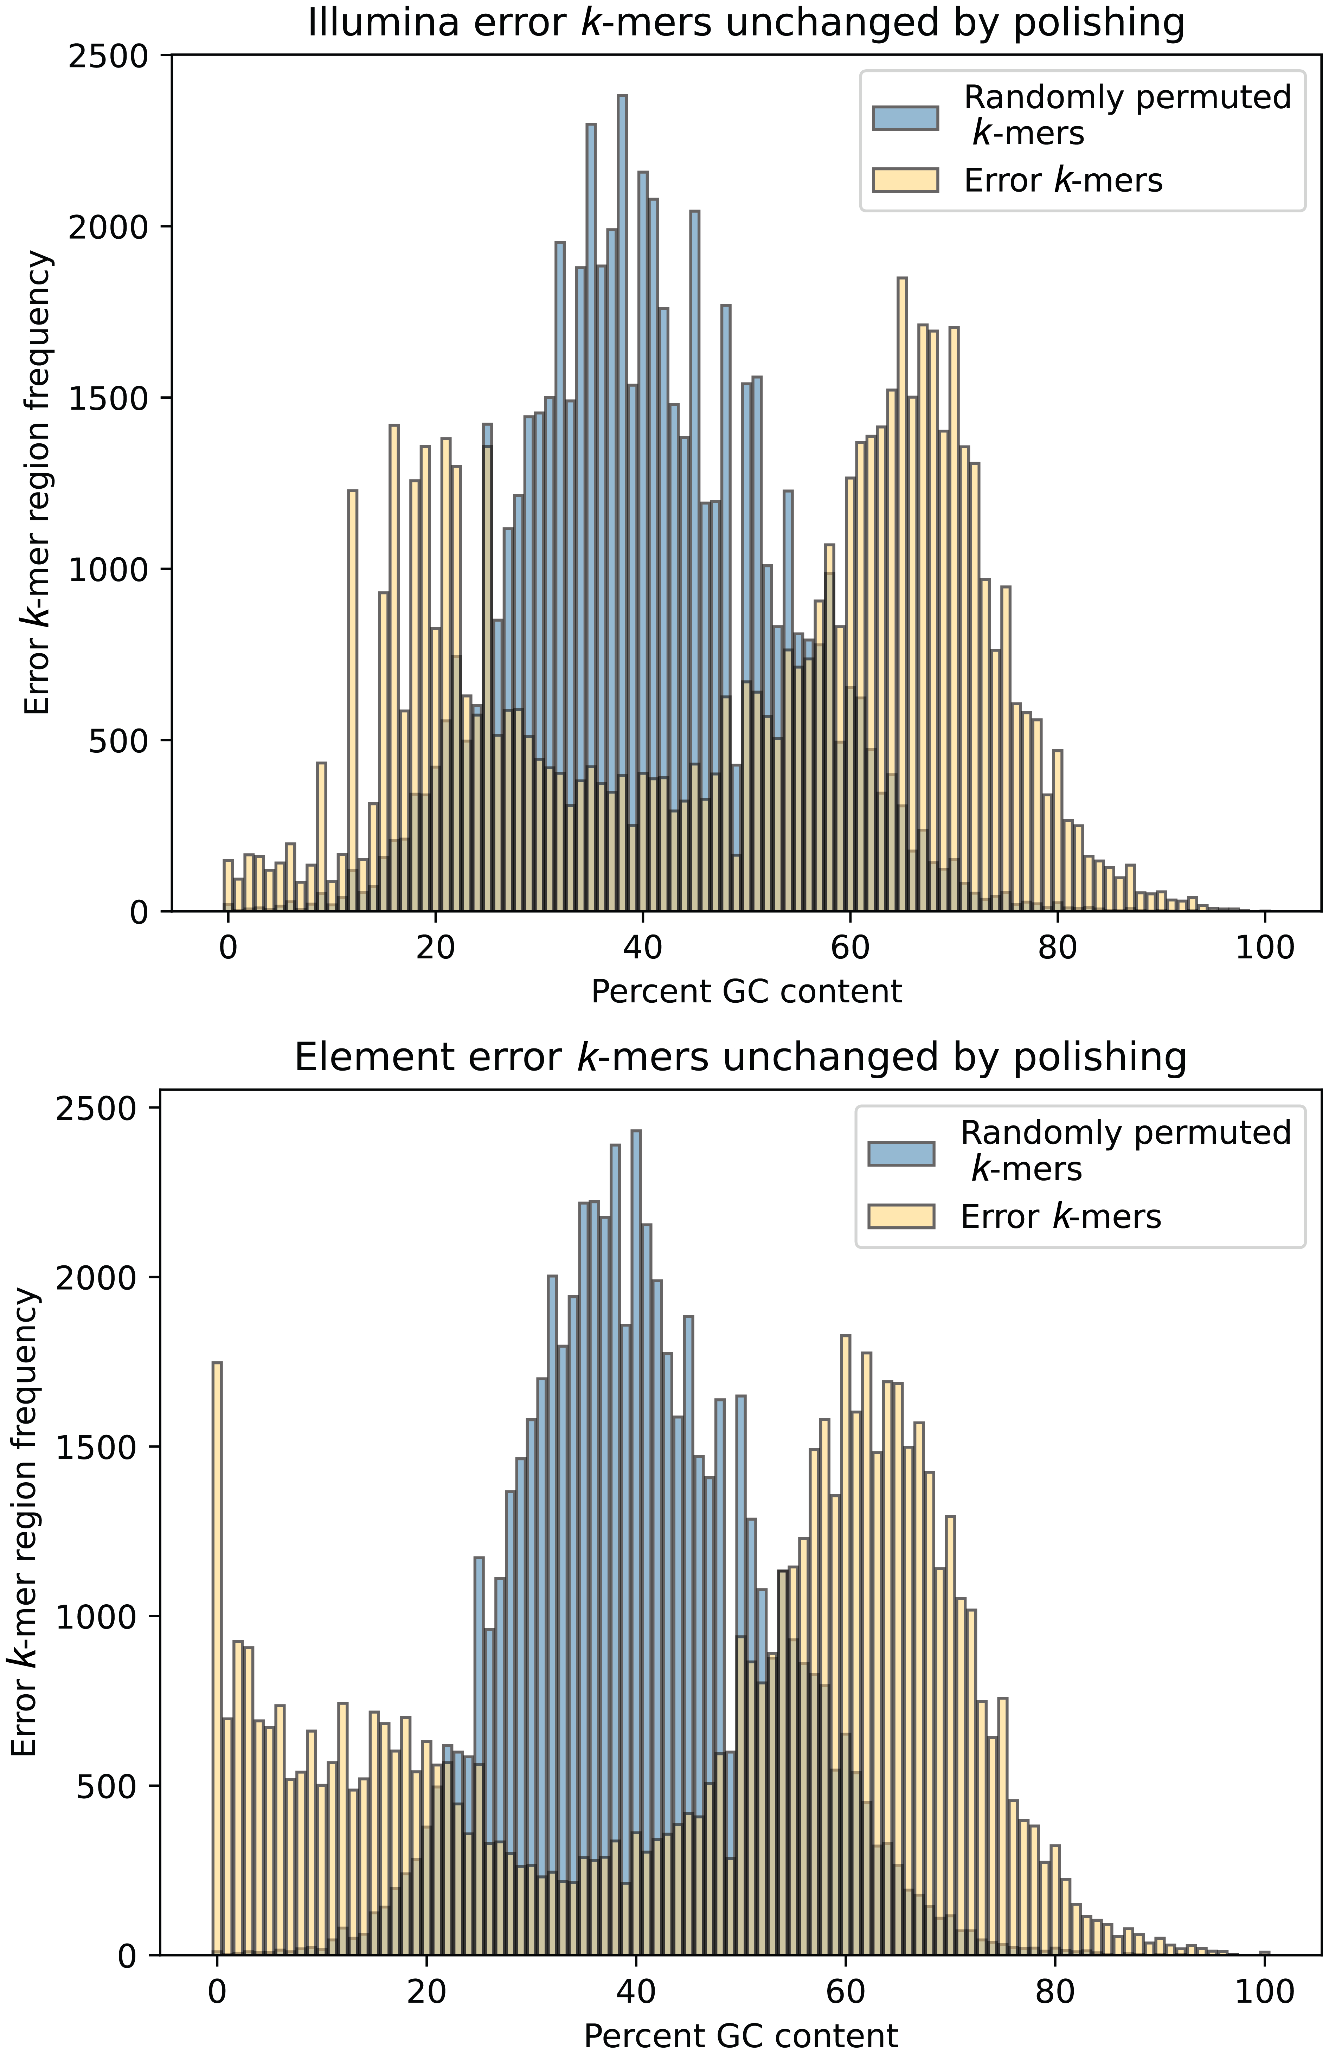


**________________________________________________________________________________________________________**

**Supplementary Figure 4: Percent GC content of error *k*-mers unchanged by polishing and randomly permuted *k*-mers.** Frequency of merged error *k*-mer regions per varying GC contents. In yellow shows the actual observed error *k*-mers produced by Merqury, in blue are randomly permuted *k*-mers of the same size across the genome. Top panel is for Illumina, bottom panel for Element cloudbreak.

**_________________________________________________________________________________**
