# Supplementary material for: Highly accurate assembly polishing with DeepPolisher
Source: HighWire-hosted journal article supplement (doi:10.1101/gr.280149.124), 2025-05-19
Supplement: Supplemental_Tables.xlsx [file Supplemental_Tables.xlsx]

## Sheet: 1. computational performance
Job	# CPUs requested	CPU time	Job Wall-clock time	Maximum memory	Maximum Disk
PHARAOH	32	7-15:18:53	13:03:45	81.28 GB	4.6 TB
DeepPolisher	32	7-19:23:44	05:51:22	9.43 MB	3.0 GB
DeepVariant - HiFi	32	9-06:49:06	06:49:47	17.9 GB	17 GB
NextPolish2	32	1-04:30:14	00:54:48	262.41 GB	5.6 GB
T2T pipeline - DeepVariant hybrid	32	4-01:30:04	02:50:26	14.715468 GB	39 GB
T2T pipeline - Pepper-Margin-DeepVariant	32	28-12:53:45	1-00:16:05	34.02 GB	447 GB

## Sheet: 2. Variant calling performance 
Assembly	Reads	Polisher	Polisher Filter	Type	TRUTH TOTAL	TRUTH TP	TRUTH FN	QUERY TOTAL	QUERY FP	FP.gt	FP.al	METRIC Recall	METRIC Precision	METRIC F1_Score	FP+FN	Total Errors	Final bed size in Mb used for hap.py	# Errors / Mb	# polishing edits
A. HG002 and HG005 unpolished assemblies
HG002 Hifiasm v0.19.5 chr20	None	None	None	INDEL	11180	11013	167	21665	168	95	28	0.985063	0.985439	0.985251	335	394	55.625881	7.08303	0
				SNP	70896	70881	15	83356	44	7	1	0.999788	0.999381	0.999585	59
HG005 Hifiasm v0.19.5 whole genome	None	None	None	INDEL	414717	407889	6828	960776	6097	3966	946	0.983536	0.985639	0.984586	12925	20274	2490	8.14217	0
				SNP	3252095	3249307	2788	3785567	4561	1136	215	0.999143	0.9986	0.998871	7349
																0
B. HG002 and HG005 with hprc polishing pipeline
HG002 Hifiasm v0.19.5 chr20	HiFi DC v1.2 40x , PHARAOH v6 (minimap2) with 40x UL	DeepPolisher minimap2 model 1	GQ 20 INS-1, GQ 12 DEL-1, GQ 5 all other	INDEL	11180	11127	53	21704	79	27	15	0.995259	0.993178	0.994218	132	175	55.625881	3.14602	272
				SNP	70896	70892	4	82838	39	3	1	0.999944	0.999451	0.999697	43
HG005 Hifiasm v0.19.5 whole genome	HiFi DC v1.2 40x , PHARAOH v6 (minimap2) with 40x UL	DeepPolisher minimap2 model 1	GQ 20 INS-1, GQ 12 DEL-1, GQ 5 all other	INDEL	414717	412052	2665	965354	3164	1592	708	0.993574	0.992578	0.993076	5829	11750	2490	4.71888	16376
				SNP	3252095	3250063	2032	3791678	3889	729	149	0.999375	0.998806	0.999091	5921
C. Alternate polishing methods
HG002 Hifiasm v0.19.5 chr20	HiFi DC v1.2 winnowmap 40x, ONT R9 winnowmap 40x , Illumina bwa-mem 40x	T2T pipeline	merfin -polish	INDEL	11180	11025	155	21625	160	88	28	0.986136	0.986138	0.986137	315	372	55.625881	6.68753	37
				SNP	70896	70881	15	82818	42	8	1	0.999788	0.999409	0.999599	57
	HiFi DC v1.2 winnowmap 40x	DeepVariant HiFi	PASS, homalt only (-H1)	INDEL	11180	11131	49	21695	56	29	10	0.995617	0.995156	0.995387	105	150	55.625881	2.69659	978
				SNP	70896	70888	8	82817	37	4	0	0.999887	0.999479	0.999683	45
	HiFi DC v1.2 winnowmap 40x	NextPolish2	None	INDEL	11180	10761	419	21301	281	232	36	0.962522	0.975316	0.968877	700	752	55.625881	13.5189	NA
				SNP	70896	70885	11	82811	41	9	0	0.999845	0.999423	0.999634	52
HG005 Hifiasm v0.19.5 whole genome	HiFi DC v1.2 winnowmap 40x, ONT R9 winnowmap 40x , Illumina bwa-mem 40x	T2T pipeline	merfin -polish	INDEL	414717	407994	6723	961064	5900	3922	895	0.983789	0.9861	0.984943	12623	19902	2490	7.99277	3591
				SNP	3252095	3249334	2761	3790719	4518	1100	215	0.999151	0.998613	0.998882	7279
	HiFi DC v1.2 winnowmap 40x	DeepVariant HiFi	PASS, homalt only (-H1)	INDEL	414717	411112	3605	965241	3651	2120	590	0.991307	0.991424	0.991366	7256	13724	2490	5.51165	17210
				SNP	3252095	3249796	2299	3791167	4169	862	170	0.999293	0.99872	0.999007	6468
	HiFi DC v1.2 40x , PHARAOH v6 (minimap2) with 40x UL	DeepVariant HiFi	PASS, homalt only (-H1)	INDEL	414717	412371	2346	966556	2967	1422	657	0.994343	0.993042	0.993692	5313	11508	2490	4.62169	18100
				SNP	3252095	3249977	2118	3791870	4077	776	163	0.999349	0.998748	0.999048	6195
	HiFi DC v1.2 winnowmap 40x	NextPolish2	NA	INDEL	414717	409226	5491	959172	4510	3310	592	0.98676	0.989375	0.988065	10001	16642	2490	6.68353	NA
				SNP	3252095	3249581	2514	3790968	4127	948	136	0.999227	0.998733	0.99898	6641
D. HG002 and HG005 minimap2 model without GQ filters
HG002 Hifiasm v0.19.5 chr20	HiFi DC v1.2 40x , PHARAOH v6 (minimap2) with 40x UL	DeepPolisher minimap2 model 1	None	INDEL	11180	11162	18	21775	56	9	13	0.99839	0.99517	0.996777	74	118	55.625881	2.12131	549
				SNP	70896	70892	4	82829	40	3	2	0.999944	0.999437	0.99969	44
HG005 Hifiasm v0.19.5 whole genome	HiFi DC v1.2 40x , PHARAOH v6 (minimap2) with 40x UL	DeepPolisher minimap2 model 1	None	INDEL	414717	412387	2330	972232	4172	1476	1131	0.994382	0.990243	0.992308	6502	12512	2492	5.02087	40027
				SNP	3252095	3250015	2080	3791721	3930	759	167	0.99936	0.998793	0.999077	6010
E. HG002 and HG005 verkko with verkko model
HG002 verkko v1.4.1 chr20	None	None	None	INDEL	11180	11070	110	21853	158	73	30	0.990161	0.986365	0.988259	268	348	55.625881	6.25608	0
				SNP	70896	70867	29	82914	51	17	1	0.999591	0.999282	0.999437	80
	HiFi DC v1.2 40x , PHARAOH v6 (minimap2) with 40x UL	DeepPolisher verkko model 1	None	INDEL	11180	11127	53	21704	79	27	15	0.995259	0.993178	0.994218	132	175	55.625881	3.14602	272
				SNP	70896	70892	4	82838	39	3	1	0.999944	0.999451	0.999697	43
	HiFi DC v1.2 40x , PHARAOH v6 (minimap2) with 40x UL	DeepPolisher verkko model 1	GQ 20 INS-1, GQ 12 DEL-1, GQ 5 all other	INDEL	11180	11123	57	21873	112	43	21	0.994902	0.990348	0.99262	169	208	55.625881	3.73927
				SNP	70896	70893	3	82923	36	2	0	0.999958	0.999493	0.999725	39
HG005 verkko v1.4.1 whole genome	None	None	None	INDEL	414717	411046	3671	968856	3855	2059	552	0.991148	0.990948	0.991048	7526	17090	2490	6.86345	0
				SNP	3252095	3247060	5035	3790843	4529	1331	148	0.998452	0.998609	0.99853	9564
	HiFi DC v1.2 40x , PHARAOH v6 (minimap2) with 40x UL	DeepPolisher verkko model 1	GQ 20 INS-1, GQ 12 DEL-1, GQ 5 all other	INDEL	414717	412693	2024	970124	2678	1034	517	0.99512	0.993723	0.994421	4702	12115	2490	4.86546	10010
				SNP	3252095	3248469	3626	3791989	3787	618	135	0.998885	0.998837	0.998861	7413
F. HG002 and HG005 hifiasm with winnowmap model
HG002 Hifiasm v0.19.5 chr20	HiFi DC v1.2 40x , PHARAOH v5 (winnowmap) with 40x UL	DeepPolisher winnowmap model 5	None	INDEL	11180	11165	15	21772	54	8	11	0.998658	0.995343	0.996998	69	110	55.625881	1.9775	488
				SNP	70896	70893	3	82835	38	2	0	0.999958	0.999465	0.999711	41
HG005 Hifiasm v0.19.5 whole genome	HiFi DC v1.2 40x , PHARAOH v6 (winnowmap) with 40x UL	DeepPolisher winnowmap model 5	None	INDEL	414717	412864	1853	969477	2978	1161	767	0.995532	0.993025	0.994277	4831	10716	2492	4.30016	32188
				SNP	3252095	3250046	2049	3792175	3836	726	136	0.99937	0.998822	0.999096	5885
G. Polishing without using PHARAOH to create alignments (using GQ filters)
HG002 Hifiasm v0.19.5 whole genome	None	None	None	INDEL	522167	514675	7492	967407	7146	4380	1311	0.985652	0.986775	0.986213	14638	21366	2529.533053	8.44662	0
				SNP	3337495	3335192	2303	3811813	4425	1209	180	0.99931	0.998677	0.998993	6728
HG002 Hifiasm v0.19.5 chr20	HiFi DC v1.2 40x (minimap2)	DeepPolisher minimap2 model 1	GQ 20 INS-1, GQ 12 DEL-1, GQ 5 all other	INDEL	11180	11107	73	21695	97	39	13	0.99347	0.99162	0.992544	170	216	55.625881	3.88308	226
				SNP	70896	70890	6	82830	40	4	0	0.999915	0.999437	0.999676	46
HG002 Hifiasm v0.19.5 whole genome	HiFi DC v1.2 40x (minimap2)	DeepPolisher minimap2 model 1	GQ 20 INS-1, GQ 12 DEL-1, GQ 5 all other	SNP	522167	518227	3940	970933	4435	2375	838	0.992455	0.991813	0.992134	8375	14449	2530	5.71	12164
				INDEL	3337495	3335442	2053	3814795	4021	906	127	0.999385	0.998798	0.999091	6074
HG005 Hifiasm v0.19.5 whole genome	HiFi DC v1.2 40x (minimap2)	DeepPolisher minimap2 model 1	GQ 20 INS-1, GQ 12 DEL-1, GQ 5 all other	INDEL	414717	412632	2085	970164	2747	1075	536	0.994972	0.993561	0.994266	4832	12269	2529.533053	4.8503	12837
				SNP	3252095	3248437	3658	3791937	3779	612	134	0.998875	0.998839	0.998857	7437
E. Polishing without using PHARAOH to create alignments (without using GQ filters)
HG002 Hifiasm v0.19.5 chr20	HiFi DC v1.2 40x (minimap2)	DeepPolisher minimap2 model 1	None	INDEL	11180	11141	39	21762	78	20	13	0.996512	0.993272	0.994889	117	164	55.625881	2.94827	510
				SNP	70896	70890	6	82830	41	4	2	0.999915	0.999423	0.999669	47
HG002 Hifiasm v0.19.5 whole genome	HiFi DC v1.2 40x (minimap2)	DeepPolisher minimap2 model 1	None	SNP	522167	519546	2621	973602	3716	1595	637	0.994981	0.99315	0.994065	6337	12386	2530	4.9	26863
				INDEL	3337495	3335456	2039	3813224	4010	892	137	0.999389	0.998801	0.999095	6049
HG005 Hifiasm v0.19.5 whole genome	HiFi DC v1.2 40x (minimap2)	DeepPolisher minimap2 model 1	None	INDEL	414717	410637	4080	970435	5336	2504	1224	0.990162	0.987497	0.988828	9416	15794	2529.533053	6.24384	34478
				SNP	3252095	3249778	2317	3791916	4061	883	170	0.999288	0.998753	0.99902	6378

## Sheet: 3. Variant calling performance 
Assembly	Reads	Polisher	Polisher Filter	Type	TRUTH TOTAL	TRUTH TP	TRUTH FN	QUERY TOTAL	QUERY FP	FP.gt	FP.al	METRIC Recall	METRIC Precision	METRIC F1_Score	FP+FN	Total Errors	Final bed size in Mb used for hap.py	# Errors / Mb	# polishing edits
HG002 and HG005 unpolished assemblies
HG002 Hifiasm v0.19.5 chr20	None	None	None	INDEL	11180	11013	167	21665	168	95	28	0.985063	0.985439	0.985251	335	394	55.625881	7.08303	0
				SNP	70896	70881	15	83356	44	7	1	0.999788	0.999381	0.999585	59
HG005 Hifiasm v0.19.5	None	None	None	INDEL	414717	407889	6828	960776	6097	3966	946	0.983536	0.985639	0.984586	12925	20274	2490	8.14217	0
				SNP	3252095	3249307	2788	3785567	4561	1136	215	0.999143	0.9986	0.998871	7349
Coverage titration experiments - Sequel DCv1.2, entire PHARAOH pipeline
HG002 Hifiasm v0.19.5 chr20	HiFi DC v1.2 60x , PHARAOH v6 (minimap2) with 40x UL	DeepPolisher minimap2 model 1	GQ 20 INS-1, GQ 12 DEL-1, GQ 5 all other	INDEL	11180	11125	55	21685	71	28	11	0.995081	0.993861	0.994471	126	171	55.625881	3.07411	320
				SNP	70896	70890	6	82825	39	4	0	0.999915	0.999451	0.999683	45
	HiFi DC v1.2 50x , PHARAOH v6 (minimap2) with 40x UL	DeepPolisher minimap2 model 1	GQ 20 INS-1, GQ 12 DEL-1, GQ 5 all other	INDEL	11180	11126	54	21674	64	25	9	0.99517	0.994465	0.994817	118	163	55.625881	2.93029	310
				SNP	70896	70890	6	82828	39	4	0	0.999915	0.999451	0.999683	45
	HiFi DC v1.2 40x , PHARAOH v6 (minimap2) with 40x UL	DeepPolisher minimap2 model 1	GQ 20 INS-1, GQ 12 DEL-1, GQ 5 all other	INDEL	11180	11127	53	21704	79	27	15	0.995259	0.993178	0.994218	132	175	55.625881	3.14602	272
				SNP	70896	70892	4	82838	39	3	1	0.999944	0.999451	0.999697	43
	HiFi DC v1.2 30x , PHARAOH v6 (minimap2) with 40x UL	DeepPolisher minimap2 model 1	GQ 20 INS-1, GQ 12 DEL-1, GQ 5 all other	INDEL	11180	11114	66	21691	87	33	13	0.994097	0.992484	0.99329	153	194	55.625881	3.48759	240
				SNP	70896	70893	3	82830	38	3	0	0.999958	0.999465	0.999711	41
	HiFi DC v1.2 20x , PHARAOH v6 (minimap2) with 40x UL	DeepPolisher minimap2 model 1	GQ 20 INS-1, GQ 12 DEL-1, GQ 5 all other	INDEL	11180	11104	76	21678	92	38	13	0.993202	0.992048	0.992625	168	212	55.625881	3.81118	200
				SNP	70896	70891	5	82829	39	4	0	0.999929	0.999451	0.99969	44
	HiFi DC v1.2 10x , PHARAOH v6 (minimap2) with 40x UL	DeepPolisher minimap2 model 1	GQ 20 INS-1, GQ 12 DEL-1, GQ 5 all other	INDEL	11180	11072	108	21668	121	60	18	0.99034	0.989533	0.989936	229	276	55.625881	4.96172	141
				SNP	70896	70889	7	82823	40	5	0	0.999901	0.999437	0.999669	47
HG005 Hifiasm v0.19.5	HiFi DC v1.2 50x , PHARAOH v6 (minimap2) with 40x UL	DeepPolisher minimap2 model 1	GQ 20 INS-1, GQ 12 DEL-1, GQ 5 all other	INDEL	414717	412221	2496	965604	2996	1481	657	0.993981	0.992973	0.993477	5492	11438	2490	4.59357	17287
				SNP	3252095	3250039	2056	3791743	3890	732	148	0.999368	0.998806	0.999087	5946
	HiFi DC v1.2 40x , PHARAOH v6 (minimap2) with 40x UL	DeepPolisher minimap2 model 1	GQ 20 INS-1, GQ 12 DEL-1, GQ 5 all other	INDEL	414717	412052	2665	965354	3164	1592	708	0.993574	0.992578	0.993076	5829	11750	2490	4.71888	16376
				SNP	3252095	3250063	2032	3791678	3889	729	149	0.999375	0.998806	0.999091	5921
	HiFi DC v1.2 30x , PHARAOH v6 (minimap2) with 40x UL	DeepPolisher minimap2 model 1	GQ 20 INS-1, GQ 12 DEL-1, GQ 5 all other	INDEL	414717	411680	3037	964878	3492	1829	767	0.992677	0.991807	0.992242	6529	12508	2490	5.02329	15352
				SNP	3252095	3250036	2059	3791038	3920	738	149	0.999367	0.998797	0.999082	5979
	HiFi DC v1.2 20x , PHARAOH v6 (minimap2) with 40x UL	DeepPolisher minimap2 model 1	GQ 20 INS-1, GQ 12 DEL-1, GQ 5 all other	INDEL	414717	410970	3747	964326	4128	2241	910	0.990965	0.99031	0.990638	7875	13912	2490	5.58715	13618
				SNP	3252095	3250031	2064	3791073	3973	753	159	0.999365	0.99878	0.999073	6037
	HiFi DC v1.2 10x , PHARAOH v6 (minimap2) with 40x UL	DeepPolisher minimap2 model 1	GQ 20 INS-1, GQ 12 DEL-1, GQ 5 all other	INDEL	414717	409596	5121	963216	5224	3034	1075	0.987652	0.987724	0.987688	10345	16776	2490	6.73735	9152
				SNP	3252095	3249828	2267	3790996	4164	855	185	0.999303	0.998722	0.999012	6431
Coverage titration experiments - Sequel with DCv1.1, entire PHARAOH pipeline
HG002 Hifiasm v0.19.5	HiFi Sequel DC v1.1 60x , PHARAOH v6 (minimap2) with 40x UL	DeepPolisher minimap2 model 1	GQ 20 INS-1, GQ 12 DEL-1, GQ 5 all other	INDEL	11180	11126	54	21721	81	30	15	0.99517	0.993004	0.994086	135	181	55.625881	3.25388	532
				SNP	70896	70892	4	82832	42	4	2	0.999944	0.999409	0.999676	46
	HiFi Sequel DC v1.1 50x , PHARAOH v6 (minimap2) with 40x UL	DeepPolisher minimap2 model 1	GQ 20 INS-1, GQ 12 DEL-1, GQ 5 all other	INDEL	11180	11129	51	21718	83	28	14	0.995438	0.992836	0.994135	134	179	55.625881	3.21793	519
				SNP	70896	70892	4	82829	41	4	1	0.999944	0.999423	0.999683	45
	HiFi Sequel DC v1.1 40x , PHARAOH v6 (minimap2) with 40x UL	DeepPolisher minimap2 model 1	GQ 20 INS-1, GQ 12 DEL-1, GQ 5 all other	INDEL	11180	11131	49	21712	75	25	10	0.995617	0.993523	0.994569	124	167	55.625881	3.0022	520
				SNP	70896	70891	5	82828	38	3	0	0.999929	0.999465	0.999697	43
	HiFi Sequel DC v1.1 30x , PHARAOH v6 (minimap2) with 40x UL	DeepPolisher minimap2 model 1	GQ 20 INS-1, GQ 12 DEL-1, GQ 5 all other	INDEL	11180	11128	52	21707	83	31	11	0.995349	0.992834	0.99409	135	182	55.625881	3.27186	484
				SNP	70896	70889	7	82825	40	4	1	0.999901	0.999437	0.999669	47
	HiFi Sequel DC v1.1 20x , PHARAOH v6 (minimap2) with 40x UL	DeepPolisher minimap2 model 1	GQ 20 INS-1, GQ 12 DEL-1, GQ 5 all other	INDEL	11180	11101	79	21685	104	50	15	0.992934	0.991015	0.991974	183	239	55.625881	4.29656	368
				SNP	70896	70885	11	82826	45	8	2	0.999845	0.999367	0.999606	56
	HiFi Sequel DC v1.1 10x , PHARAOH v6 (minimap2) with 40x UL	DeepPolisher minimap2 model 1	GQ 20 INS-1, GQ 12 DEL-1, GQ 5 all other	INDEL	11180	11067	113	21689	141	72	24	0.989893	0.987816	0.988853	254	308	55.625881	5.53699	211
				SNP	70896	70884	12	82822	42	5	1	0.999831	0.999409	0.99962	54
Coverage titration experiments - Revio DCv1.1, entire PHARAOH pipeline
HG002 Hifiasm v0.19.5 chr20	HiFi Revio DC v1.1 60x , PHARAOH v6 (minimap2) with 40x UL	DeepPolisher minimap2 model 1	GQ 20 INS-1, GQ 12 DEL-1, GQ 5 all other	INDEL	11180	11126	54	21709	80	29	10	0.99517	0.993092	0.99413	134	178	55.625881	3.19995	413
				SNP	70896	70891	5	82836	39	3	2	0.999929	0.999451	0.99969	44
	HiFi Revio DC v1.1 50x , PHARAOH v6 (minimap2) with 40x UL	DeepPolisher minimap2 model 1	GQ 20 INS-1, GQ 12 DEL-1, GQ 5 all other	INDEL	11180	11127	53	21706	77	27	9	0.995259	0.993348	0.994303	130	179	55.625881	3.21793	419
				SNP	70896	70887	9	82827	40	6	0	0.999873	0.999437	0.999655	49
	HiFi Revio DC v1.1 40x , PHARAOH v6 (minimap2) with 40x UL	DeepPolisher minimap2 model 1	GQ 20 INS-1, GQ 12 DEL-1, GQ 5 all other	INDEL	11180	11124	56	21708	75	28	11	0.994991	0.993518	0.994254	131	183	55.625881	3.28984	418
				SNP	70896	70885	11	82822	41	7	0	0.999845	0.999423	0.999634	52
	HiFi Revio DC v1.1 30x , PHARAOH v6 (minimap2) with 40x UL	DeepPolisher minimap2 model 1	GQ 20 INS-1, GQ 12 DEL-1, GQ 5 all other	INDEL	11180	11115	65	21707	89	36	15	0.994186	0.992309	0.993247	154	209	55.625881	3.75724	355
				SNP	70896	70886	10	82831	45	10	0	0.999859	0.999367	0.999613	55
	HiFi Revio DC v1.1 20x , PHARAOH v6 (minimap2) with 40x UL	DeepPolisher minimap2 model 1	GQ 20 INS-1, GQ 12 DEL-1, GQ 5 all other	INDEL	11180	11091	89	21694	107	50	14	0.992039	0.990749	0.991394	196	252	55.625881	4.53027	279
				SNP	70896	70885	11	82823	45	9	1	0.999845	0.999367	0.999606	56
	HiFi Revio DC v1.1 10x , PHARAOH v6 (minimap2) with 40x UL	DeepPolisher minimap2 model 1	GQ 20 INS-1, GQ 12 DEL-1, GQ 5 all other	INDEL	11180	11058	122	21682	138	69	22	0.989088	0.988061	0.988574	260	318	55.625881	5.71676	191
				SNP	70896	70882	14	82816	44	8	0	0.999803	0.999381	0.999592	58
Coverage titration experiments - Sequel CCS, entire PHARAOH pipeline
HG002 Hifiasm v0.19.5 chr20	HiFi Sequel CCS 50x , PHARAOH v6 (minimap2) with 40x UL	DeepPolisher minimap2 model 1	GQ 20 INS-1, GQ 12 DEL-1, GQ 5 all other	INDEL	11180	11115	65	21706	84	34	16	0.994186	0.99274	0.993462	149	200	55.625881	3.59545	312
				SNP	70896	70889	7	82835	44	6	3	0.999901	0.999381	0.999641	51
	HiFi Sequel CCS 40x , PHARAOH v6 (minimap2) with 40x UL	DeepPolisher minimap2 model 1	GQ 20 INS-1, GQ 12 DEL-1, GQ 5 all other	INDEL	11180	11121	59	21717	86	30	18	0.994723	0.992573	0.993647	145	194	55.625881	3.48759	321
				SNP	70896	70890	6	82835	43	5	3	0.999915	0.999395	0.999655	49
	HiFi Sequel CCS 30x , PHARAOH v6 (minimap2) with 40x UL	DeepPolisher minimap2 model 1	GQ 20 INS-1, GQ 12 DEL-1, GQ 5 all other	INDEL	11180	11109	71	21703	99	38	16	0.993649	0.991449	0.992548	170	216	55.625881	3.88308	303
				SNP	70896	70891	5	82824	41	4	1	0.999929	0.999423	0.999676	46
	HiFi Sequel CCS 20x , PHARAOH v6 (minimap2) with 40x UL	DeepPolisher minimap2 model 1	GQ 20 INS-1, GQ 12 DEL-1, GQ 5 all other	INDEL	11180	11100	80	21711	111	46	17	0.992844	0.990415	0.991628	191	240	55.625881	4.31454	270
				SNP	70896	70888	8	82833	41	3	2	0.999887	0.999423	0.999655	49
	HiFi Sequel CCS 10x , PHARAOH v6 (minimap2) with 40x UL	DeepPolisher minimap2 model 1	GQ 20 INS-1, GQ 12 DEL-1, GQ 5 all other	INDEL	11180	11065	115	21693	145	65	30	0.989714	0.987471	0.988591	260	311	55.625881	5.59092	205
				SNP	70896	70887	9	82833	42	5	1	0.999873	0.999409	0.999641	51
HG005 Hifiasm v0.19.5	HiFi Sequel CCS 50x , PHARAOH v6 (minimap2) with 40x UL	DeepPolisher minimap2 model 1	GQ 20 INS-1, GQ 12 DEL-1, GQ 5 all other	INDEL	414717	411738	2979	965873	3745	1780	896	0.992817	0.99122	0.992018	6724	12856	2490	5.16305	18730
				SNP	3252095	3249945	2150	3791764	3982	803	146	0.999339	0.998778	0.999058	6132
	HiFi Sequel CCS 40x , PHARAOH v6 (minimap2) with 40x UL	DeepPolisher minimap2 model 1	GQ 20 INS-1, GQ 12 DEL-1, GQ 5 all other	INDEL	414717	411537	3180	965790	3990	1936	987	0.992332	0.990646	0.991488	7170	13381	2490	5.3739	17324
				SNP	3252095	3249910	2185	3791789	4026	829	152	0.999328	0.998764	0.999046	6211
	HiFi Sequel CCS 30x , PHARAOH v6 (minimap2) with 40x UL	DeepPolisher minimap2 model 1	GQ 20 INS-1, GQ 12 DEL-1, GQ 5 all other	INDEL	414717	411519	3198	965498	3906	1911	876	0.992289	0.990841	0.991565	7104	13252	2490	5.32209	12157
				SNP	3252095	3249938	2157	3791103	3991	797	149	0.999337	0.998775	0.999056	6148
	HiFi Sequel CCS 20x , PHARAOH v6 (minimap2) with 40x UL	DeepPolisher minimap2 model 1	GQ 20 INS-1, GQ 12 DEL-1, GQ 5 all other	INDEL	414717	410780	3937	965234	4771	2410	1117	0.990507	0.988812	0.989659	8708	15041	2490	6.04056	18728
				SNP	3252095	3249853	2242	3791213	4091	849	166	0.999311	0.998744	0.999027	6333
	HiFi Sequel CCS 10x , PHARAOH v6 (minimap2) with 40x UL	DeepPolisher minimap2 model 1	GQ 20 INS-1, GQ 12 DEL-1, GQ 5 all other	INDEL	414717	409814	4903	964540	5646	2919	1123	0.988177	0.986755	0.987466	10549	17220	2490	6.91566	16574
				SNP	3252095	3249687	2408	3791538	4263	945	176	0.99926	0.998691	0.998975	6671
Coverage titration experiments - Sequel DCv1.2, just DeepPolisher (no PHARAOH)
HG002 Hifiasm v0.19.5 chr20	HiFi DC v1.2 60x minimap2, de>.04	DeepPolisher minimap2 model 1	GQ 20 INS-1, GQ 12 DEL-1, GQ 5 all other	INDEL	11180	11109	71	21685	93	40	15	0.993649	0.991963	0.992805	164	206	55.625881	3.70331	296
				SNP	70896	70890	6	82819	36	4	0	0.999915	0.999493	0.999704	42
	HiFi DC v1.2 50x minimap2, de>.04	DeepPolisher minimap2 model 1	GQ 20 INS-1, GQ 12 DEL-1, GQ 5 all other	INDEL	11180	11112	68	21684	86	35	13	0.993918	0.992567	0.993242	154	197	55.625881	3.54152	299
				SNP	70896	70890	6	82820	37	4	1	0.999915	0.999479	0.999697	43
	HiFi DC v1.2 40x minimap2, de>.04	DeepPolisher minimap2 model 1	GQ 20 INS-1, GQ 12 DEL-1, GQ 5 all other	INDEL	11180	11107	73	21695	97	39	13	0.99347	0.99162	0.992544	170	216	55.625881	3.88308	226
				SNP	70896	70890	6	82830	40	4	0	0.999915	0.999437	0.999676	46
	HiFi DC v1.2 30x minimap2, de>.04	DeepPolisher minimap2 model 1	GQ 20 INS-1, GQ 12 DEL-1, GQ 5 all other	INDEL	11180	11100	80	21688	107	45	16	0.992844	0.990756	0.991799	187	233	55.625881	4.1887	206
				SNP	70896	70890	6	82826	40	4	0	0.999915	0.999437	0.999676	46
	HiFi DC v1.2 20x minimap2, de>.04	DeepPolisher minimap2 model 1	GQ 20 INS-1, GQ 12 DEL-1, GQ 5 all other	INDEL	11180	11084	96	21668	113	52	16	0.991413	0.990231	0.990822	209	256	55.625881	4.60217	155
				SNP	70896	70889	7	82825	40	5	0	0.999901	0.999437	0.999669	47
	HiFi DC v1.2 10x minimap2, de>.04	DeepPolisher minimap2 model 1	GQ 20 INS-1, GQ 12 DEL-1, GQ 5 all other	INDEL	11180	11056	124	21665	143	71	19	0.988909	0.987636	0.988272	267	315	55.625881	5.66283	128
				SNP	70896	70889	7	82828	41	4	1	0.999901	0.999423	0.999662	48

## Sheet: 4. genome stratifications
Polisher	Type	Subset	METRIC.Recall	METRIC.Precision	METRIC.F1_Score	FP.gt	FP.al	TRUTH.TOTAL	TRUTH.TP	TRUTH.FN	QUERY.TOTAL	QUERY.FP	FP+FN	total Errors
HG002_deepvariant	INDEL	alldifficultregions	0.994628	0.993541	0.994084	27	10	7818	7776	42	17882	53	95	137
HG002_deepvariant	SNP	alldifficultregions	0.999531	0.99658	0.998053	4	0	10664	10659	5	20175	37	42	137
HG002_deepvariant	INDEL	AllHomopolymers_ge7bp_imperfectge11bp_slop5	0.996961	0.995331	0.996145	10	4	4936	4921	15	11329	24	39	41
HG002_deepvariant	SNP	AllHomopolymers_ge7bp_imperfectge11bp_slop5	0.999509	0.999524	0.999516	1	0	2037	2036	1	3601	1	2	41
HG002_deepvariant	INDEL	alllowmapandsegdupregions	1	0.972332	0.985972	0	0	250	250	0	1763	7	7	43
HG002_deepvariant	SNP	alllowmapandsegdupregions	0.99944	0.990592	0.994996	2	0	3572	3570	2	8679	34	36	43
HG002_deepvariant	INDEL	AllTandemRepeats	0.988636	0.9902	0.989417	18	6	2464	2436	28	6020	26	54	57
HG002_deepvariant	SNP	AllTandemRepeats	0.998935	0.99948	0.999208	1	0	1878	1876	2	6622	1	3	57
HG002_deepvariant	INDEL	AllTandemRepeats_201to10000bp_slop5	0.995968	0.996016	0.995992	0	0	248	247	1	1797	1	2	2
HG002_deepvariant	SNP	AllTandemRepeats_201to10000bp_slop5	1	1	1	0	0	530	530	0	2953	0	0	2
HG002_deepvariant	INDEL	AllTandemRepeats_51to200bp_slop5	0.980226	0.98545	0.982831	7	4	708	694	14	1831	11	25	25
HG002_deepvariant	SNP	AllTandemRepeats_51to200bp_slop5	1	1	1	0	0	620	620	0	1438	0	0	25
HG002_deepvariant	INDEL	AllTandemRepeats_ge10001bp_slop5	0			0	0	0	0	0	218	0	0	0
HG002_deepvariant	SNP	AllTandemRepeats_ge10001bp_slop5	0			0	0	0	0	0	1217	0	0	0
HG002_deepvariant	INDEL	AllTandemRepeats_ge101bp_slop5	0.991579	0.993852	0.992714	2	0	475	471	4	2767	3	7	7
HG002_deepvariant	SNP	AllTandemRepeats_ge101bp_slop5	1	1	1	0	0	770	770	0	4863	0	0	7
HG002_deepvariant	INDEL	AllTandemRepeats_le50bp_slop5	0.991379	0.991495	0.991437	11	2	1508	1495	13	2186	14	27	30
HG002_deepvariant	SNP	AllTandemRepeats_le50bp_slop5	0.997253	0.998663	0.997957	1	0	728	726	2	1014	1	3	30
HG002_deepvariant	INDEL	AllTandemRepeatsandHomopolymers_slop5	0.994313	0.993828	0.99407	27	9	7385	7343	42	17238	48	90	95
HG002_deepvariant	SNP	AllTandemRepeatsandHomopolymers_slop5	0.999234	0.999503	0.999368	2	0	3915	3912	3	10223	2	5	95
HG002_deepvariant	INDEL	lowmappabilityall	1	0.973333	0.986486	0	0	149	149	0	1090	4	4	21
HG002_deepvariant	SNP	lowmappabilityall	0.999231	0.994273	0.996746	2	0	2602	2600	2	5646	15	17	21
HG002_deepvariant	INDEL	nonunique_l100_m2_e1	1	0.973333	0.986486	0	0	149	149	0	1088	4	4	21
HG002_deepvariant	SNP	nonunique_l100_m2_e1	0.999231	0.994273	0.996746	2	0	2602	2600	2	5635	15	17	21
HG002_deepvariant	INDEL	nonunique_l250_m0_e0	1	1	1	0	0	2	2	0	116	0	0	0
HG002_deepvariant	SNP	nonunique_l250_m0_e0	1	1	1	0	0	159	159	0	476	0	0	0
HG002_deepvariant	INDEL	notinalldifficultregions	0.997918	0.999106	0.998512	2	0	3362	3355	7	3870	3	10	13
HG002_deepvariant	SNP	notinalldifficultregions	0.99995	1	0.999975	0	0	60232	60229	3	62312	0	3	13
HG002_deepvariant	INDEL	notinAllHomopolymers_ge7bp_imperfectge11bp_slop5	0.994413	0.994413	0.994413	20	7	6264	6229	35	10515	36	71	114
HG002_deepvariant	SNP	notinAllHomopolymers_ge7bp_imperfectge11bp_slop5	0.999898	0.999478	0.999688	3	0	68859	68852	7	78886	36	43	114
HG002_deepvariant	INDEL	notinalllowmapandsegdupregions	0.995515	0.995665	0.99559	29	10	10925	10876	49	19993	49	98	107
HG002_deepvariant	SNP	notinalllowmapandsegdupregions	0.999911	0.999956	0.999933	2	0	67324	67318	6	73808	3	9	107
HG002_deepvariant	INDEL	notinallTandemRepeats	0.99748	0.996414	0.996947	12	5	8731	8709	22	15794	32	54	96
HG002_deepvariant	SNP	notinallTandemRepeats	0.999913	0.999479	0.999696	3	0	69018	69012	6	75865	36	42	96
HG002_deepvariant	INDEL	notinAllTandemRepeatsandHomopolymers_slop5	0.998158	0.997362	0.99776	2	1	3800	3793	7	4526	10	17	57
HG002_deepvariant	SNP	notinAllTandemRepeatsandHomopolymers_slop5	0.999925	0.999478	0.999702	2	0	66981	66976	5	72264	35	40	57
HG002_deepvariant	INDEL	notinlowmappabilityall	0.995556	0.995266	0.995411	29	10	11025	10976	49	20670	54	103	131
HG002_deepvariant	SNP	notinlowmappabilityall	0.999912	0.999679	0.999795	2	0	68294	68288	6	76841	22	28	131
HG002_deepvariant	INDEL	notinrefseq_cds	0.995612	0.995151	0.995382	29	10	11168	11119	49	21677	56	105	150
HG002_deepvariant	SNP	notinrefseq_cds	0.999886	0.999475	0.999681	4	0	70365	70357	8	81924	37	45	150
HG002_deepvariant	INDEL	notinsatellites_slop5	0.995617	0.995156	0.995387	29	10	11180	11131	49	21585	56	105	150
HG002_deepvariant	SNP	notinsatellites_slop5	0.999887	0.999479	0.999683	4	0	70879	70871	8	81263	37	45	150
HG002_deepvariant	INDEL	notinsegdups	0.995571	0.995629	0.9956	29	10	11064	11015	49	20730	50	99	108
HG002_deepvariant	SNP	notinsegdups	0.999914	0.999957	0.999935	2	0	69611	69605	6	77304	3	9	108
HG002_deepvariant	INDEL	notinsegdups_gt10kb	0.995582	0.995639	0.99561	29	10	11090	11041	49	20868	50	99	108
HG002_deepvariant	SNP	notinsegdups_gt10kb	0.999914	0.999957	0.999936	2	0	69837	69831	6	77706	3	9	108
HG002_deepvariant	INDEL	refseq_cds	1	1	1	0	0	11	11	0	16	0	0	0
HG002_deepvariant	SNP	refseq_cds	1	1	1	0	0	531	531	0	563	0	0	0
HG002_deepvariant	INDEL	satellites_slop5	0			0	0	0	0	0	113	0	0	0
HG002_deepvariant	SNP	satellites_slop5	1	1	1	0	0	17	17	0	1224	0	0	0
HG002_deepvariant	INDEL	segdups	1	0.950413	0.974576	0	0	116	116	0	966	6	6	42
HG002_deepvariant	SNP	segdups	0.998444	0.974301	0.986224	2	0	1285	1283	2	5183	34	36	42
HG002_deepvariant	INDEL	segdups_gt10kb	1	0.9375	0.967742	0	0	90	90	0	827	6	6	42
HG002_deepvariant	SNP	segdups_gt10kb	0.998111	0.968921	0.9833	2	0	1059	1057	2	4781	34	36	42
HG002_deepvariant	INDEL	SimpleRepeat_diTR_10to49_slop5	0.98689	0.988621	0.987755	12	4	1373	1355	18	2802	17	35	37
HG002_deepvariant	SNP	SimpleRepeat_diTR_10to49_slop5	0.997596	0.997792	0.997694	1	0	416	415	1	1298	1	2	37
HG002_deepvariant	INDEL	SimpleRepeat_diTR_50to149_slop5	0.888889	0.868421	0.878536	2	2	27	24	3	160	5	8	8
HG002_deepvariant	SNP	SimpleRepeat_diTR_50to149_slop5	1	1	1	0	0	1	1	0	52	0	0	8
HG002_deepvariant	INDEL	SimpleRepeat_diTR_ge150_slop5	0	0		0	0	0	0	0	0	0	0	0
HG002_deepvariant	SNP	SimpleRepeat_diTR_ge150_slop5	0	0		0	0	0	0	0	0	0	0	0
HG002_deepvariant	INDEL	SimpleRepeat_homopolymer_4to6_slop5	0.99662	0.995707	0.996163	7	1	2959	2949	10	5045	13	23	34
HG002_deepvariant	SNP	SimpleRepeat_homopolymer_4to6_slop5	1	0.999349	0.999674	0	0	16852	16852	0	19566	11	11	34
HG002_deepvariant	INDEL	SimpleRepeat_homopolymer_7to11_slop5	0.997657	0.997191	0.997424	3	2	2134	2129	5	2997	6	11	13
HG002_deepvariant	SNP	SimpleRepeat_homopolymer_7to11_slop5	0.999319	0.999336	0.999328	1	0	1469	1468	1	2021	1	2	13
HG002_deepvariant	INDEL	SimpleRepeat_homopolymer_ge12_slop5	0.996303	0.994479	0.99539	6	2	2705	2695	10	8190	16	26	26
HG002_deepvariant	SNP	SimpleRepeat_homopolymer_ge12_slop5	1	1	1	0	0	317	317	0	1218	0	0	26
HG002_deepvariant	INDEL	SimpleRepeat_homopolymer_ge21_slop5	1	1	1	0	0	169	169	0	2906	0	0	0
HG002_deepvariant	SNP	SimpleRepeat_homopolymer_ge21_slop5	1	1	1	0	0	17	17	0	316	0	0	0
HG002_deepvariant	INDEL	TS_boundary	0.990683	0.986264	0.988469	2	1	322	319	3	1190	5	8	8
HG002_deepvariant	SNP	TS_boundary	1	1	1	0	0	1	1	0	235	0	0	8
HG002_deepvariant	INDEL	TS_contained	0.995763	0.995445	0.995604	27	9	10858	10812	46	11197	51	97	142
HG002_deepvariant	SNP	TS_contained	0.999887	0.999479	0.999683	4	0	70895	70887	8	71041	37	45	142
HG002_nextPolish2	INDEL	alldifficultregions	0.948452	0.966617	0.957448	224	33	7818	7415	403	17488	268	671	714
HG002_nextPolish2	SNP	alldifficultregions	0.999531	0.996486	0.998006	6	0	10664	10659	5	20169	38	43	714
HG002_nextPolish2	INDEL	AllHomopolymers_ge7bp_imperfectge11bp_slop5	0.931929	0.958425	0.944991	181	21	4936	4600	336	10965	207	543	547
HG002_nextPolish2	SNP	AllHomopolymers_ge7bp_imperfectge11bp_slop5	0.999509	0.998567	0.999038	3	0	2037	2036	1	3591	3	4	547
HG002_nextPolish2	INDEL	alllowmapandsegdupregions	1	0.972332	0.985972	0	0	250	250	0	1739	7	7	43
HG002_nextPolish2	SNP	alllowmapandsegdupregions	0.99944	0.990592	0.994996	2	0	3572	3570	2	8680	34	36	43
HG002_nextPolish2	INDEL	AllTandemRepeats	0.973214	0.978014	0.975608	43	12	2464	2398	66	5989	58	124	127
HG002_nextPolish2	SNP	AllTandemRepeats	0.998935	0.99948	0.999208	1	0	1878	1876	2	6627	1	3	127
HG002_nextPolish2	INDEL	AllTandemRepeats_201to10000bp_slop5	0.987903	0.991968	0.989931	1	0	248	245	3	1791	2	5	5
HG002_nextPolish2	SNP	AllTandemRepeats_201to10000bp_slop5	1	1	1	0	0	530	530	0	2958	0	0	5
HG002_nextPolish2	INDEL	AllTandemRepeats_51to200bp_slop5	0.966102	0.97344	0.969757	14	5	708	684	24	1818	20	44	44
HG002_nextPolish2	SNP	AllTandemRepeats_51to200bp_slop5	1	1	1	0	0	620	620	0	1439	0	0	44
HG002_nextPolish2	INDEL	AllTandemRepeats_ge10001bp_slop5	0			0	0	0	0	0	218	0	0	0
HG002_nextPolish2	SNP	AllTandemRepeats_ge10001bp_slop5	0			0	0	0	0	0	1217	0	0	0
HG002_nextPolish2	INDEL	AllTandemRepeats_ge101bp_slop5	0.981053	0.985597	0.983319	5	1	475	466	9	2758	7	16	16
HG002_nextPolish2	SNP	AllTandemRepeats_ge101bp_slop5	1	1	1	0	0	770	770	0	4865	0	0	16
HG002_nextPolish2	INDEL	AllTandemRepeats_le50bp_slop5	0.974138	0.977995	0.976063	28	7	1508	1469	39	2174	36	75	78
HG002_nextPolish2	SNP	AllTandemRepeats_le50bp_slop5	0.997253	0.998663	0.997957	1	0	728	726	2	1013	1	3	78
HG002_nextPolish2	INDEL	AllTandemRepeatsandHomopolymers_slop5	0.945701	0.965145	0.955324	224	33	7385	6984	401	16848	265	666	673
HG002_nextPolish2	SNP	AllTandemRepeatsandHomopolymers_slop5	0.999234	0.999004	0.999119	4	0	3915	3912	3	10218	4	7	673
HG002_nextPolish2	INDEL	lowmappabilityall	1	0.973333	0.986486	0	0	149	149	0	1085	4	4	21
HG002_nextPolish2	SNP	lowmappabilityall	0.999231	0.994273	0.996746	2	0	2602	2600	2	5645	15	17	21
HG002_nextPolish2	INDEL	nonunique_l100_m2_e1	1	0.973333	0.986486	0	0	149	149	0	1083	4	4	21
HG002_nextPolish2	SNP	nonunique_l100_m2_e1	0.999231	0.994273	0.996746	2	0	2602	2600	2	5634	15	17	21
HG002_nextPolish2	INDEL	nonunique_l250_m0_e0	1	1	1	0	0	2	2	0	116	0	0	0
HG002_nextPolish2	SNP	nonunique_l250_m0_e0	1	1	1	0	0	159	159	0	476	0	0	0
HG002_nextPolish2	INDEL	notinalldifficultregions	0.995241	0.996126	0.995683	8	3	3362	3346	16	3870	13	29	38
HG002_nextPolish2	SNP	notinalldifficultregions	0.9999	0.99995	0.999925	3	0	60232	60226	6	62312	3	9	38
HG002_nextPolish2	INDEL	notinAllHomopolymers_ge7bp_imperfectge11bp_slop5	0.98659	0.988173	0.987381	51	15	6264	6180	84	10480	76	160	208
HG002_nextPolish2	SNP	notinAllHomopolymers_ge7bp_imperfectge11bp_slop5	0.999855	0.999449	0.999652	6	0	68859	68849	10	78890	38	48	208
HG002_nextPolish2	INDEL	notinalllowmapandsegdupregions	0.961648	0.975373	0.968462	232	36	10925	10506	419	19623	274	693	709
HG002_nextPolish2	SNP	notinalllowmapandsegdupregions	0.999866	0.999896	0.999881	7	0	67324	67315	9	73801	7	16	709
HG002_nextPolish2	INDEL	notinallTandemRepeats	0.959455	0.974543	0.96694	189	24	8731	8377	354	15426	223	577	626
HG002_nextPolish2	SNP	notinallTandemRepeats	0.99987	0.999421	0.999645	8	0	69018	69009	9	75854	40	49	626
HG002_nextPolish2	INDEL	notinAllTandemRepeatsandHomopolymers_slop5	0.995263	0.995248	0.995256	8	3	3800	3782	18	4522	18	36	81
HG002_nextPolish2	SNP	notinAllTandemRepeatsandHomopolymers_slop5	0.999881	0.999448	0.999664	5	0	66981	66973	8	72263	37	45	81
HG002_nextPolish2	INDEL	notinlowmappabilityall	0.961995	0.975156	0.968531	232	36	11025	10606	419	20282	279	698	733
HG002_nextPolish2	SNP	notinlowmappabilityall	0.999868	0.99962	0.999744	7	0	68294	68285	9	76836	26	35	733
HG002_nextPolish2	INDEL	notinrefseq_cds	0.962482	0.97529	0.968844	232	36	11168	10749	419	21283	281	700	752
HG002_nextPolish2	SNP	notinrefseq_cds	0.999844	0.999419	0.999631	9	0	70365	70354	11	81918	41	52	752
HG002_nextPolish2	INDEL	notinsatellites_slop5	0.962522	0.975316	0.968877	232	36	11180	10761	419	21193	281	700	752
HG002_nextPolish2	SNP	notinsatellites_slop5	0.999845	0.999423	0.999634	9	0	70879	70868	11	81257	41	52	752
HG002_nextPolish2	INDEL	notinsegdups	0.962129	0.975584	0.96881	232	36	11064	10645	419	20356	275	694	710
HG002_nextPolish2	SNP	notinsegdups	0.999871	0.9999	0.999885	7	0	69611	69602	9	77297	7	16	710
HG002_nextPolish2	INDEL	notinsegdups_gt10kb	0.962218	0.975638	0.968882	232	36	11090	10671	419	20490	275	694	710
HG002_nextPolish2	SNP	notinsegdups_gt10kb	0.999871	0.9999	0.999886	7	0	69837	69828	9	77698	7	16	710
HG002_nextPolish2	INDEL	refseq_cds	1	1	1	0	0	11	11	0	16	0	0	0
HG002_nextPolish2	SNP	refseq_cds	1	1	1	0	0	531	531	0	563	0	0	0
HG002_nextPolish2	INDEL	satellites_slop5	0			0	0	0	0	0	111	0	0	0
HG002_nextPolish2	SNP	satellites_slop5	1	1	1	0	0	17	17	0	1224	0	0	0
HG002_nextPolish2	INDEL	segdups	1	0.950413	0.974576	0	0	116	116	0	946	6	6	42
HG002_nextPolish2	SNP	segdups	0.998444	0.974301	0.986224	2	0	1285	1283	2	5184	34	36	42
HG002_nextPolish2	INDEL	segdups_gt10kb	1	0.9375	0.967742	0	0	90	90	0	811	6	6	42
HG002_nextPolish2	SNP	segdups_gt10kb	0.998111	0.968921	0.9833	2	0	1059	1057	2	4783	34	36	42
HG002_nextPolish2	INDEL	SimpleRepeat_diTR_10to49_slop5	0.966497	0.97037	0.96843	32	11	1373	1327	46	2783	44	90	92
HG002_nextPolish2	SNP	SimpleRepeat_diTR_10to49_slop5	0.997596	0.997788	0.997692	1	0	416	415	1	1296	1	2	92
HG002_nextPolish2	INDEL	SimpleRepeat_diTR_50to149_slop5	0.851852	0.842105	0.846951	2	3	27	23	4	160	6	10	10
HG002_nextPolish2	SNP	SimpleRepeat_diTR_50to149_slop5	1	1	1	0	0	1	1	0	52	0	0	10
HG002_nextPolish2	INDEL	SimpleRepeat_diTR_ge150_slop5	0	0		0	0	0	0	0	0	0	0	0
HG002_nextPolish2	SNP	SimpleRepeat_diTR_ge150_slop5	0	0		0	0	0	0	0	0	0	0	0
HG002_nextPolish2	INDEL	SimpleRepeat_homopolymer_4to6_slop5	0.973302	0.983628	0.978438	39	6	2959	2880	79	4995	49	128	144
HG002_nextPolish2	SNP	SimpleRepeat_homopolymer_4to6_slop5	0.999881	0.999171	0.999526	4	0	16852	16850	2	19566	14	16	144
HG002_nextPolish2	INDEL	SimpleRepeat_homopolymer_7to11_slop5	0.961106	0.98088	0.970892	34	4	2134	2051	83	2930	40	123	125
HG002_nextPolish2	SNP	SimpleRepeat_homopolymer_7to11_slop5	0.999319	0.999335	0.999327	1	0	1469	1468	1	2014	1	2	125
HG002_nextPolish2	INDEL	SimpleRepeat_homopolymer_ge12_slop5	0.904991	0.938196	0.921294	151	17	2705	2448	257	7888	172	429	431
HG002_nextPolish2	SNP	SimpleRepeat_homopolymer_ge12_slop5	1	0.994135	0.997059	2	0	317	317	0	1211	2	2	431
HG002_nextPolish2	INDEL	SimpleRepeat_homopolymer_ge21_slop5	0.934911	0.933333	0.934122	6	8	169	158	11	2869	14	25	25
HG002_nextPolish2	SNP	SimpleRepeat_homopolymer_ge21_slop5	1	1	1	0	0	17	17	0	315	0	0	25
HG002_nextPolish2	INDEL	TS_boundary	0.978261	0.980556	0.979407	4	1	322	315	7	1182	7	14	14
HG002_nextPolish2	SNP	TS_boundary	1	1	1	0	0	1	1	0	232	0	0	14
HG002_nextPolish2	INDEL	TS_contained	0.962056	0.975145	0.968556	228	35	10858	10446	412	11024	274	686	738
HG002_nextPolish2	SNP	TS_contained	0.999845	0.999423	0.999634	9	0	70895	70884	11	71035	41	52	738
HG002_t2t_polish	INDEL	alldifficultregions	0.982348	0.982405	0.982377	81	27	7818	7680	138	17810	144	282	327
HG002_t2t_polish	SNP	alldifficultregions	0.999437	0.996395	0.997914	5	1	10664	10658	6	20179	39	45	327
HG002_t2t_polish	INDEL	AllHomopolymers_ge7bp_imperfectge11bp_slop5	0.988857	0.988694	0.988776	29	10	4936	4881	55	11296	58	113	116
HG002_t2t_polish	SNP	AllHomopolymers_ge7bp_imperfectge11bp_slop5	0.999509	0.999047	0.999278	2	0	2037	2036	1	3601	2	3	116
HG002_t2t_polish	INDEL	alllowmapandsegdupregions	1	0.972332	0.985972	0	0	250	250	0	1761	7	7	43
HG002_t2t_polish	SNP	alllowmapandsegdupregions	0.99944	0.990592	0.994996	2	0	3572	3570	2	8681	34	36	43
HG002_t2t_polish	INDEL	AllTandemRepeats	0.965909	0.972994	0.969438	52	15	2464	2380	84	5968	71	155	160
HG002_t2t_polish	SNP	AllTandemRepeats	0.998403	0.99896	0.998681	1	1	1878	1875	3	6626	2	5	160
HG002_t2t_polish	INDEL	AllTandemRepeats_201to10000bp_slop5	0.971774	0.979757	0.975749	4	0	248	241	7	1784	5	12	12
HG002_t2t_polish	SNP	AllTandemRepeats_201to10000bp_slop5	1	1	1	0	0	530	530	0	2958	0	0	12
HG002_t2t_polish	INDEL	AllTandemRepeats_51to200bp_slop5	0.957627	0.965379	0.961488	17	8	708	678	30	1813	26	56	57
HG002_t2t_polish	SNP	AllTandemRepeats_51to200bp_slop5	1	0.99845	0.999224	0	1	620	620	0	1439	1	1	57
HG002_t2t_polish	INDEL	AllTandemRepeats_ge10001bp_slop5	0			0	0	0	0	0	218	0	0	0
HG002_t2t_polish	SNP	AllTandemRepeats_ge10001bp_slop5	0			0	0	0	0	0	1217	0	0	0
HG002_t2t_polish	INDEL	AllTandemRepeats_ge101bp_slop5	0.968421	0.97314	0.970775	9	3	475	460	15	2748	13	28	29
HG002_t2t_polish	SNP	AllTandemRepeats_ge101bp_slop5	1	0.998718	0.999359	0	1	770	770	0	4866	1	1	29
HG002_t2t_polish	INDEL	AllTandemRepeats_le50bp_slop5	0.968833	0.975475	0.972143	31	7	1508	1461	47	2165	40	87	91
HG002_t2t_polish	SNP	AllTandemRepeats_le50bp_slop5	0.995879	0.998661	0.997268	1	0	728	725	3	1012	1	4	91
HG002_t2t_polish	INDEL	AllTandemRepeatsandHomopolymers_slop5	0.981313	0.983344	0.982328	81	25	7385	7247	138	17156	129	267	275
HG002_t2t_polish	SNP	AllTandemRepeatsandHomopolymers_slop5	0.998978	0.999006	0.998992	3	1	3915	3911	4	10227	4	8	275
HG002_t2t_polish	INDEL	lowmappabilityall	1	0.973333	0.986486	0	0	149	149	0	1090	4	4	21
HG002_t2t_polish	SNP	lowmappabilityall	0.999231	0.994273	0.996746	2	0	2602	2600	2	5646	15	17	21
HG002_t2t_polish	INDEL	nonunique_l100_m2_e1	1	0.973333	0.986486	0	0	149	149	0	1088	4	4	21
HG002_t2t_polish	SNP	nonunique_l100_m2_e1	0.999231	0.994273	0.996746	2	0	2602	2600	2	5635	15	17	21
HG002_t2t_polish	INDEL	nonunique_l250_m0_e0	1	1	1	0	0	2	2	0	115	0	0	0
HG002_t2t_polish	SNP	nonunique_l250_m0_e0	1	1	1	0	0	159	159	0	476	0	0	0
HG002_t2t_polish	INDEL	notinalldifficultregions	0.994943	0.995235	0.995089	7	1	3362	3345	17	3872	16	33	45
HG002_t2t_polish	SNP	notinalldifficultregions	0.999851	0.99995	0.9999	3	0	60232	60223	9	62309	3	12	45
HG002_t2t_polish	INDEL	notinAllHomopolymers_ge7bp_imperfectge11bp_slop5	0.983876	0.983833	0.983855	59	18	6264	6163	101	10475	104	205	259
HG002_t2t_polish	SNP	notinAllHomopolymers_ge7bp_imperfectge11bp_slop5	0.999797	0.99942	0.999608	6	1	68859	68845	14	78887	40	54	259
HG002_t2t_polish	INDEL	notinalllowmapandsegdupregions	0.985812	0.986441	0.986127	88	28	10925	10770	155	19926	153	308	329
HG002_t2t_polish	SNP	notinalllowmapandsegdupregions	0.999807	0.999881	0.999844	6	1	67324	67311	13	73807	8	21	329
HG002_t2t_polish	INDEL	notinallTandemRepeats	0.991754	0.99003	0.990891	36	13	8731	8659	72	15773	89	161	213
HG002_t2t_polish	SNP	notinallTandemRepeats	0.999826	0.999421	0.999624	7	0	69018	69006	12	75862	40	52	213
HG002_t2t_polish	INDEL	notinAllTandemRepeatsandHomopolymers_slop5	0.995526	0.991325	0.993421	7	3	3800	3783	17	4538	33	50	99
HG002_t2t_polish	SNP	notinAllTandemRepeatsandHomopolymers_slop5	0.999836	0.999433	0.999634	5	0	66981	66970	11	72261	38	49	99
HG002_t2t_polish	INDEL	notinlowmappabilityall	0.985941	0.986126	0.986033	88	28	11025	10870	155	20601	158	313	353
HG002_t2t_polish	SNP	notinlowmappabilityall	0.99981	0.999605	0.999708	6	1	68294	68281	13	76842	27	40	353
HG002_t2t_polish	INDEL	notinrefseq_cds	0.986211	0.986381	0.986296	88	28	11168	11014	154	21605	157	311	368
HG002_t2t_polish	SNP	notinrefseq_cds	0.999787	0.999404	0.999596	8	1	70365	70350	15	81925	42	57	368
HG002_t2t_polish	INDEL	notinsatellites_slop5	0.986136	0.986138	0.986137	88	28	11180	11025	155	21515	160	315	372
HG002_t2t_polish	SNP	notinsatellites_slop5	0.999788	0.999409	0.999599	8	1	70879	70864	15	81264	42	57	372
HG002_t2t_polish	INDEL	notinsegdups	0.985991	0.986516	0.986253	88	28	11064	10909	155	20663	154	309	330
HG002_t2t_polish	SNP	notinsegdups	0.999813	0.999885	0.999849	6	1	69611	69598	13	77303	8	21	330
HG002_t2t_polish	INDEL	notinsegdups_gt10kb	0.986023	0.986546	0.986284	88	28	11090	10935	155	20800	154	309	330
HG002_t2t_polish	SNP	notinsegdups_gt10kb	0.999814	0.999886	0.99985	6	1	69837	69824	13	77705	8	21	330
HG002_t2t_polish	INDEL	refseq_cds	0.909091	0.769231	0.833333	0	0	11	10	1	18	3	4	4
HG002_t2t_polish	SNP	refseq_cds	1	1	1	0	0	531	531	0	563	0	0	4
HG002_t2t_polish	INDEL	satellites_slop5	0			0	0	0	0	0	113	0	0	0
HG002_t2t_polish	SNP	satellites_slop5	1	1	1	0	0	17	17	0	1224	0	0	0
HG002_t2t_polish	INDEL	segdups	1	0.950413	0.974576	0	0	116	116	0	963	6	6	42
HG002_t2t_polish	SNP	segdups	0.998444	0.974301	0.986224	2	0	1285	1283	2	5185	34	36	42
HG002_t2t_polish	INDEL	segdups_gt10kb	1	0.9375	0.967742	0	0	90	90	0	825	6	6	42
HG002_t2t_polish	SNP	segdups_gt10kb	0.998111	0.968921	0.9833	2	0	1059	1057	2	4783	34	36	42
HG002_t2t_polish	INDEL	SimpleRepeat_diTR_10to49_slop5	0.959213	0.965587	0.96239	36	13	1373	1317	56	2778	51	107	112
HG002_t2t_polish	SNP	SimpleRepeat_diTR_10to49_slop5	0.995192	0.993377	0.994284	2	1	416	414	2	1297	3	5	112
HG002_t2t_polish	INDEL	SimpleRepeat_diTR_50to149_slop5	0.777778	0.763158	0.770398	3	4	27	21	6	160	9	15	15
HG002_t2t_polish	SNP	SimpleRepeat_diTR_50to149_slop5	1	1	1	0	0	1	1	0	52	0	0	15
HG002_t2t_polish	INDEL	SimpleRepeat_diTR_ge150_slop5	0	0		0	0	0	0	0	0	0	0	0
HG002_t2t_polish	SNP	SimpleRepeat_diTR_ge150_slop5	0	0		0	0	0	0	0	0	0	0	0
HG002_t2t_polish	INDEL	SimpleRepeat_homopolymer_4to6_slop5	0.987158	0.987756	0.987457	23	1	2959	2921	38	5032	37	75	91
HG002_t2t_polish	SNP	SimpleRepeat_homopolymer_4to6_slop5	0.999822	0.99923	0.999526	1	1	16852	16849	3	19564	13	16	91
HG002_t2t_polish	INDEL	SimpleRepeat_homopolymer_7to11_slop5	0.992502	0.992971	0.992737	9	2	2134	2118	16	2993	15	31	34
HG002_t2t_polish	SNP	SimpleRepeat_homopolymer_7to11_slop5	0.999319	0.998673	0.998996	2	0	1469	1468	1	2020	2	3	34
HG002_t2t_polish	INDEL	SimpleRepeat_homopolymer_ge12_slop5	0.985582	0.985472	0.985527	20	8	2705	2666	39	8160	42	81	81
HG002_t2t_polish	SNP	SimpleRepeat_homopolymer_ge12_slop5	1	1	1	0	0	317	317	0	1218	0	0	81
HG002_t2t_polish	INDEL	SimpleRepeat_homopolymer_ge21_slop5	0.988166	0.981221	0.984681	1	3	169	167	2	2896	4	6	6
HG002_t2t_polish	SNP	SimpleRepeat_homopolymer_ge21_slop5	1	1	1	0	0	17	17	0	316	0	0	6
HG002_t2t_polish	INDEL	TS_boundary	0.978261	0.977839	0.97805	4	2	322	315	7	1184	8	15	15
HG002_t2t_polish	SNP	TS_boundary	1	1	1	0	0	1	1	0	233	0	0	15
HG002_t2t_polish	INDEL	TS_contained	0.986369	0.986406	0.986388	84	26	10858	10710	148	11181	152	300	357
HG002_t2t_polish	SNP	TS_contained	0.999788	0.999409	0.999599	8	1	70895	70880	15	71038	42	57	357
HG002_y2_DCv1.2_PHv6_mm2_model1_dockerv0.8_HPRC_GQ	INDEL	alldifficultregions	0.99386	0.99136	0.992609	25	15	7818	7770	48	17885	71	119	159
HG002_y2_DCv1.2_PHv6_mm2_model1_dockerv0.8_HPRC_GQ	SNP	alldifficultregions	0.999812	0.996489	0.998148	2	1	10664	10662	2	20194	38	40	159
HG002_y2_DCv1.2_PHv6_mm2_model1_dockerv0.8_HPRC_GQ	INDEL	AllHomopolymers_ge7bp_imperfectge11bp_slop5	0.992301	0.99143	0.991865	21	8	4936	4898	38	11307	44	82	83
HG002_y2_DCv1.2_PHv6_mm2_model1_dockerv0.8_HPRC_GQ	SNP	AllHomopolymers_ge7bp_imperfectge11bp_slop5	1	0.999524	0.999762	0	1	2037	2037	0	3602	1	1	83
HG002_y2_DCv1.2_PHv6_mm2_model1_dockerv0.8_HPRC_GQ	INDEL	alllowmapandsegdupregions	1	0.972332	0.985972	0	0	250	250	0	1769	7	7	43
HG002_y2_DCv1.2_PHv6_mm2_model1_dockerv0.8_HPRC_GQ	SNP	alllowmapandsegdupregions	0.99944	0.990592	0.994996	2	0	3572	3570	2	8681	34	36	43
HG002_y2_DCv1.2_PHv6_mm2_model1_dockerv0.8_HPRC_GQ	INDEL	AllTandemRepeats	0.995536	0.995113	0.995324	4	5	2464	2453	11	6033	13	24	24
HG002_y2_DCv1.2_PHv6_mm2_model1_dockerv0.8_HPRC_GQ	SNP	AllTandemRepeats	1	1	1	0	0	1878	1878	0	6638	0	0	24
HG002_y2_DCv1.2_PHv6_mm2_model1_dockerv0.8_HPRC_GQ	INDEL	AllTandemRepeats_201to10000bp_slop5	0.995968	0.996016	0.995992	0	0	248	247	1	1801	1	2	2
HG002_y2_DCv1.2_PHv6_mm2_model1_dockerv0.8_HPRC_GQ	SNP	AllTandemRepeats_201to10000bp_slop5	1	1	1	0	0	530	530	0	2961	0	0	2
HG002_y2_DCv1.2_PHv6_mm2_model1_dockerv0.8_HPRC_GQ	INDEL	AllTandemRepeats_51to200bp_slop5	0.992938	0.993421	0.993179	2	2	708	703	5	1836	5	10	10
HG002_y2_DCv1.2_PHv6_mm2_model1_dockerv0.8_HPRC_GQ	SNP	AllTandemRepeats_51to200bp_slop5	1	1	1	0	0	620	620	0	1445	0	0	10
HG002_y2_DCv1.2_PHv6_mm2_model1_dockerv0.8_HPRC_GQ	INDEL	AllTandemRepeats_ge10001bp_slop5	0			0	0	0	0	0	218	0	0	0
HG002_y2_DCv1.2_PHv6_mm2_model1_dockerv0.8_HPRC_GQ	SNP	AllTandemRepeats_ge10001bp_slop5	0			0	0	0	0	0	1217	0	0	0
HG002_y2_DCv1.2_PHv6_mm2_model1_dockerv0.8_HPRC_GQ	INDEL	AllTandemRepeats_ge101bp_slop5	0.997895	0.997955	0.997925	0	0	475	474	1	2772	1	2	2
HG002_y2_DCv1.2_PHv6_mm2_model1_dockerv0.8_HPRC_GQ	SNP	AllTandemRepeats_ge101bp_slop5	1	1	1	0	0	770	770	0	4871	0	0	2
HG002_y2_DCv1.2_PHv6_mm2_model1_dockerv0.8_HPRC_GQ	INDEL	AllTandemRepeats_le50bp_slop5	0.996684	0.995755	0.996219	2	3	1508	1503	5	2190	7	12	12
HG002_y2_DCv1.2_PHv6_mm2_model1_dockerv0.8_HPRC_GQ	SNP	AllTandemRepeats_le50bp_slop5	1	1	1	0	0	728	728	0	1015	0	0	12
HG002_y2_DCv1.2_PHv6_mm2_model1_dockerv0.8_HPRC_GQ	INDEL	AllTandemRepeatsandHomopolymers_slop5	0.9935	0.992674	0.993087	25	13	7385	7337	48	17232	57	105	106
HG002_y2_DCv1.2_PHv6_mm2_model1_dockerv0.8_HPRC_GQ	SNP	AllTandemRepeatsandHomopolymers_slop5	1	0.999752	0.999876	0	1	3915	3915	0	10240	1	1	106
HG002_y2_DCv1.2_PHv6_mm2_model1_dockerv0.8_HPRC_GQ	INDEL	lowmappabilityall	1	0.973333	0.986486	0	0	149	149	0	1096	4	4	21
HG002_y2_DCv1.2_PHv6_mm2_model1_dockerv0.8_HPRC_GQ	SNP	lowmappabilityall	0.999231	0.994273	0.996746	2	0	2602	2600	2	5646	15	17	21
HG002_y2_DCv1.2_PHv6_mm2_model1_dockerv0.8_HPRC_GQ	INDEL	nonunique_l100_m2_e1	1	0.973333	0.986486	0	0	149	149	0	1094	4	4	21
HG002_y2_DCv1.2_PHv6_mm2_model1_dockerv0.8_HPRC_GQ	SNP	nonunique_l100_m2_e1	0.999231	0.994273	0.996746	2	0	2602	2600	2	5635	15	17	21
HG002_y2_DCv1.2_PHv6_mm2_model1_dockerv0.8_HPRC_GQ	INDEL	nonunique_l250_m0_e0	1	1	1	0	0	2	2	0	116	0	0	0
HG002_y2_DCv1.2_PHv6_mm2_model1_dockerv0.8_HPRC_GQ	SNP	nonunique_l250_m0_e0	1	1	1	0	0	159	159	0	476	0	0	0
HG002_y2_DCv1.2_PHv6_mm2_model1_dockerv0.8_HPRC_GQ	INDEL	notinalldifficultregions	0.998513	0.99762	0.998066	2	0	3362	3357	5	3876	8	13	16
HG002_y2_DCv1.2_PHv6_mm2_model1_dockerv0.8_HPRC_GQ	SNP	notinalldifficultregions	0.999967	0.999983	0.999975	1	0	60232	60230	2	62314	1	3	16
HG002_y2_DCv1.2_PHv6_mm2_model1_dockerv0.8_HPRC_GQ	INDEL	notinAllHomopolymers_ge7bp_imperfectge11bp_slop5	0.997446	0.994279	0.99586	6	7	6264	6248	16	10543	37	53	95
HG002_y2_DCv1.2_PHv6_mm2_model1_dockerv0.8_HPRC_GQ	SNP	notinAllHomopolymers_ge7bp_imperfectge11bp_slop5	0.999942	0.999449	0.999695	3	0	68859	68855	4	78906	38	42	95
HG002_y2_DCv1.2_PHv6_mm2_model1_dockerv0.8_HPRC_GQ	INDEL	notinalllowmapandsegdupregions	0.995149	0.993641	0.994394	27	15	10925	10872	53	19998	72	125	132
HG002_y2_DCv1.2_PHv6_mm2_model1_dockerv0.8_HPRC_GQ	SNP	notinalllowmapandsegdupregions	0.99997	0.999926	0.999948	1	1	67324	67322	2	73827	5	7	132
HG002_y2_DCv1.2_PHv6_mm2_model1_dockerv0.8_HPRC_GQ	INDEL	notinallTandemRepeats	0.995075	0.992612	0.993842	23	10	8731	8688	43	15787	66	109	152
HG002_y2_DCv1.2_PHv6_mm2_model1_dockerv0.8_HPRC_GQ	SNP	notinallTandemRepeats	0.999942	0.999436	0.999689	3	1	69018	69014	4	75870	39	43	152
HG002_y2_DCv1.2_PHv6_mm2_model1_dockerv0.8_HPRC_GQ	INDEL	notinAllTandemRepeatsandHomopolymers_slop5	0.998684	0.993696	0.996184	2	2	3800	3795	5	4541	24	29	71
HG002_y2_DCv1.2_PHv6_mm2_model1_dockerv0.8_HPRC_GQ	SNP	notinAllTandemRepeatsandHomopolymers_slop5	0.99994	0.999433	0.999687	3	0	66981	66977	4	72268	38	42	71
HG002_y2_DCv1.2_PHv6_mm2_model1_dockerv0.8_HPRC_GQ	INDEL	notinlowmappabilityall	0.995193	0.993261	0.994226	27	15	11025	10972	53	20675	77	130	156
HG002_y2_DCv1.2_PHv6_mm2_model1_dockerv0.8_HPRC_GQ	SNP	notinlowmappabilityall	0.999971	0.999649	0.99981	1	1	68294	68292	2	76862	24	26	156
HG002_y2_DCv1.2_PHv6_mm2_model1_dockerv0.8_HPRC_GQ	INDEL	notinrefseq_cds	0.995254	0.993428	0.994341	27	15	11168	11115	53	21683	76	129	171
HG002_y2_DCv1.2_PHv6_mm2_model1_dockerv0.8_HPRC_GQ	SNP	notinrefseq_cds	0.999943	0.999461	0.999702	3	1	70365	70361	4	81944	38	42	171
HG002_y2_DCv1.2_PHv6_mm2_model1_dockerv0.8_HPRC_GQ	INDEL	notinsatellites_slop5	0.995259	0.993178	0.994218	27	15	11180	11127	53	21594	79	132	175
HG002_y2_DCv1.2_PHv6_mm2_model1_dockerv0.8_HPRC_GQ	SNP	notinsatellites_slop5	0.999944	0.999451	0.999697	3	1	70879	70875	4	81284	39	43	175
HG002_y2_DCv1.2_PHv6_mm2_model1_dockerv0.8_HPRC_GQ	INDEL	notinsegdups	0.99521	0.993629	0.994419	27	15	11064	11011	53	20739	73	126	133
HG002_y2_DCv1.2_PHv6_mm2_model1_dockerv0.8_HPRC_GQ	SNP	notinsegdups	0.999971	0.999928	0.99995	1	1	69611	69609	2	77323	5	7	133
HG002_y2_DCv1.2_PHv6_mm2_model1_dockerv0.8_HPRC_GQ	INDEL	notinsegdups_gt10kb	0.995221	0.993643	0.994431	27	15	11090	11037	53	20878	73	126	133
HG002_y2_DCv1.2_PHv6_mm2_model1_dockerv0.8_HPRC_GQ	SNP	notinsegdups_gt10kb	0.999971	0.999929	0.99995	1	1	69837	69835	2	77725	5	7	133
HG002_y2_DCv1.2_PHv6_mm2_model1_dockerv0.8_HPRC_GQ	INDEL	refseq_cds	1	0.785714	0.88	0	0	11	11	0	19	3	3	4
HG002_y2_DCv1.2_PHv6_mm2_model1_dockerv0.8_HPRC_GQ	SNP	refseq_cds	1	0.99812	0.999059	0	0	531	531	0	564	1	1	4
HG002_y2_DCv1.2_PHv6_mm2_model1_dockerv0.8_HPRC_GQ	INDEL	satellites_slop5	0			0	0	0	0	0	113	0	0	0
HG002_y2_DCv1.2_PHv6_mm2_model1_dockerv0.8_HPRC_GQ	SNP	satellites_slop5	1	1	1	0	0	17	17	0	1224	0	0	0
HG002_y2_DCv1.2_PHv6_mm2_model1_dockerv0.8_HPRC_GQ	INDEL	segdups	1	0.950413	0.974576	0	0	116	116	0	966	6	6	42
HG002_y2_DCv1.2_PHv6_mm2_model1_dockerv0.8_HPRC_GQ	SNP	segdups	0.998444	0.974301	0.986224	2	0	1285	1283	2	5185	34	36	42
HG002_y2_DCv1.2_PHv6_mm2_model1_dockerv0.8_HPRC_GQ	INDEL	segdups_gt10kb	1	0.9375	0.967742	0	0	90	90	0	826	6	6	42
HG002_y2_DCv1.2_PHv6_mm2_model1_dockerv0.8_HPRC_GQ	SNP	segdups_gt10kb	0.998111	0.968921	0.9833	2	0	1059	1057	2	4783	34	36	42
HG002_y2_DCv1.2_PHv6_mm2_model1_dockerv0.8_HPRC_GQ	INDEL	SimpleRepeat_diTR_10to49_slop5	0.993445	0.991333	0.992388	5	6	1373	1364	9	2806	13	22	23
HG002_y2_DCv1.2_PHv6_mm2_model1_dockerv0.8_HPRC_GQ	SNP	SimpleRepeat_diTR_10to49_slop5	1	0.997792	0.998895	0	1	416	416	0	1305	1	1	23
HG002_y2_DCv1.2_PHv6_mm2_model1_dockerv0.8_HPRC_GQ	INDEL	SimpleRepeat_diTR_50to149_slop5	0.888889	0.894737	0.891803	1	1	27	24	3	163	4	7	7
HG002_y2_DCv1.2_PHv6_mm2_model1_dockerv0.8_HPRC_GQ	SNP	SimpleRepeat_diTR_50to149_slop5	1	1	1	0	0	1	1	0	53	0	0	7
HG002_y2_DCv1.2_PHv6_mm2_model1_dockerv0.8_HPRC_GQ	INDEL	SimpleRepeat_diTR_ge150_slop5	0	0		0	0	0	0	0	0	0	0	0
HG002_y2_DCv1.2_PHv6_mm2_model1_dockerv0.8_HPRC_GQ	SNP	SimpleRepeat_diTR_ge150_slop5	0	0		0	0	0	0	0	0	0	0	0
HG002_y2_DCv1.2_PHv6_mm2_model1_dockerv0.8_HPRC_GQ	INDEL	SimpleRepeat_homopolymer_4to6_slop5	0.99662	0.994395	0.995506	3	1	2959	2949	10	5052	17	27	40
HG002_y2_DCv1.2_PHv6_mm2_model1_dockerv0.8_HPRC_GQ	SNP	SimpleRepeat_homopolymer_4to6_slop5	0.999941	0.99929	0.999615	1	0	16852	16851	1	19567	12	13	40
HG002_y2_DCv1.2_PHv6_mm2_model1_dockerv0.8_HPRC_GQ	INDEL	SimpleRepeat_homopolymer_7to11_slop5	0.994377	0.995779	0.995077	5	2	2134	2122	12	2992	9	21	22
HG002_y2_DCv1.2_PHv6_mm2_model1_dockerv0.8_HPRC_GQ	SNP	SimpleRepeat_homopolymer_7to11_slop5	1	0.999337	0.999668	0	1	1469	1469	0	2021	1	1	22
HG002_y2_DCv1.2_PHv6_mm2_model1_dockerv0.8_HPRC_GQ	INDEL	SimpleRepeat_homopolymer_ge12_slop5	0.989649	0.988256	0.988952	17	6	2705	2677	28	8170	34	62	62
HG002_y2_DCv1.2_PHv6_mm2_model1_dockerv0.8_HPRC_GQ	SNP	SimpleRepeat_homopolymer_ge12_slop5	1	1	1	0	0	317	317	0	1218	0	0	62
HG002_y2_DCv1.2_PHv6_mm2_model1_dockerv0.8_HPRC_GQ	INDEL	SimpleRepeat_homopolymer_ge21_slop5	0.994083	0.985915	0.989982	1	2	169	168	1	2899	3	4	4
HG002_y2_DCv1.2_PHv6_mm2_model1_dockerv0.8_HPRC_GQ	SNP	SimpleRepeat_homopolymer_ge21_slop5	1	1	1	0	0	17	17	0	317	0	0	4
HG002_y2_DCv1.2_PHv6_mm2_model1_dockerv0.8_HPRC_GQ	INDEL	TS_boundary	0.996894	0.991758	0.99432	0	1	322	321	1	1194	3	4	4
HG002_y2_DCv1.2_PHv6_mm2_model1_dockerv0.8_HPRC_GQ	SNP	TS_boundary	1	1	1	0	0	1	1	0	238	0	0	4
HG002_y2_DCv1.2_PHv6_mm2_model1_dockerv0.8_HPRC_GQ	INDEL	TS_contained	0.995211	0.993224	0.994216	27	14	10858	10806	52	11216	76	128	171
HG002_y2_DCv1.2_PHv6_mm2_model1_dockerv0.8_HPRC_GQ	SNP	TS_contained	0.999944	0.999451	0.999697	3	1	70895	70891	4	71047	39	43	171
HG002_y2_unpolished	INDEL	alldifficultregions	0.981581	0.982032	0.981806	83	27	7818	7674	144	17851	147	291	337
HG002_y2_unpolished	SNP	alldifficultregions	0.999437	0.996303	0.997868	4	1	10664	10658	6	20716	40	46	337
HG002_y2_unpolished	INDEL	AllHomopolymers_ge7bp_imperfectge11bp_slop5	0.987844	0.988297	0.988071	31	9	4936	4876	60	11293	60	120	122
HG002_y2_unpolished	SNP	AllHomopolymers_ge7bp_imperfectge11bp_slop5	0.999509	0.999523	0.999516	1	0	2037	2036	1	3600	1	2	122
HG002_y2_unpolished	INDEL	alllowmapandsegdupregions	1	0.972332	0.985972	0	0	250	250	0	1803	7	7	43
HG002_y2_unpolished	SNP	alllowmapandsegdupregions	0.99944	0.990592	0.994996	2	0	3572	3570	2	9212	34	36	43
HG002_y2_unpolished	INDEL	AllTandemRepeats	0.965503	0.972613	0.969045	52	16	2464	2379	85	6012	72	157	162
HG002_y2_unpolished	SNP	AllTandemRepeats	0.998403	0.99896	0.998681	1	1	1878	1875	3	7162	2	5	162
HG002_y2_unpolished	INDEL	AllTandemRepeats_201to10000bp_slop5	0.971774	0.979757	0.975749	4	0	248	241	7	1785	5	12	12
HG002_y2_unpolished	SNP	AllTandemRepeats_201to10000bp_slop5	1	1	1	0	0	530	530	0	2958	0	0	12
HG002_y2_unpolished	INDEL	AllTandemRepeats_51to200bp_slop5	0.957627	0.965379	0.961488	17	8	708	678	30	1814	26	56	57
HG002_y2_unpolished	SNP	AllTandemRepeats_51to200bp_slop5	1	0.99845	0.999224	0	1	620	620	0	1435	1	1	57
HG002_y2_unpolished	INDEL	AllTandemRepeats_ge10001bp_slop5	0			0	0	0	0	0	261	0	0	0
HG002_y2_unpolished	SNP	AllTandemRepeats_ge10001bp_slop5	0			0	0	0	0	0	1757	0	0	0
HG002_y2_unpolished	INDEL	AllTandemRepeats_ge101bp_slop5	0.968421	0.97314	0.970775	9	3	475	460	15	2793	13	28	29
HG002_y2_unpolished	SNP	AllTandemRepeats_ge101bp_slop5	1	0.998718	0.999359	0	1	770	770	0	5402	1	1	29
HG002_y2_unpolished	INDEL	AllTandemRepeats_le50bp_slop5	0.96817	0.974862	0.971504	31	8	1508	1460	48	2164	41	89	93
HG002_y2_unpolished	SNP	AllTandemRepeats_le50bp_slop5	0.995879	0.998661	0.997268	1	0	728	725	3	1012	1	4	93
HG002_y2_unpolished	INDEL	AllTandemRepeatsandHomopolymers_slop5	0.980501	0.98295	0.981724	83	25	7385	7241	144	17197	132	276	283
HG002_y2_unpolished	SNP	AllTandemRepeatsandHomopolymers_slop5	0.998978	0.999254	0.999116	2	1	3915	3911	4	10762	3	7	283
HG002_y2_unpolished	INDEL	lowmappabilityall	1	0.973333	0.986486	0	0	149	149	0	1131	4	4	21
HG002_y2_unpolished	SNP	lowmappabilityall	0.999231	0.994273	0.996746	2	0	2602	2600	2	6177	15	17	21
HG002_y2_unpolished	INDEL	nonunique_l100_m2_e1	1	0.973333	0.986486	0	0	149	149	0	1129	4	4	21
HG002_y2_unpolished	SNP	nonunique_l100_m2_e1	0.999231	0.994273	0.996746	2	0	2602	2600	2	6166	15	17	21
HG002_y2_unpolished	INDEL	nonunique_l250_m0_e0	1	1	1	0	0	2	2	0	141	0	0	0
HG002_y2_unpolished	SNP	nonunique_l250_m0_e0	1	1	1	0	0	159	159	0	833	0	0	0
HG002_y2_unpolished	INDEL	notinalldifficultregions	0.993159	0.993744	0.993452	12	1	3362	3339	23	3871	21	44	57
HG002_y2_unpolished	SNP	notinalldifficultregions	0.999851	0.999934	0.999892	3	0	60232	60223	9	62310	4	13	57
HG002_y2_unpolished	INDEL	notinAllHomopolymers_ge7bp_imperfectge11bp_slop5	0.982759	0.982898	0.982828	64	19	6264	6156	108	10518	110	218	275
HG002_y2_unpolished	SNP	notinAllHomopolymers_ge7bp_imperfectge11bp_slop5	0.999797	0.999376	0.999587	6	1	68859	68845	14	79426	43	57	275
HG002_y2_unpolished	INDEL	notinalllowmapandsegdupregions	0.984714	0.985727	0.98522	95	28	10925	10758	167	19925	161	328	351
HG002_y2_unpolished	SNP	notinalllowmapandsegdupregions	0.999807	0.999852	0.999829	5	1	67324	67311	13	73814	10	23	351
HG002_y2_unpolished	INDEL	notinallTandemRepeats	0.990494	0.989241	0.989867	43	12	8731	8648	83	15769	96	179	233
HG002_y2_unpolished	SNP	notinallTandemRepeats	0.999826	0.999392	0.999609	6	0	69018	69006	12	75864	42	54	233
HG002_y2_unpolished	INDEL	notinAllTandemRepeatsandHomopolymers_slop5	0.993947	0.990008	0.991974	12	3	3800	3777	23	4537	38	61	113
HG002_y2_unpolished	SNP	notinAllTandemRepeatsandHomopolymers_slop5	0.999836	0.999388	0.999612	5	0	66981	66970	11	72264	41	52	113
HG002_y2_unpolished	INDEL	notinlowmappabilityall	0.984853	0.985418	0.985135	95	28	11025	10858	167	20601	166	333	375
HG002_y2_unpolished	SNP	notinlowmappabilityall	0.99981	0.999576	0.999693	5	1	68294	68281	13	76849	29	42	375
HG002_y2_unpolished	INDEL	notinrefseq_cds	0.985136	0.985682	0.985409	95	28	11168	11002	166	21645	165	331	389
HG002_y2_unpolished	SNP	notinrefseq_cds	0.999787	0.99939	0.999589	7	1	70365	70350	15	82462	43	58	389
HG002_y2_unpolished	INDEL	notinsatellites_slop5	0.985063	0.985439	0.985251	95	28	11180	11013	167	21512	168	335	394
HG002_y2_unpolished	SNP	notinsatellites_slop5	0.999788	0.999381	0.999584	7	1	70879	70864	15	81262	44	59	394
HG002_y2_unpolished	INDEL	notinsegdups	0.984906	0.985811	0.985358	95	28	11064	10897	167	20702	162	329	352
HG002_y2_unpolished	SNP	notinsegdups	0.999813	0.999857	0.999835	5	1	69611	69598	13	77841	10	23	352
HG002_y2_unpolished	INDEL	notinsegdups_gt10kb	0.984941	0.985842	0.985391	95	28	11090	10923	167	20840	162	329	352
HG002_y2_unpolished	SNP	notinsegdups_gt10kb	0.999814	0.999857	0.999835	5	1	69837	69824	13	78243	10	23	352
HG002_y2_unpolished	INDEL	refseq_cds	0.909091	0.769231	0.833333	0	0	11	10	1	18	3	4	5
HG002_y2_unpolished	SNP	refseq_cds	1	0.99812	0.999059	0	0	531	531	0	564	1	1	5
HG002_y2_unpolished	INDEL	satellites_slop5	0			0	0	0	0	0	156	0	0	0
HG002_y2_unpolished	SNP	satellites_slop5	1	1	1	0	0	17	17	0	1764	0	0	0
HG002_y2_unpolished	INDEL	segdups	1	0.950413	0.974576	0	0	116	116	0	964	6	6	42
HG002_y2_unpolished	SNP	segdups	0.998444	0.974301	0.986224	2	0	1285	1283	2	5185	34	36	42
HG002_y2_unpolished	INDEL	segdups_gt10kb	1	0.9375	0.967742	0	0	90	90	0	825	6	6	42
HG002_y2_unpolished	SNP	segdups_gt10kb	0.998111	0.968921	0.9833	2	0	1059	1057	2	4783	34	36	42
HG002_y2_unpolished	INDEL	SimpleRepeat_diTR_10to49_slop5	0.959213	0.966239	0.962713	36	12	1373	1317	56	2777	50	106	110
HG002_y2_unpolished	SNP	SimpleRepeat_diTR_10to49_slop5	0.995192	0.995575	0.995384	1	1	416	414	2	1296	2	4	110
HG002_y2_unpolished	INDEL	SimpleRepeat_diTR_50to149_slop5	0.777778	0.763158	0.770398	3	4	27	21	6	160	9	15	15
HG002_y2_unpolished	SNP	SimpleRepeat_diTR_50to149_slop5	1	1	1	0	0	1	1	0	52	0	0	15
HG002_y2_unpolished	INDEL	SimpleRepeat_diTR_ge150_slop5	0	0		0	0	0	0	0	0	0	0	0
HG002_y2_unpolished	SNP	SimpleRepeat_diTR_ge150_slop5	0	0		0	0	0	0	0	0	0	0	0
HG002_y2_unpolished	INDEL	SimpleRepeat_homopolymer_4to6_slop5	0.985468	0.986428	0.985948	25	2	2959	2916	43	5038	41	84	100
HG002_y2_unpolished	SNP	SimpleRepeat_homopolymer_4to6_slop5	0.999881	0.999171	0.999526	1	1	16852	16850	2	19703	14	16	100
HG002_y2_unpolished	INDEL	SimpleRepeat_homopolymer_7to11_slop5	0.990159	0.992488	0.991322	11	1	2134	2113	21	2989	16	37	39
HG002_y2_unpolished	SNP	SimpleRepeat_homopolymer_7to11_slop5	0.999319	0.999336	0.999328	1	0	1469	1468	1	2019	1	2	39
HG002_y2_unpolished	INDEL	SimpleRepeat_homopolymer_ge12_slop5	0.985582	0.985472	0.985527	20	8	2705	2666	39	8160	42	81	81
HG002_y2_unpolished	SNP	SimpleRepeat_homopolymer_ge12_slop5	1	1	1	0	0	317	317	0	1218	0	0	81
HG002_y2_unpolished	INDEL	SimpleRepeat_homopolymer_ge21_slop5	0.988166	0.981221	0.984681	1	3	169	167	2	2896	4	6	6
HG002_y2_unpolished	SNP	SimpleRepeat_homopolymer_ge21_slop5	1	1	1	0	0	17	17	0	316	0	0	6
HG002_y2_unpolished	INDEL	TS_boundary	0.978261	0.977839	0.97805	4	2	322	315	7	1187	8	15	15
HG002_y2_unpolished	SNP	TS_boundary	1	1	1	0	0	1	1	0	238	0	0	15
HG002_y2_unpolished	INDEL	TS_contained	0.985264	0.985685	0.985475	91	26	10858	10698	160	11177	160	320	379
HG002_y2_unpolished	SNP	TS_contained	0.999788	0.999381	0.999584	7	1	70895	70880	15	71040	44	59	379
HG005_deepvariant	INDEL	alldifficultregions	0.97796	0.978314	0.978137	3517	1320	260890	255140	5750	786180	5895	11645	20562
HG005_deepvariant	SNP	alldifficultregions	0.994457	0.989884	0.992166	1821	215	565797	562661	3136	979003	5781	8917	20562
HG005_deepvariant	INDEL	AllHomopolymers_ge7bp_imperfectge11bp_slop5	0.985627	0.987785	0.986705	1085	254	141311	139280	2031	506716	1758	3789	4484
HG005_deepvariant	SNP	AllHomopolymers_ge7bp_imperfectge11bp_slop5	0.996424	0.995122	0.995772	241	18	81366	81075	291	168067	404	695	4484
HG005_deepvariant	INDEL	alllowmapandsegdupregions	0.983838	0.9757	0.979752	91	33	15840	15584	256	81069	387	643	7272
HG005_deepvariant	SNP	alllowmapandsegdupregions	0.991231	0.982627	0.98691	1049	105	251914	249705	2209	459205	4420	6629	7272
HG005_deepvariant	INDEL	AllTandemRepeats	0.962367	0.962166	0.962266	2352	1057	91914	88455	3459	246960	3798	7257	7958
HG005_deepvariant	SNP	AllTandemRepeats	0.996372	0.993202	0.994785	198	87	66149	65909	240	278117	461	701	7958
HG005_deepvariant	INDEL	AllTandemRepeats_201to10000bp_slop5	0.985432	0.986212	0.985822	31	11	4050	3991	59	60178	57	116	226
HG005_deepvariant	SNP	AllTandemRepeats_201to10000bp_slop5	0.995063	0.9941	0.994581	37	2	10128	10078	50	105479	60	110	226
HG005_deepvariant	INDEL	AllTandemRepeats_51to200bp_slop5	0.959882	0.956973	0.958425	746	393	27444	26343	1101	84068	1288	2389	2626
HG005_deepvariant	SNP	AllTandemRepeats_51to200bp_slop5	0.997106	0.993549	0.995324	64	38	24878	24806	72	63561	165	237	2626
HG005_deepvariant	INDEL	AllTandemRepeats_ge10001bp_slop5	1	1	1	0	0	8	8	0	4209	0	0	1
HG005_deepvariant	SNP	AllTandemRepeats_ge10001bp_slop5	1	0.994975	0.997481	0	0	198	198	0	62122	1	1	1
HG005_deepvariant	INDEL	AllTandemRepeats_ge101bp_slop5	0.974953	0.975271	0.975112	182	83	12137	11833	304	96966	313	617	787
HG005_deepvariant	SNP	AllTandemRepeats_ge101bp_slop5	0.996333	0.995073	0.995703	56	9	19635	19563	72	195602	98	170	787
HG005_deepvariant	INDEL	AllTandemRepeats_le50bp_slop5	0.961945	0.963006	0.962475	1575	653	60413	58114	2299	98798	2453	4752	5105
HG005_deepvariant	SNP	AllTandemRepeats_le50bp_slop5	0.996187	0.992627	0.994404	97	47	30945	30827	118	46955	235	353	5105
HG005_deepvariant	INDEL	AllTandemRepeatsandHomopolymers_slop5	0.976493	0.977321	0.976907	3425	1302	232867	227393	5474	749179	5532	11006	12402
HG005_deepvariant	SNP	AllTandemRepeatsandHomopolymers_slop5	0.9964	0.994258	0.995328	439	105	147515	146984	531	446173	865	1396	12402
HG005_deepvariant	INDEL	lowmappabilityall	0.985388	0.972626	0.978965	53	18	9444	9306	138	55991	260	398	5057
HG005_deepvariant	SNP	lowmappabilityall	0.992511	0.982684	0.987573	837	66	186398	185002	1396	362498	3263	4659	5057
HG005_deepvariant	INDEL	nonunique_l100_m2_e1	0.985388	0.972626	0.978965	53	18	9444	9306	138	55982	260	398	5057
HG005_deepvariant	SNP	nonunique_l100_m2_e1	0.992511	0.982684	0.987573	837	66	186398	185002	1396	362472	3263	4659	5057
HG005_deepvariant	INDEL	nonunique_l250_m0_e0	0.937824	0.916096	0.926833	14	4	579	543	36	9753	49	85	1259
HG005_deepvariant	SNP	nonunique_l250_m0_e0	0.955113	0.945696	0.950381	245	16	11763	11235	528	60655	646	1174	1259
HG005_deepvariant	INDEL	notinalldifficultregions	0.993073	0.994641	0.993856	437	62	154028	152961	1067	179561	823	1890	18653
HG005_deepvariant	SNP	notinalldifficultregions	0.99735	0.996414	0.996882	5752	156	2686298	2679178	7120	2813072	9643	16763	18653
HG005_deepvariant	INDEL	notinAllHomopolymers_ge7bp_imperfectge11bp_slop5	0.982471	0.982317	0.982394	2881	1140	274119	269314	4805	462997	4987	9792	34777
HG005_deepvariant	SNP	notinAllHomopolymers_ge7bp_imperfectge11bp_slop5	0.996857	0.995273	0.996065	7332	353	3170729	3160764	9965	3624020	15020	24985	34777
HG005_deepvariant	INDEL	notinalllowmapandsegdupregions	0.983565	0.984538	0.984051	3860	1349	398657	392105	6552	884757	6325	12877	31928
HG005_deepvariant	SNP	notinalllowmapandsegdupregions	0.997318	0.99634	0.996828	6524	266	3000181	2992134	8047	3332866	11004	19051	31928
HG005_deepvariant	INDEL	notinallTandemRepeats	0.989582	0.990969	0.990275	1613	333	323286	319918	3368	721286	2938	6306	31285
HG005_deepvariant	SNP	notinallTandemRepeats	0.996856	0.995313	0.996084	7375	284	3185946	3175930	10016	3513963	14963	24979	31285
HG005_deepvariant	INDEL	notinAllTandemRepeatsandHomopolymers_slop5	0.992607	0.993458	0.993032	530	82	182333	180985	1348	217192	1189	2537	26821
HG005_deepvariant	SNP	notinAllTandemRepeatsandHomopolymers_slop5	0.996868	0.995319	0.996092	7134	266	3104580	3094855	9725	3345903	14559	24284	26821
HG005_deepvariant	INDEL	notinlowmappabilityall	0.983534	0.984484	0.984009	3895	1364	404953	398285	6668	909853	6445	13113	34134
HG005_deepvariant	SNP	notinlowmappabilityall	0.99711	0.996042	0.996575	6736	305	3065697	3056837	8860	3429578	12161	21021	34134
HG005_deepvariant	INDEL	notinrefseq_cds	0.983582	0.984244	0.983913	3950	1382	414361	407558	6803	962599	6694	13497	38936
HG005_deepvariant	SNP	notinrefseq_cds	0.996849	0.995291	0.99607	7522	369	3231773	3221591	10182	3768931	15257	25439	38936
HG005_deepvariant	INDEL	notinsatellites_slop5	0.983576	0.984208	0.983892	3952	1382	414525	407717	6808	959033	6712	13520	39145
HG005_deepvariant	SNP	notinsatellites_slop5	0.996854	0.995273	0.996063	7552	371	3249548	3239324	10224	3728144	15401	25625	39145
HG005_deepvariant	INDEL	notinsegdups	0.983673	0.984659	0.984166	3885	1354	404780	398171	6609	914062	6368	12977	32799
HG005_deepvariant	SNP	notinsegdups	0.99733	0.996354	0.996842	6757	277	3134811	3126440	8371	3550435	11451	19822	32799
HG005_deepvariant	INDEL	notinsegdups_gt10kb	0.983699	0.984695	0.984197	3890	1356	406295	399672	6623	919825	6376	12999	32875
HG005_deepvariant	SNP	notinsegdups_gt10kb	0.997337	0.996363	0.99685	6773	277	3151125	3142733	8392	3575748	11484	19876	32875
HG005_deepvariant	INDEL	refseq_cds	0.980226	0.94837	0.964035	3	0	354	347	7	742	19	26	267
HG005_deepvariant	SNP	refseq_cds	0.996359	0.991821	0.994085	51	2	20322	20248	74	23138	167	241	267
HG005_deepvariant	INDEL	satellites_slop5	0.994845	1	0.997416	0	0	194	193	1	4298	0	1	56
HG005_deepvariant	SNP	satellites_slop5	0.987436	0.990941	0.989186	21	0	2547	2515	32	63925	23	55	56
HG005_deepvariant	INDEL	segdups	0.979865	0.965941	0.972853	67	28	9933	9733	200	49279	344	544	6402
HG005_deepvariant	SNP	segdups	0.983928	0.966763	0.97527	816	94	117284	115399	1885	241634	3973	5858	6402
HG005_deepvariant	INDEL	segdups_gt10kb	0.977912	0.960967	0.969365	62	26	8421	8235	186	43480	336	522	6326
HG005_deepvariant	SNP	segdups_gt10kb	0.981539	0.961815	0.971577	800	94	100970	99106	1864	216321	3940	5804	6326
HG005_deepvariant	INDEL	SimpleRepeat_diTR_10to49_slop5	0.957948	0.95727	0.957609	1566	766	54266	51984	2282	133378	2571	4853	5093
HG005_deepvariant	SNP	SimpleRepeat_diTR_10to49_slop5	0.996254	0.990364	0.9933	62	55	17085	17021	64	62908	176	240	5093
HG005_deepvariant	INDEL	SimpleRepeat_diTR_50to149_slop5	0.845194	0.809318	0.826867	91	86	801	677	124	7095	221	345	357
HG005_deepvariant	SNP	SimpleRepeat_diTR_50to149_slop5	0.848485	0.851064	0.849772	3	3	33	28	5	2160	7	12	357
HG005_deepvariant	INDEL	SimpleRepeat_diTR_ge150_slop5	0			0	0	0	0	0	4	0	0	0
HG005_deepvariant	SNP	SimpleRepeat_diTR_ge150_slop5	0	0		0	0	0	0	0	0	0	0	0
HG005_deepvariant	INDEL	SimpleRepeat_homopolymer_4to6_slop5	0.985787	0.986822	0.986304	882	299	119676	117975	1701	224533	1595	3296	9536
HG005_deepvariant	SNP	SimpleRepeat_homopolymer_4to6_slop5	0.996944	0.995367	0.996155	1839	101	810255	807779	2476	936579	3764	6240	9536
HG005_deepvariant	INDEL	SimpleRepeat_homopolymer_7to11_slop5	0.988121	0.990751	0.989434	530	86	92603	91503	1100	145172	857	1957	2476
HG005_deepvariant	SNP	SimpleRepeat_homopolymer_7to11_slop5	0.996626	0.995272	0.995949	170	13	63426	63212	214	97892	305	519	2476
HG005_deepvariant	INDEL	SimpleRepeat_homopolymer_ge12_slop5	0.980776	0.982074	0.981425	496	147	42968	42142	826	355281	813	1639	1725
HG005_deepvariant	SNP	SimpleRepeat_homopolymer_ge12_slop5	0.993964	0.991717	0.992839	39	5	5799	5764	35	52696	51	86	1725
HG005_deepvariant	INDEL	SimpleRepeat_homopolymer_ge21_slop5	0.973475	0.965347	0.969394	8	4	377	367	10	123850	14	24	27
HG005_deepvariant	SNP	SimpleRepeat_homopolymer_ge21_slop5	0.993631	0.988166	0.990891	1	1	157	156	1	15039	2	3	27
HG005_deepvariant	INDEL	TS_boundary	0.978889	0.974455	0.976667	159	124	12458	12195	263	49091	348	611	625
HG005_deepvariant	SNP	TS_boundary	0.957746	0.963576	0.960652	7	2	71	68	3	7020	11	14	625
HG005_deepvariant	INDEL	TS_contained	0.983727	0.984538	0.984132	3793	1258	402259	395713	6546	411590	6364	12910	38576
HG005_deepvariant	SNP	TS_contained	0.996847	0.995272	0.996059	7566	369	3252024	3241771	10253	3260264	15413	25666	38576
HG005_nextPolish2	INDEL	alldifficultregions	0.976231	0.96259	0.969363	3683	1502	260890	254689	6201	792048	10320	16521	29834
HG005_nextPolish2	SNP	alldifficultregions	0.989281	0.987285	0.988282	2376	413	565797	559732	6065	979586	7248	13313	29834
HG005_nextPolish2	INDEL	AllHomopolymers_ge7bp_imperfectge11bp_slop5	0.98555	0.964251	0.974784	1124	636	141311	139269	2042	511857	5272	7314	7936
HG005_nextPolish2	SNP	AllHomopolymers_ge7bp_imperfectge11bp_slop5	0.996768	0.995665	0.996216	138	58	81366	81103	263	168168	359	622	7936
HG005_nextPolish2	INDEL	alllowmapandsegdupregions	0.958018	0.905549	0.931044	258	152	15840	15175	665	82870	1578	2243	14003
HG005_nextPolish2	SNP	alllowmapandsegdupregions	0.978822	0.974634	0.976723	2029	242	251914	246579	5335	460150	6425	11760	14003
HG005_nextPolish2	INDEL	AllTandemRepeats	0.96141	0.963115	0.962261	2354	758	91914	88367	3547	246928	3696	7243	8040
HG005_nextPolish2	SNP	AllTandemRepeats	0.994875	0.993236	0.994055	166	112	66149	65810	339	280217	458	797	8040
HG005_nextPolish2	INDEL	AllTandemRepeats_201to10000bp_slop5	0.978025	0.957613	0.967711	48	35	4050	3961	89	60859	179	268	506
HG005_nextPolish2	SNP	AllTandemRepeats_201to10000bp_slop5	0.987954	0.988575	0.988264	53	8	10128	10006	122	105298	116	238	506
HG005_nextPolish2	INDEL	AllTandemRepeats_51to200bp_slop5	0.955728	0.955497	0.955613	799	288	27444	26229	1215	83770	1328	2543	2848
HG005_nextPolish2	SNP	AllTandemRepeats_51to200bp_slop5	0.995498	0.99245	0.993972	63	65	24878	24766	112	63460	193	305	2848
HG005_nextPolish2	INDEL	AllTandemRepeats_ge10001bp_slop5	1	1	1	0	0	8	8	0	4137	0	0	0
HG005_nextPolish2	SNP	AllTandemRepeats_ge10001bp_slop5	1	1	1	0	0	198	198	0	64588	0	0	0
HG005_nextPolish2	INDEL	AllTandemRepeats_ge101bp_slop5	0.968032	0.962006	0.96501	219	94	12137	11749	388	97514	484	872	1235
HG005_nextPolish2	SNP	AllTandemRepeats_ge101bp_slop5	0.990935	0.990689	0.990812	82	28	19635	19457	178	197836	185	363	1235
HG005_nextPolish2	INDEL	AllTandemRepeats_le50bp_slop5	0.962872	0.966899	0.964881	1507	435	60413	58170	2243	98463	2189	4432	4686
HG005_nextPolish2	SNP	AllTandemRepeats_le50bp_slop5	0.996607	0.995315	0.99596	50	39	30945	30840	105	46871	149	254	4686
HG005_nextPolish2	INDEL	AllTandemRepeatsandHomopolymers_slop5	0.976038	0.963788	0.969874	3473	1389	232867	227287	5580	754286	8955	14535	15954
HG005_nextPolish2	SNP	AllTandemRepeatsandHomopolymers_slop5	0.995919	0.994572	0.995245	304	170	147515	146913	602	448374	817	1419	15954
HG005_nextPolish2	INDEL	lowmappabilityall	0.946845	0.88178	0.913155	201	109	9444	8942	502	57429	1190	1692	11175
HG005_nextPolish2	SNP	lowmappabilityall	0.976727	0.972541	0.97463	1802	187	186398	182060	4338	363648	5145	9483	11175
HG005_nextPolish2	INDEL	nonunique_l100_m2_e1	0.946845	0.88178	0.913155	201	109	9444	8942	502	57420	1190	1692	11175
HG005_nextPolish2	SNP	nonunique_l100_m2_e1	0.976727	0.972541	0.97463	1802	187	186398	182060	4338	363622	5145	9483	11175
HG005_nextPolish2	INDEL	nonunique_l250_m0_e0	0.920553	0.867769	0.893382	12	8	579	533	46	9869	80	126	1521
HG005_nextPolish2	SNP	nonunique_l250_m0_e0	0.938791	0.94247	0.940627	276	16	11763	11043	720	61531	675	1395	1521
HG005_nextPolish2	INDEL	notinalldifficultregions	0.987905	0.938356	0.962493	732	910	154028	152165	1863	188244	9982	11845	28247
HG005_nextPolish2	SNP	notinalldifficultregions	0.996563	0.99733	0.996946	3739	271	2686298	2677064	9234	2808326	7168	16402	28247
HG005_nextPolish2	INDEL	notinAllHomopolymers_ge7bp_imperfectge11bp_slop5	0.978006	0.948193	0.962869	3293	1790	274119	268090	6029	472440	15070	21099	50192
HG005_nextPolish2	SNP	notinAllHomopolymers_ge7bp_imperfectge11bp_slop5	0.995258	0.995568	0.995413	5977	626	3170729	3155693	15036	3619756	14057	29093	50192
HG005_nextPolish2	INDEL	notinalllowmapandsegdupregions	0.981465	0.955498	0.968308	4153	2259	398657	391268	7389	897483	18721	26110	44065
HG005_nextPolish2	SNP	notinalllowmapandsegdupregions	0.996679	0.997337	0.997008	4086	442	3000181	2990217	9964	3327758	7991	17955	44065
HG005_nextPolish2	INDEL	notinallTandemRepeats	0.986031	0.950782	0.968086	2062	1659	323286	318770	4516	735896	16632	21148	50066
HG005_nextPolish2	SNP	notinallTandemRepeats	0.995304	0.99562	0.995462	5949	572	3185946	3170986	14960	3507700	13958	28918	50066
HG005_nextPolish2	INDEL	notinAllTandemRepeatsandHomopolymers_slop5	0.986366	0.940366	0.962817	941	1033	182333	179847	2486	226669	11379	13865	42161
HG005_nextPolish2	SNP	notinAllTandemRepeatsandHomopolymers_slop5	0.995266	0.995619	0.995442	5811	514	3104580	3089883	14697	3339539	13599	28296	42161
HG005_nextPolish2	INDEL	notinlowmappabilityall	0.981353	0.955282	0.968142	4208	2304	404953	397402	7551	922937	19104	26655	46887
HG005_nextPolish2	SNP	notinlowmappabilityall	0.996425	0.996977	0.996701	4313	497	3065697	3054736	10961	3424265	9271	20232	46887
HG005_nextPolish2	INDEL	notinrefseq_cds	0.980587	0.953596	0.966903	4405	2412	414361	406317	8044	977170	20290	28334	57875
HG005_nextPolish2	SNP	notinrefseq_cds	0.995282	0.99558	0.995431	6095	682	3231773	3216527	15246	3764740	14295	29541	57875
HG005_nextPolish2	INDEL	notinsatellites_slop5	0.980587	0.953563	0.966887	4408	2413	414525	406478	8047	973593	20313	28360	57979
HG005_nextPolish2	SNP	notinsatellites_slop5	0.995309	0.99558	0.995444	6085	684	3249548	3234304	15244	3721592	14375	29619	57979
HG005_nextPolish2	INDEL	notinsegdups	0.980846	0.954393	0.967439	4298	2339	404780	397027	7753	927733	19480	27233	49953
HG005_nextPolish2	SNP	notinsegdups	0.995949	0.996804	0.996376	5172	543	3134811	3122111	12700	3546586	10020	22720	49953
HG005_nextPolish2	INDEL	notinsegdups_gt10kb	0.980849	0.954432	0.96746	4313	2344	406295	398514	7781	933579	19533	27314	50169
HG005_nextPolish2	SNP	notinsegdups_gt10kb	0.995948	0.996799	0.996374	5198	547	3151125	3138357	12768	3571879	10087	22855	50169
HG005_nextPolish2	INDEL	refseq_cds	0.983051	0.930851	0.956239	4	1	354	348	6	759	26	32	206
HG005_nextPolish2	SNP	refseq_cds	0.997392	0.994067	0.995727	20	2	20322	20269	53	23166	121	174	206
HG005_nextPolish2	INDEL	satellites_slop5	0.984536	0.984536	0.984536	1	0	194	191	3	4325	3	6	102
HG005_nextPolish2	SNP	satellites_slop5	0.978406	0.98382	0.981106	30	0	2547	2492	55	66314	41	96	102
HG005_nextPolish2	INDEL	segdups	0.9701	0.92032	0.944555	111	74	9933	9636	297	50196	836	1133	8128
HG005_nextPolish2	SNP	segdups	0.97784	0.963133	0.970431	943	141	117284	114685	2599	241320	4396	6995	8128
HG005_nextPolish2	INDEL	segdups_gt10kb	0.968056	0.91268	0.939553	96	69	8421	8152	269	44313	783	1052	7912
HG005_nextPolish2	SNP	segdups_gt10kb	0.974933	0.957932	0.966358	917	137	100970	98439	2531	216027	4329	6860	7912
HG005_nextPolish2	INDEL	SimpleRepeat_diTR_10to49_slop5	0.958132	0.96108	0.959604	1518	556	54266	51994	2272	133051	2334	4606	4847
HG005_nextPolish2	SNP	SimpleRepeat_diTR_10to49_slop5	0.996078	0.990469	0.993266	48	74	17085	17018	67	62951	174	241	4847
HG005_nextPolish2	INDEL	SimpleRepeat_diTR_50to149_slop5	0.850187	0.832891	0.84145	82	64	801	681	120	7010	189	309	318
HG005_nextPolish2	SNP	SimpleRepeat_diTR_50to149_slop5	0.878788	0.891304	0.885002	2	2	33	29	4	2139	5	9	318
HG005_nextPolish2	INDEL	SimpleRepeat_diTR_ge150_slop5	0			0	0	0	0	0	3	0	0	0
HG005_nextPolish2	SNP	SimpleRepeat_diTR_ge150_slop5	0	0		0	0	0	0	0	0	0	0	0
HG005_nextPolish2	INDEL	SimpleRepeat_homopolymer_4to6_slop5	0.981776	0.92293	0.951444	1128	1058	119676	117495	2181	233713	9935	12116	18583
HG005_nextPolish2	SNP	SimpleRepeat_homopolymer_4to6_slop5	0.995972	0.996051	0.996011	1298	178	810255	806991	3264	935842	3203	6467	18583
HG005_nextPolish2	INDEL	SimpleRepeat_homopolymer_7to11_slop5	0.986761	0.95644	0.971364	649	494	92603	91377	1226	149909	4176	5402	5878
HG005_nextPolish2	SNP	SimpleRepeat_homopolymer_7to11_slop5	0.996831	0.995736	0.996283	95	44	63426	63225	201	97957	275	476	5878
HG005_nextPolish2	INDEL	SimpleRepeat_homopolymer_ge12_slop5	0.98436	0.982855	0.983607	392	117	42968	42296	672	355420	780	1452	1519
HG005_nextPolish2	SNP	SimpleRepeat_homopolymer_ge12_slop5	0.995861	0.993021	0.994439	20	12	5799	5775	24	52794	43	67	1519
HG005_nextPolish2	INDEL	SimpleRepeat_homopolymer_ge21_slop5	0.97878	0.963145	0.970899	6	7	377	369	8	123455	15	23	23
HG005_nextPolish2	SNP	SimpleRepeat_homopolymer_ge21_slop5	1	1	1	0	0	157	157	0	15102	0	0	23
HG005_nextPolish2	INDEL	TS_boundary	0.977061	0.97557	0.976315	152	79	12424	12139	285	48826	331	616	643
HG005_nextPolish2	SNP	TS_boundary	0.939024	0.931677	0.935336	9	11	82	77	5	7136	22	27	643
HG005_nextPolish2	INDEL	TS_contained	0.980698	0.952874	0.966586	4257	2334	402293	394528	7765	424077	19985	27750	57438
HG005_nextPolish2	SNP	TS_contained	0.995297	0.995577	0.995437	6106	673	3252013	3236719	15294	3254191	14394	29688	57438
HG005_t2t_polish	INDEL	alldifficultregions	0.977205	0.98106	0.979129	3610	806	260890	254943	5947	783845	5130	11077	21483
HG005_t2t_polish	SNP	alldifficultregions	0.991472	0.990202	0.990837	1876	207	565797	560972	4825	978604	5581	10406	21483
HG005_t2t_polish	INDEL	AllHomopolymers_ge7bp_imperfectge11bp_slop5	0.987382	0.991674	0.989523	961	93	141311	139528	1783	505589	1196	2979	3675
HG005_t2t_polish	SNP	AllHomopolymers_ge7bp_imperfectge11bp_slop5	0.994949	0.996549	0.995748	177	7	81366	80955	411	167707	285	696	3675
HG005_t2t_polish	INDEL	alllowmapandsegdupregions	0.978283	0.97193	0.975096	141	35	15840	15496	344	81113	446	790	8891
HG005_t2t_polish	SNP	alllowmapandsegdupregions	0.986345	0.981608	0.983971	1326	106	251914	248474	3440	460151	4661	8101	8891
HG005_t2t_polish	INDEL	AllTandemRepeats	0.958592	0.964658	0.961615	2516	692	91914	88108	3806	245745	3524	7330	8354
HG005_t2t_polish	SNP	AllTandemRepeats	0.992154	0.992528	0.992341	260	83	66149	65630	519	280523	505	1024	8354
HG005_t2t_polish	INDEL	AllTandemRepeats_201to10000bp_slop5	0.979506	0.983483	0.981491	50	8	4050	3967	83	60045	68	151	390
HG005_t2t_polish	SNP	AllTandemRepeats_201to10000bp_slop5	0.986967	0.989441	0.988203	64	7	10128	9996	132	105180	107	239	390
HG005_t2t_polish	INDEL	AllTandemRepeats_51to200bp_slop5	0.954671	0.959945	0.957301	812	245	27444	26200	1244	83338	1188	2432	2796
HG005_t2t_polish	SNP	AllTandemRepeats_51to200bp_slop5	0.992966	0.992588	0.992777	96	31	24878	24703	175	63301	189	364	2796
HG005_t2t_polish	INDEL	AllTandemRepeats_ge10001bp_slop5	1	1	1	0	0	8	8	0	4475	0	0	2
HG005_t2t_polish	SNP	AllTandemRepeats_ge10001bp_slop5	0.994949	0.994949	0.994949	1	0	198	197	1	65221	1	2	2
HG005_t2t_polish	INDEL	AllTandemRepeats_ge101bp_slop5	0.969185	0.976666	0.972911	218	44	12137	11763	374	96822	293	667	1039
HG005_t2t_polish	SNP	AllTandemRepeats_ge101bp_slop5	0.989763	0.991378	0.99057	104	14	19635	19434	201	198276	171	372	1039
HG005_t2t_polish	INDEL	AllTandemRepeats_le50bp_slop5	0.958966	0.965599	0.962271	1654	439	60413	57934	2479	98180	2268	4747	5166
HG005_t2t_polish	SNP	AllTandemRepeats_le50bp_slop5	0.993181	0.993449	0.993315	99	45	30945	30734	211	46821	208	419	5166
HG005_t2t_polish	INDEL	AllTandemRepeatsandHomopolymers_slop5	0.976034	0.980595	0.978309	3474	783	232867	227286	5581	746905	4715	10296	12016
HG005_t2t_polish	SNP	AllTandemRepeatsandHomopolymers_slop5	0.993696	0.994739	0.994217	437	90	147515	146585	930	448219	790	1720	12016
HG005_t2t_polish	INDEL	lowmappabilityall	0.97967	0.96877	0.974189	83	21	9444	9252	192	56090	296	488	6036
HG005_t2t_polish	SNP	lowmappabilityall	0.987993	0.98236	0.985169	991	66	186398	184160	2238	363885	3310	5548	6036
HG005_t2t_polish	INDEL	nonunique_l100_m2_e1	0.97967	0.96877	0.974189	83	21	9444	9252	192	56081	296	488	6036
HG005_t2t_polish	SNP	nonunique_l100_m2_e1	0.987993	0.98236	0.985169	991	66	186398	184160	2238	363860	3310	5548	6036
HG005_t2t_polish	INDEL	nonunique_l250_m0_e0	0.930915	0.918685	0.92476	14	4	579	539	40	9927	47	87	1356
HG005_t2t_polish	SNP	nonunique_l250_m0_e0	0.945082	0.947001	0.946041	246	14	11763	11117	646	62484	623	1269	1356
HG005_t2t_polish	INDEL	notinalldifficultregions	0.989482	0.992099	0.990789	654	95	154028	152408	1620	179431	1212	2832	20539
HG005_t2t_polish	SNP	notinalldifficultregions	0.995882	0.997523	0.996702	4346	117	2686298	2675236	11062	2805956	6645	17707	20539
HG005_t2t_polish	INDEL	notinAllHomopolymers_ge7bp_imperfectge11bp_slop5	0.978867	0.981678	0.98027	3304	813	274119	268326	5793	461595	5151	10944	38361
HG005_t2t_polish	SNP	notinAllHomopolymers_ge7bp_imperfectge11bp_slop5	0.995119	0.996232	0.995675	6045	317	3170729	3155253	15476	3616865	11941	27417	38361
HG005_t2t_polish	INDEL	notinalllowmapandsegdupregions	0.981902	0.985562	0.983728	4122	866	398657	391442	7215	882194	5890	13105	33117
HG005_t2t_polish	SNP	notinalllowmapandsegdupregions	0.995851	0.997477	0.996663	4896	218	3000181	2987734	12447	3324405	7565	20012	33117
HG005_t2t_polish	INDEL	notinallTandemRepeats	0.988363	0.991328	0.989844	1748	210	323286	319524	3762	719975	2817	6579	33668
HG005_t2t_polish	SNP	notinallTandemRepeats	0.995176	0.996319	0.995747	5962	241	3185946	3170578	15368	3504042	11721	27089	33668
HG005_t2t_polish	INDEL	notinAllTandemRepeatsandHomopolymers_slop5	0.989091	0.991033	0.990061	788	120	182333	180344	1989	216998	1628	3617	30010
HG005_t2t_polish	SNP	notinAllTandemRepeatsandHomopolymers_slop5	0.995182	0.996313	0.995747	5785	234	3104580	3089623	14957	3336342	11436	26393	30010
HG005_t2t_polish	INDEL	notinlowmappabilityall	0.981808	0.985432	0.983616	4179	880	404953	397586	7367	907228	6035	13402	35967
HG005_t2t_polish	SNP	notinlowmappabilityall	0.995548	0.99709	0.996318	5231	258	3065697	3052048	13649	3420676	8916	22565	35967
HG005_t2t_polish	INDEL	notinrefseq_cds	0.981782	0.9851	0.983438	4257	900	414361	406812	7549	960147	6313	13862	41736
HG005_t2t_polish	SNP	notinrefseq_cds	0.995114	0.99626	0.995687	6184	323	3231773	3215984	15789	3761481	12085	27874	41736
HG005_t2t_polish	INDEL	notinsatellites_slop5	0.981772	0.985059	0.983413	4260	901	414525	406969	7556	956300	6333	13889	41922
HG005_t2t_polish	SNP	notinsatellites_slop5	0.995126	0.996247	0.995686	6196	324	3249548	3233710	15838	3717509	12195	28033	41922
HG005_t2t_polish	INDEL	notinsegdups	0.981961	0.985627	0.983791	4158	875	404780	397478	7302	911700	5950	13252	34282
HG005_t2t_polish	SNP	notinsegdups	0.995824	0.997466	0.996644	5168	226	3134811	3121721	13090	3544631	7940	21030	34282
HG005_t2t_polish	INDEL	notinsegdups_gt10kb	0.981971	0.985638	0.983801	4171	877	406295	398970	7325	917447	5967	13292	34546
HG005_t2t_polish	SNP	notinsegdups_gt10kb	0.995803	0.997451	0.996626	5229	226	3151125	3137899	13226	3569870	8028	21254	34546
HG005_t2t_polish	INDEL	refseq_cds	0.974576	0.940379	0.957172	4	1	354	345	9	742	22	31	270
HG005_t2t_polish	SNP	refseq_cds	0.995178	0.993077	0.994126	38	1	20322	20224	98	23073	141	239	270
HG005_t2t_polish	INDEL	satellites_slop5	0.989691	0.989691	0.989691	1	0	194	192	2	4577	2	4	84
HG005_t2t_polish	SNP	satellites_slop5	0.980762	0.987747	0.984242	26	0	2547	2498	49	67045	31	80	84
HG005_t2t_polish	INDEL	segdups	0.974227	0.961798	0.967973	103	26	9933	9677	256	49189	385	641	7724
HG005_t2t_polish	SNP	segdups	0.976152	0.963964	0.97002	1054	98	117284	114487	2797	239923	4286	7083	7724
HG005_t2t_polish	INDEL	segdups_gt10kb	0.972331	0.957135	0.964673	90	24	8421	8188	233	43406	368	601	7460
HG005_t2t_polish	SNP	segdups_gt10kb	0.973646	0.959102	0.966319	993	98	100970	98309	2661	214684	4198	6859	7460
HG005_t2t_polish	INDEL	SimpleRepeat_diTR_10to49_slop5	0.955479	0.961188	0.958325	1604	538	54266	51850	2416	132518	2320	4736	5011
HG005_t2t_polish	SNP	SimpleRepeat_diTR_10to49_slop5	0.993035	0.991423	0.992228	70	48	17085	16966	119	62726	156	275	5011
HG005_t2t_polish	INDEL	SimpleRepeat_diTR_50to149_slop5	0.841448	0.825509	0.833403	85	64	801	674	127	6999	197	324	334
HG005_t2t_polish	SNP	SimpleRepeat_diTR_50to149_slop5	0.878788	0.87234	0.875552	2	2	33	29	4	2150	6	10	334
HG005_t2t_polish	INDEL	SimpleRepeat_diTR_ge150_slop5	0			0	0	0	0	0	3	0	0	0
HG005_t2t_polish	SNP	SimpleRepeat_diTR_ge150_slop5	0	0		0	0	0	0	0	0	0	0	0
HG005_t2t_polish	INDEL	SimpleRepeat_homopolymer_4to6_slop5	0.983004	0.986156	0.984577	1084	216	119677	117643	2034	224208	1672	3706	10790
HG005_t2t_polish	SNP	SimpleRepeat_homopolymer_4to6_slop5	0.995019	0.996237	0.995628	1557	90	810255	806219	4036	934706	3048	7084	10790
HG005_t2t_polish	INDEL	SimpleRepeat_homopolymer_7to11_slop5	0.988942	0.993126	0.99103	514	35	92603	91579	1024	145028	636	1660	2166
HG005_t2t_polish	SNP	SimpleRepeat_homopolymer_7to11_slop5	0.995239	0.996829	0.996033	123	4	63426	63124	302	97689	204	506	2166
HG005_t2t_polish	INDEL	SimpleRepeat_homopolymer_ge12_slop5	0.98585	0.990094	0.987968	356	44	42968	42360	608	354320	448	1056	1108
HG005_t2t_polish	SNP	SimpleRepeat_homopolymer_ge12_slop5	0.996206	0.995122	0.995664	23	3	5799	5777	22	52638	30	52	1108
HG005_t2t_polish	INDEL	SimpleRepeat_homopolymer_ge21_slop5	0.981432	0.98005	0.980741	5	3	377	370	7	123146	8	15	15
HG005_t2t_polish	SNP	SimpleRepeat_homopolymer_ge21_slop5	1	1	1	0	0	157	157	0	15028	0	0	15
HG005_t2t_polish	INDEL	TS_boundary	0.979546	0.980301	0.979923	144	53	12418	12164	254	48460	266	520	534
HG005_t2t_polish	SNP	TS_boundary	0.985915	0.957792	0.97165	5	6	71	70	1	6987	13	14	534
HG005_t2t_polish	INDEL	TS_contained	0.981844	0.985218	0.983528	4117	848	402299	394995	7304	410558	6069	13373	41472
HG005_t2t_polish	SNP	TS_contained	0.995115	0.996244	0.995679	6217	318	3252024	3236138	15886	3251431	12213	28099	41472
HG005_y2_DCv1.2_PHv6_mm2_model1_dockerv0.8_HPRC_GQ	INDEL	alldifficultregions	0.990851	0.990013	0.990431	1450	662	260890	258503	2387	787721	2722	5109	10376
HG005_y2_DCv1.2_PHv6_mm2_model1_dockerv0.8_HPRC_GQ	SNP	alldifficultregions	0.997137	0.993612	0.995371	588	133	565797	564177	1620	980290	3647	5267	10376
HG005_y2_DCv1.2_PHv6_mm2_model1_dockerv0.8_HPRC_GQ	INDEL	AllHomopolymers_ge7bp_imperfectge11bp_slop5	0.99356	0.995383	0.994471	490	71	141311	140401	910	507058	665	1575	1642
HG005_y2_DCv1.2_PHv6_mm2_model1_dockerv0.8_HPRC_GQ	SNP	AllHomopolymers_ge7bp_imperfectge11bp_slop5	0.999828	0.99936	0.999594	14	3	81366	81352	14	168071	53	67	1642
HG005_y2_DCv1.2_PHv6_mm2_model1_dockerv0.8_HPRC_GQ	INDEL	alllowmapandsegdupregions	0.989899	0.979949	0.984899	44	27	15840	15680	160	81305	320	480	5569
HG005_y2_DCv1.2_PHv6_mm2_model1_dockerv0.8_HPRC_GQ	SNP	alllowmapandsegdupregions	0.993815	0.986108	0.989947	543	89	251914	250356	1558	460750	3531	5089	5569
HG005_y2_DCv1.2_PHv6_mm2_model1_dockerv0.8_HPRC_GQ	INDEL	AllTandemRepeats	0.985399	0.982479	0.983937	927	571	91914	90572	1342	248076	1768	3110	3301
HG005_y2_DCv1.2_PHv6_mm2_model1_dockerv0.8_HPRC_GQ	SNP	AllTandemRepeats	0.999017	0.998138	0.998578	41	41	66149	66084	65	280084	126	191	3301
HG005_y2_DCv1.2_PHv6_mm2_model1_dockerv0.8_HPRC_GQ	INDEL	AllTandemRepeats_201to10000bp_slop5	0.99679	0.9959	0.996345	7	6	4050	4037	13	60299	17	30	88
HG005_y2_DCv1.2_PHv6_mm2_model1_dockerv0.8_HPRC_GQ	SNP	AllTandemRepeats_201to10000bp_slop5	0.99684	0.997439	0.99714	20	1	10128	10096	32	105306	26	58	88
HG005_y2_DCv1.2_PHv6_mm2_model1_dockerv0.8_HPRC_GQ	INDEL	AllTandemRepeats_51to200bp_slop5	0.984368	0.979351	0.981853	287	218	27444	27015	429	84544	622	1051	1108
HG005_y2_DCv1.2_PHv6_mm2_model1_dockerv0.8_HPRC_GQ	SNP	AllTandemRepeats_51to200bp_slop5	0.999558	0.998198	0.998878	10	19	24878	24867	11	63578	46	57	1108
HG005_y2_DCv1.2_PHv6_mm2_model1_dockerv0.8_HPRC_GQ	INDEL	AllTandemRepeats_ge10001bp_slop5	1	1	1	0	0	8	8	0	4364	0	0	0
HG005_y2_DCv1.2_PHv6_mm2_model1_dockerv0.8_HPRC_GQ	SNP	AllTandemRepeats_ge10001bp_slop5	1	1	1	0	0	198	198	0	64293	0	0	0
HG005_y2_DCv1.2_PHv6_mm2_model1_dockerv0.8_HPRC_GQ	INDEL	AllTandemRepeats_ge101bp_slop5	0.992585	0.991108	0.991846	51	36	12137	12047	90	97390	113	203	273
HG005_y2_DCv1.2_PHv6_mm2_model1_dockerv0.8_HPRC_GQ	SNP	AllTandemRepeats_ge101bp_slop5	0.998167	0.998288	0.998227	23	6	19635	19599	36	197592	34	70	273
HG005_y2_DCv1.2_PHv6_mm2_model1_dockerv0.8_HPRC_GQ	INDEL	AllTandemRepeats_le50bp_slop5	0.985103	0.983055	0.984078	633	347	60413	59513	900	99162	1129	2029	2105
HG005_y2_DCv1.2_PHv6_mm2_model1_dockerv0.8_HPRC_GQ	SNP	AllTandemRepeats_le50bp_slop5	0.999289	0.998302	0.998795	11	21	30945	30923	22	46907	54	76	2105
HG005_y2_DCv1.2_PHv6_mm2_model1_dockerv0.8_HPRC_GQ	INDEL	AllTandemRepeatsandHomopolymers_slop5	0.990355	0.990068	0.990212	1414	641	232867	230621	2246	750647	2429	4675	4933
HG005_y2_DCv1.2_PHv6_mm2_model1_dockerv0.8_HPRC_GQ	SNP	AllTandemRepeatsandHomopolymers_slop5	0.999464	0.99881	0.999137	55	44	147515	147436	79	448143	179	258	4933
HG005_y2_DCv1.2_PHv6_mm2_model1_dockerv0.8_HPRC_GQ	INDEL	lowmappabilityall	0.990894	0.976153	0.983468	29	19	9444	9358	86	56184	227	313	3756
HG005_y2_DCv1.2_PHv6_mm2_model1_dockerv0.8_HPRC_GQ	SNP	lowmappabilityall	0.995284	0.98638	0.990812	443	53	186398	185519	879	364246	2564	3443	3756
HG005_y2_DCv1.2_PHv6_mm2_model1_dockerv0.8_HPRC_GQ	INDEL	nonunique_l100_m2_e1	0.990894	0.976153	0.983468	29	19	9444	9358	86	56175	227	313	3756
HG005_y2_DCv1.2_PHv6_mm2_model1_dockerv0.8_HPRC_GQ	SNP	nonunique_l100_m2_e1	0.995284	0.98638	0.990812	443	53	186398	185519	879	364220	2564	3443	3756
HG005_y2_DCv1.2_PHv6_mm2_model1_dockerv0.8_HPRC_GQ	INDEL	nonunique_l250_m0_e0	0.944732	0.919795	0.932097	12	5	579	547	32	9865	47	79	1178
HG005_y2_DCv1.2_PHv6_mm2_model1_dockerv0.8_HPRC_GQ	SNP	nonunique_l250_m0_e0	0.957749	0.949339	0.953526	221	14	11763	11266	497	62323	602	1099	1178
HG005_y2_DCv1.2_PHv6_mm2_model1_dockerv0.8_HPRC_GQ	INDEL	notinalldifficultregions	0.998202	0.997097	0.997649	142	47	154028	153751	277	180067	447	724	1378
HG005_y2_DCv1.2_PHv6_mm2_model1_dockerv0.8_HPRC_GQ	SNP	notinalldifficultregions	0.999847	0.99991	0.999878	141	16	2686298	2685886	412	2810336	242	654	1378
HG005_y2_DCv1.2_PHv6_mm2_model1_dockerv0.8_HPRC_GQ	INDEL	notinAllHomopolymers_ge7bp_imperfectge11bp_slop5	0.993572	0.991142	0.992355	1105	640	274119	272357	1762	464692	2507	4269	10123
HG005_y2_DCv1.2_PHv6_mm2_model1_dockerv0.8_HPRC_GQ	SNP	notinAllHomopolymers_ge7bp_imperfectge11bp_slop5	0.999364	0.998792	0.999078	715	146	3170729	3168711	2018	3622568	3836	5854	10123
HG005_y2_DCv1.2_PHv6_mm2_model1_dockerv0.8_HPRC_GQ	INDEL	notinalllowmapandsegdupregions	0.993714	0.993059	0.993386	1549	682	398657	396151	2506	886529	2847	5353	6185
HG005_y2_DCv1.2_PHv6_mm2_model1_dockerv0.8_HPRC_GQ	SNP	notinalllowmapandsegdupregions	0.999842	0.999881	0.999861	186	60	3000181	2999707	474	3329872	358	832	6185
HG005_y2_DCv1.2_PHv6_mm2_model1_dockerv0.8_HPRC_GQ	INDEL	notinallTandemRepeats	0.995889	0.995701	0.995795	668	138	323286	321957	1329	722207	1401	2730	8460
HG005_y2_DCv1.2_PHv6_mm2_model1_dockerv0.8_HPRC_GQ	SNP	notinallTandemRepeats	0.999383	0.99882	0.999101	688	108	3185946	3183979	1967	3510548	3763	5730	8460
HG005_y2_DCv1.2_PHv6_mm2_model1_dockerv0.8_HPRC_GQ	INDEL	notinAllTandemRepeatsandHomopolymers_slop5	0.997697	0.995939	0.996817	178	69	182333	181913	420	217768	740	1160	6823
HG005_y2_DCv1.2_PHv6_mm2_model1_dockerv0.8_HPRC_GQ	SNP	notinAllTandemRepeatsandHomopolymers_slop5	0.999371	0.998806	0.999088	674	105	3104580	3102627	1953	3342484	3710	5663	6823
HG005_y2_DCv1.2_PHv6_mm2_model1_dockerv0.8_HPRC_GQ	INDEL	notinlowmappabilityall	0.993626	0.99295	0.993288	1564	690	404953	402372	2581	911665	2936	5517	7995
HG005_y2_DCv1.2_PHv6_mm2_model1_dockerv0.8_HPRC_GQ	SNP	notinlowmappabilityall	0.999624	0.999568	0.999596	286	96	3065697	3064544	1153	3426381	1325	2478	7995
HG005_y2_DCv1.2_PHv6_mm2_model1_dockerv0.8_HPRC_GQ	INDEL	notinrefseq_cds	0.993571	0.992616	0.993093	1591	707	414361	411697	2664	964636	3145	5809	11605
HG005_y2_DCv1.2_PHv6_mm2_model1_dockerv0.8_HPRC_GQ	SNP	notinrefseq_cds	0.99938	0.998829	0.999104	720	148	3231773	3229768	2005	3767512	3791	5796	11605
HG005_y2_DCv1.2_PHv6_mm2_model1_dockerv0.8_HPRC_GQ	INDEL	notinsatellites_slop5	0.993573	0.992575	0.993074	1592	708	414525	411861	2664	960918	3164	5828	11704
HG005_y2_DCv1.2_PHv6_mm2_model1_dockerv0.8_HPRC_GQ	SNP	notinsatellites_slop5	0.999383	0.99881	0.999097	712	149	3249548	3247544	2004	3724532	3872	5876	11704
HG005_y2_DCv1.2_PHv6_mm2_model1_dockerv0.8_HPRC_GQ	INDEL	notinsegdups	0.993757	0.993123	0.99344	1555	685	404780	402253	2527	916024	2862	5389	6242
HG005_y2_DCv1.2_PHv6_mm2_model1_dockerv0.8_HPRC_GQ	SNP	notinsegdups	0.999846	0.999882	0.999864	189	61	3134811	3134329	482	3549432	371	853	6242
HG005_y2_DCv1.2_PHv6_mm2_model1_dockerv0.8_HPRC_GQ	INDEL	notinsegdups_gt10kb	0.993771	0.993139	0.993454	1558	686	406295	403764	2531	921784	2866	5397	6250
HG005_y2_DCv1.2_PHv6_mm2_model1_dockerv0.8_HPRC_GQ	SNP	notinsegdups_gt10kb	0.999847	0.999882	0.999865	189	61	3151125	3150643	482	3574717	371	853	6250
HG005_y2_DCv1.2_PHv6_mm2_model1_dockerv0.8_HPRC_GQ	INDEL	refseq_cds	0.997175	0.946667	0.971265	1	1	354	353	1	755	20	21	146
HG005_y2_DCv1.2_PHv6_mm2_model1_dockerv0.8_HPRC_GQ	SNP	refseq_cds	0.998671	0.995195	0.99693	9	1	20322	20295	27	23108	98	125	146
HG005_y2_DCv1.2_PHv6_mm2_model1_dockerv0.8_HPRC_GQ	INDEL	satellites_slop5	0.994845	1	0.997416	0	0	194	193	1	4460	0	1	46
HG005_y2_DCv1.2_PHv6_mm2_model1_dockerv0.8_HPRC_GQ	SNP	satellites_slop5	0.989007	0.993299	0.991148	17	0	2547	2519	28	66088	17	45	46
HG005_y2_DCv1.2_PHv6_mm2_model1_dockerv0.8_HPRC_GQ	INDEL	segdups	0.986107	0.970167	0.978072	37	23	9933	9795	138	49366	302	440	5508
HG005_y2_DCv1.2_PHv6_mm2_model1_dockerv0.8_HPRC_GQ	SNP	segdups	0.986784	0.97054	0.978595	540	88	117284	115734	1550	241188	3518	5068	5508
HG005_y2_DCv1.2_PHv6_mm2_model1_dockerv0.8_HPRC_GQ	INDEL	segdups_gt10kb	0.984087	0.965441	0.974675	34	22	8421	8287	134	43570	298	432	5500
HG005_y2_DCv1.2_PHv6_mm2_model1_dockerv0.8_HPRC_GQ	SNP	segdups_gt10kb	0.984649	0.96587	0.975169	540	88	100970	99420	1550	215903	3518	5068	5500
HG005_y2_DCv1.2_PHv6_mm2_model1_dockerv0.8_HPRC_GQ	INDEL	SimpleRepeat_diTR_10to49_slop5	0.979453	0.976461	0.977955	773	471	54266	53151	1115	133859	1423	2538	2605
HG005_y2_DCv1.2_PHv6_mm2_model1_dockerv0.8_HPRC_GQ	SNP	SimpleRepeat_diTR_10to49_slop5	0.999473	0.996817	0.998143	16	29	17085	17076	9	62975	58	67	2605
HG005_y2_DCv1.2_PHv6_mm2_model1_dockerv0.8_HPRC_GQ	INDEL	SimpleRepeat_diTR_50to149_slop5	0.893883	0.847328	0.869983	65	65	801	716	85	7199	180	265	269
HG005_y2_DCv1.2_PHv6_mm2_model1_dockerv0.8_HPRC_GQ	SNP	SimpleRepeat_diTR_50to149_slop5	0.969697	0.9375	0.953327	0	3	33	32	1	2188	3	4	269
HG005_y2_DCv1.2_PHv6_mm2_model1_dockerv0.8_HPRC_GQ	INDEL	SimpleRepeat_diTR_ge150_slop5	0			0	0	0	0	0	3	0	0	0
HG005_y2_DCv1.2_PHv6_mm2_model1_dockerv0.8_HPRC_GQ	SNP	SimpleRepeat_diTR_ge150_slop5	0	0		0	0	0	0	0	0	0	0	0
HG005_y2_DCv1.2_PHv6_mm2_model1_dockerv0.8_HPRC_GQ	INDEL	SimpleRepeat_homopolymer_4to6_slop5	0.994811	0.993681	0.994245	363	136	119676	119055	621	225116	767	1388	2827
HG005_y2_DCv1.2_PHv6_mm2_model1_dockerv0.8_HPRC_GQ	SNP	SimpleRepeat_homopolymer_4to6_slop5	0.999403	0.998823	0.999113	183	38	810255	809771	484	936307	955	1439	2827
HG005_y2_DCv1.2_PHv6_mm2_model1_dockerv0.8_HPRC_GQ	INDEL	SimpleRepeat_homopolymer_7to11_slop5	0.994514	0.996549	0.995531	240	26	92603	92095	508	145330	320	828	881
HG005_y2_DCv1.2_PHv6_mm2_model1_dockerv0.8_HPRC_GQ	SNP	SimpleRepeat_homopolymer_7to11_slop5	0.999795	0.999379	0.999587	7	3	63426	63413	13	97870	40	53	881
HG005_y2_DCv1.2_PHv6_mm2_model1_dockerv0.8_HPRC_GQ	INDEL	SimpleRepeat_homopolymer_ge12_slop5	0.9909	0.992811	0.991855	240	39	42968	42577	391	355371	326	717	726
HG005_y2_DCv1.2_PHv6_mm2_model1_dockerv0.8_HPRC_GQ	SNP	SimpleRepeat_homopolymer_ge12_slop5	0.999828	0.998699	0.999263	7	0	5799	5798	1	52742	8	9	726
HG005_y2_DCv1.2_PHv6_mm2_model1_dockerv0.8_HPRC_GQ	INDEL	SimpleRepeat_homopolymer_ge21_slop5	0.986737	0.987531	0.987134	3	2	377	372	5	123633	5	10	10
HG005_y2_DCv1.2_PHv6_mm2_model1_dockerv0.8_HPRC_GQ	SNP	SimpleRepeat_homopolymer_ge21_slop5	1	1	1	0	0	157	157	0	15077	0	0	10
HG005_y2_DCv1.2_PHv6_mm2_model1_dockerv0.8_HPRC_GQ	INDEL	TS_boundary	0.993719	0.990086	0.991899	51	44	12419	12341	78	48873	135	213	221
HG005_y2_DCv1.2_PHv6_mm2_model1_dockerv0.8_HPRC_GQ	SNP	TS_boundary	1	0.974026	0.986842	3	3	71	71	0	7037	8	8	221
HG005_y2_DCv1.2_PHv6_mm2_model1_dockerv0.8_HPRC_GQ	INDEL	TS_contained	0.993569	0.992661	0.993115	1541	664	402298	399711	2587	412705	3029	5616	11529
HG005_y2_DCv1.2_PHv6_mm2_model1_dockerv0.8_HPRC_GQ	SNP	TS_contained	0.999375	0.998808	0.999092	726	146	3252024	3249992	2032	3256984	3881	5913	11529
HG005_y2_unpolished	INDEL	alldifficultregions	0.978002	0.981451	0.979724	3515	825	260890	255151	5739	783386	5026	10765	16421
HG005_y2_unpolished	SNP	alldifficultregions	0.996789	0.993275	0.995029	703	173	565797	563980	1817	974968	3839	5656	16421
HG005_y2_unpolished	INDEL	AllHomopolymers_ge7bp_imperfectge11bp_slop5	0.987814	0.991912	0.989859	949	91	141311	139589	1722	505480	1162	2884	3044
HG005_y2_unpolished	SNP	AllHomopolymers_ge7bp_imperfectge11bp_slop5	0.999164	0.998888	0.999026	48	4	81366	81298	68	167901	92	160	3044
HG005_y2_unpolished	INDEL	alllowmapandsegdupregions	0.98327	0.97451	0.978871	103	39	15840	15575	265	80693	406	671	5867
HG005_y2_unpolished	SNP	alllowmapandsegdupregions	0.993549	0.985949	0.989735	573	91	251914	250289	1625	456015	3571	5196	5867
HG005_y2_unpolished	INDEL	AllTandemRepeats	0.959027	0.964973	0.961991	2487	704	91914	88148	3766	245287	3493	7259	7562
HG005_y2_unpolished	SNP	AllTandemRepeats	0.998488	0.997001	0.997744	68	75	66149	66049	100	274701	203	303	7562
HG005_y2_unpolished	INDEL	AllTandemRepeats_201to10000bp_slop5	0.982963	0.987363	0.985158	41	7	4050	3981	69	59949	52	121	180
HG005_y2_unpolished	SNP	AllTandemRepeats_201to10000bp_slop5	0.996643	0.997537	0.99709	19	1	10128	10094	34	105198	25	59	180
HG005_y2_unpolished	INDEL	AllTandemRepeats_51to200bp_slop5	0.954854	0.960053	0.957446	807	249	27444	26205	1239	83323	1185	2424	2528
HG005_y2_unpolished	SNP	AllTandemRepeats_51to200bp_slop5	0.999035	0.996867	0.99795	23	33	24878	24854	24	63385	80	104	2528
HG005_y2_unpolished	INDEL	AllTandemRepeats_ge10001bp_slop5	1	1	1	0	0	8	8	0	4124	0	0	0
HG005_y2_unpolished	SNP	AllTandemRepeats_ge10001bp_slop5	1	1	1	0	0	198	198	0	59233	0	0	0
HG005_y2_unpolished	INDEL	AllTandemRepeats_ge101bp_slop5	0.970915	0.978347	0.974617	205	42	12137	11784	353	96381	272	625	706
HG005_y2_unpolished	SNP	AllTandemRepeats_ge101bp_slop5	0.997861	0.998036	0.997949	25	8	19635	19593	42	192355	39	81	706
HG005_y2_unpolished	INDEL	AllTandemRepeats_le50bp_slop5	0.959313	0.965785	0.962538	1639	448	60413	57955	2458	98183	2256	4714	4854
HG005_y2_unpolished	SNP	AllTandemRepeats_le50bp_slop5	0.998643	0.996919	0.99778	26	41	30945	30903	42	46885	98	140	4854
HG005_y2_unpolished	INDEL	AllTandemRepeatsandHomopolymers_slop5	0.976467	0.980866	0.978661	3433	793	232867	227387	5480	746352	4650	10130	10593
HG005_y2_unpolished	SNP	AllTandemRepeatsandHomopolymers_slop5	0.998861	0.998039	0.99845	116	79	147515	147347	168	442591	295	463	10593
HG005_y2_unpolished	INDEL	lowmappabilityall	0.985705	0.97181	0.978708	58	26	9444	9309	135	55676	268	403	3935
HG005_y2_unpolished	SNP	lowmappabilityall	0.994989	0.986198	0.990574	469	54	186398	185464	934	359480	2598	3532	3935
HG005_y2_unpolished	INDEL	nonunique_l100_m2_e1	0.985705	0.97181	0.978708	58	26	9444	9309	135	55667	268	403	3935
HG005_y2_unpolished	SNP	nonunique_l100_m2_e1	0.994989	0.986198	0.990574	469	54	186398	185464	934	359454	2598	3532	3935
HG005_y2_unpolished	INDEL	nonunique_l250_m0_e0	0.941278	0.919521	0.930272	12	5	579	545	34	9645	47	81	1184
HG005_y2_unpolished	SNP	nonunique_l250_m0_e0	0.957494	0.949247	0.953352	222	14	11763	11263	500	59792	603	1103	1184
HG005_y2_unpolished	INDEL	notinalldifficultregions	0.992865	0.992965	0.992915	455	121	154028	152929	1099	179815	1082	2181	3874
HG005_y2_unpolished	SNP	notinalldifficultregions	0.999639	0.999731	0.999685	433	42	2686298	2685327	971	2809547	722	1693	3874
HG005_y2_unpolished	INDEL	notinAllHomopolymers_ge7bp_imperfectge11bp_slop5	0.981304	0.982419	0.981861	3023	860	274119	268994	5125	461616	4951	10076	17265
HG005_y2_unpolished	SNP	notinAllHomopolymers_ge7bp_imperfectge11bp_slop5	0.999142	0.998592	0.998867	1088	211	3170729	3168009	2720	3616626	4469	7189	17265
HG005_y2_unpolished	INDEL	notinalllowmapandsegdupregions	0.983532	0.986056	0.984792	3865	908	398657	392092	6565	882532	5695	12260	14413
HG005_y2_unpolished	SNP	notinalllowmapandsegdupregions	0.999612	0.99967	0.999641	563	124	3000181	2999018	1163	3328496	990	2153	14413
HG005_y2_unpolished	INDEL	notinallTandemRepeats	0.990494	0.991977	0.991235	1483	243	323286	320213	3073	720340	2610	5683	12729
HG005_y2_unpolished	SNP	notinallTandemRepeats	0.999156	0.998634	0.998895	1068	140	3185946	3183258	2688	3509819	4358	7046	12729
HG005_y2_unpolished	INDEL	notinAllTandemRepeatsandHomopolymers_slop5	0.99253	0.991984	0.992257	537	155	182333	180971	1362	217474	1459	2821	9707
HG005_y2_unpolished	SNP	notinAllTandemRepeatsandHomopolymers_slop5	0.999156	0.998627	0.998891	1020	136	3104580	3101960	2620	3341925	4266	6886	9707
HG005_y2_unpolished	INDEL	notinlowmappabilityall	0.983467	0.98595	0.984707	3909	921	404953	398258	6695	907563	5827	12522	16339
HG005_y2_unpolished	SNP	notinlowmappabilityall	0.999395	0.99936	0.999378	667	161	3065697	3063843	1854	3425036	1963	3817	16339
HG005_y2_unpolished	INDEL	notinrefseq_cds	0.983534	0.985681	0.984606	3963	945	414361	407538	6823	960061	6074	12897	20107
HG005_y2_unpolished	SNP	notinrefseq_cds	0.999148	0.998623	0.998886	1122	214	3231773	3229021	2752	3761458	4458	7210	20107
HG005_y2_unpolished	INDEL	notinsatellites_slop5	0.983531	0.985635	0.984582	3966	946	414525	407698	6827	956598	6096	12923	20225
HG005_y2_unpolished	SNP	notinsatellites_slop5	0.999151	0.998604	0.998877	1118	215	3249548	3246789	2759	3723574	4543	7302	20225
HG005_y2_unpolished	INDEL	notinsegdups	0.983653	0.986155	0.984902	3887	917	404780	398163	6617	911719	5738	12355	14590
HG005_y2_unpolished	SNP	notinsegdups	0.999613	0.999674	0.999644	580	126	3134811	3133599	1212	3543809	1023	2235	14590
HG005_y2_unpolished	INDEL	notinsegdups_gt10kb	0.983672	0.986176	0.984922	3896	919	406295	399661	6634	917445	5750	12384	14620
HG005_y2_unpolished	SNP	notinsegdups_gt10kb	0.999615	0.999676	0.999645	580	126	3151125	3149912	1213	3569094	1023	2236	14620
HG005_y2_unpolished	INDEL	refseq_cds	0.985876	0.936	0.960291	3	1	354	349	5	751	24	29	168
HG005_y2_unpolished	SNP	refseq_cds	0.998229	0.994949	0.996586	14	1	20322	20286	36	23051	103	139	168
HG005_y2_unpolished	INDEL	satellites_slop5	0.994845	0.994845	0.994845	0	0	194	193	1	4204	1	2	49
HG005_y2_unpolished	SNP	satellites_slop5	0.988614	0.992905	0.990755	18	0	2547	2518	29	60935	18	47	49
HG005_y2_unpolished	INDEL	segdups	0.978758	0.964445	0.971549	79	29	9933	9722	211	49093	359	570	5684
HG005_y2_unpolished	SNP	segdups	0.986563	0.970371	0.9784	556	89	117284	115708	1576	240700	3538	5114	5684
HG005_y2_unpolished	INDEL	segdups_gt10kb	0.976962	0.959665	0.968237	70	27	8421	8227	194	43331	347	541	5654
HG005_y2_unpolished	SNP	segdups_gt10kb	0.984401	0.965674	0.974948	556	89	100970	99395	1575	215415	3538	5113	5654
HG005_y2_unpolished	INDEL	SimpleRepeat_diTR_10to49_slop5	0.955681	0.961225	0.958445	1593	547	54266	51861	2405	132505	2318	4723	4840
HG005_y2_unpolished	SNP	SimpleRepeat_diTR_10to49_slop5	0.998654	0.994842	0.996744	26	46	17085	17062	23	62802	94	117	4840
HG005_y2_unpolished	INDEL	SimpleRepeat_diTR_50to149_slop5	0.8402	0.823738	0.831887	86	65	801	673	128	6997	199	327	336
HG005_y2_unpolished	SNP	SimpleRepeat_diTR_50to149_slop5	0.878788	0.891304	0.885002	2	2	33	29	4	2149	5	9	336
HG005_y2_unpolished	INDEL	SimpleRepeat_diTR_ge150_slop5	0			0	0	0	0	0	3	0	0	0
HG005_y2_unpolished	SNP	SimpleRepeat_diTR_ge150_slop5	0	0		0	0	0	0	0	0	0	0	0
HG005_y2_unpolished	INDEL	SimpleRepeat_homopolymer_4to6_slop5	0.984684	0.986513	0.985597	998	238	119677	117844	1833	224175	1631	3464	5232
HG005_y2_unpolished	SNP	SimpleRepeat_homopolymer_4to6_slop5	0.999193	0.998627	0.99891	264	61	810255	809601	654	934539	1114	1768	5232
HG005_y2_unpolished	INDEL	SimpleRepeat_homopolymer_7to11_slop5	0.989504	0.993398	0.991447	509	35	92603	91631	972	145014	611	1583	1712
HG005_y2_unpolished	SNP	SimpleRepeat_homopolymer_7to11_slop5	0.999101	0.998883	0.998992	33	4	63426	63369	57	97794	72	129	1712
HG005_y2_unpolished	INDEL	SimpleRepeat_homopolymer_ge12_slop5	0.985943	0.990249	0.988091	351	42	42968	42364	604	354211	441	1045	1061
HG005_y2_unpolished	SNP	SimpleRepeat_homopolymer_ge12_slop5	0.999138	0.998211	0.998674	11	0	5799	5794	5	52672	11	16	1061
HG005_y2_unpolished	INDEL	SimpleRepeat_homopolymer_ge21_slop5	0.981432	0.98005	0.980741	5	3	377	370	7	123101	8	15	15
HG005_y2_unpolished	SNP	SimpleRepeat_homopolymer_ge21_slop5	1	1	1	0	0	157	157	0	15054	0	0	15
HG005_y2_unpolished	INDEL	TS_boundary	0.980754	0.980613	0.980683	132	55	12418	12179	239	48391	262	501	515
HG005_y2_unpolished	SNP	TS_boundary	0.985915	0.957516	0.971508	5	6	71	70	1	6922	13	14	515
HG005_y2_unpolished	INDEL	TS_contained	0.983622	0.985804	0.984712	3834	891	402299	395710	6589	411039	5835	12424	19759
HG005_y2_unpolished	SNP	TS_contained	0.999143	0.998604	0.998873	1131	209	3252024	3249237	2787	3256866	4548	7335	19759

## Sheet: 5. centromere benchmarking
Dipcall variants against Q100. All censat regions, where MAPQ=60
	total	SNPs	indels	total bases	percent of censat bases with MAPQ=60
unpolished, mat	17906	13219	4789	243921318	0.891134
polished, mat	17619	13181	4539	243959712	0.891275
unpolished, pat	11501	7854	3727	270440101	0.894952
polished, pat	11258	7807	3534	270440328	0.894953
unpolished,dip	29407	21073	8516
polished,dip	28877	20988	8073
diff	530	85	443
Dipcall variants against Q100. Whole genome, where MAPQ=60
	total	SNPs	indels	total bases	percent of bases whole genome with MAPQ=60
unpolished, mat	40447	16730	23819	3021410749	0.990135
polished, mat	34454	15971	18584	3021449221	0.990148
unpolished, pat	32878	11070	21888	2914660588	0.988726
polished, pat	27131	10348	16866	2914661085	0.988726
unpolished,dip	73325	27800	45707
polished,dip	61585	26319	35450
diff	11740	1481	10257

## Sheet: 6. Gene Impact Analysis
A. Count of total gene-impacting mutations in each assembly
Assembly	Haplotype	Polisher	# Genes with frameshifts	# Genes with frameshifts validated by GIAB v4.2.1	# Genes with frameshifts NOT in GIAB v4.2.1	Percent of genes with frameshift validated by GIAB v4.2.1	# Genes with frameshift not in the GIAB v4.2.1 confidence region	# Genes with stop codon gained	# Genes with stop codon gained validated by GIAB v4.2.1	Percent of genes with stop codons validated by GIAB v4.2.1	# Genes with stop codon gained NOT in GIAB v4.2.1	# Genes with stop codon gained not in the GIAB v4.2.1 confidence region
HG002	Paternal	None	110	79	31	0.718182		36	29	0.805556	7
HG002	Paternal	DeepPolisher	109	81	28	0.743119	19	36	31	0.861111	5	5
HG002	Maternal	None	98	80	18	0.816327		50	36	0.72	14
HG002	Maternal	DeepPolisher	97	79	18	0.814433	16	50	37	0.74	13	11
HG005	Paternal	None	125	94	31	0.752		46	37	0.804348	9
HG005	Paternal	DeepPolisher	122	94	28	0.770492	19	45	36	0.8	9	7
HG005	Maternal	None	91	73	18	0.802198		57	46	0.807018	11
HG005	Maternal	DeepPolisher	91	74	17	0.813187	14	57	46	0.807018	11	9
					AVERAGE	0.778742		AVERAGE	0.793131
B. All transcripts with significant changes to gene models modified by edits made by DeepPolisher
HG002 haplotype 1
Transcripts	DNA Identity of Transcript in Polished Assembly Against Transcript in GRCh38	DNA Identity of Transcript in Raw Assembly Against Transcript in GRCh38	Protein Identity of Transcript in Polished Assembly Against Transcript in GRCh38	Protein Identity of Transcript in Raw Assembly Against Transcript in GRCh38	Identity improved by polishing?	If polishing decreases identity, why?	Significant impact to gene model?
ENST00000404933.7	0.369	0.428	0.264	0.212	YES		YES
ENST00000424120.6	0.999	0.999	0.999	0.261	YES		YES
ENST00000396203.7	1	0.981	1	0.981	YES		YES
HG002 haplotype 2
Transcripts	DNA Identity of Transcript in Polished Assembly Against Transcript in GRCh38	DNA Identity of Transcript in Raw Assembly Against Transcript in GRCh38	Protein Identity of Transcript in Polished Assembly Against Transcript in GRCh38	Protein Identity of Transcript in Raw Assembly Against Transcript in GRCh38	Identity improved by polishing?	If polishing decreases identity, why?	Significant impact to gene model?
ENST00000424120.6	0.999	0.999	1	0.261	YES		YES
HG005 haplotype 1
Transcripts	DNA Identity of Transcript in Polished Assembly Against Transcript in GRCh38	DNA Identity of Transcript in Raw Assembly Against Transcript in GRCh38	Protein Identity of Transcript in Polished Assembly Against Transcript in GRCh38	Protein Identity of Transcript in Raw Assembly Against Transcript in GRCh38	Identity improved by polishing?	If polishing decreases identity, why?	Significant impact to gene model?
ENST00000372371.8	1	0.996	1	0.259	YES		YES
ENST00000620267.2	0.996	0.995	0.724	0.978	NO	DeepPolisher edit inserts 7 bases and is consistently supported by several reads. The edit seems to be correct in this case, despite the decrease in identity.	YES
ENST00000295910.11	0.989	0.985	0.989	0.248	YES		YES
ENST00000316073.3	0.984	0.983	0.984	0.768	YES		YES
HG005 haplotype 2
Transcripts	DNA Identity of Transcript in Polished Assembly Against Transcript in GRCh38	DNA Identity of Transcript in Raw Assembly Against Transcript in GRCh38	Protein Identity of Transcript in Polished Assembly Against Transcript in GRCh38	Protein Identity of Transcript in Raw Assembly Against Transcript in GRCh38	Identity improved by polishing?	If polishing decreases identity, why?	Significant impact to gene model?
C. All transcripts modified by edits made by DeepPolisher
HG002 haplotype 1
Transcripts	DNA Identity of Transcript in Polished Assembly Against Transcript in GRCh38	DNA Identity of Transcript in Raw Assembly Against Transcript in GRCh38	Protein Identity of Transcript in Polished Assembly Against Transcript in GRCh38	Protein Identity of Transcript in Raw Assembly Against Transcript in GRCh38	Identity improved by polishing?	If polishing decreases identity, why?	Significant impact to gene model?
ENST00000373880.9	0.998	0.999	0.997	0.997	-
ENST00000404933.7	0.369	0.428	0.264	0.212	YES		YES
ENST00000424120.6	0.999	0.999	0.999	0.261	YES		YES
ENST00000396203.7	1	0.981	1	0.981	YES		YES
ENST00000320078.12	0.996	0.998	0.994	0.997	NO	Noisy reads
ENST00000391857.9	0.998	1	1	1	-
ENST00000381486.7	0.999	0.998	0.998	0.997	YES
ENST00000265348.9	1	0.999	1	0.999	YES
ENST00000423059.9	0.997	0.999	0.996	0.999	NO	reads support edit
ENST00000265846.10	1	0.999	1	0.997	YES
HG002 haplotype 2
Transcripts	DNA Identity of Transcript in Polished Assembly Against Transcript in GRCh38	DNA Identity of Transcript in Raw Assembly Against Transcript in GRCh38	Protein Identity of Transcript in Polished Assembly Against Transcript in GRCh38	Protein Identity of Transcript in Raw Assembly Against Transcript in GRCh38	Identity improved by polishing?	If polishing decreases identity, why?	Significant impact to gene model?
ENST00000271915.9	0.99	0.992	0.991	0.993	NO	Noisy reads
ENST00000449193.7	1	0.997	1	0.997	YES
ENST00000338971.10	0.998	1	1	1	-
ENST00000360423.12	1	0.998	1	1	-
ENST00000332715.6	1	0.988	1	0.988	YES
ENST00000374114.8	0.997	1	0.997	1	NO	reads support edit
ENST00000397746.8	0.999	0.999	1	0.998	YES
ENST00000313093.7	0.999	0.998	0.999	0.999	-
ENST00000424120.6	0.999	0.999	1	0.261	YES		YES
ENST00000504481.1	0.996	0.996	0.992	0.994	NO	liftover issue, no edit was made
ENST00000507227.1	0.996	0.996	0.992	0.99	YES
ENST00000509660.1	0.996	0.997	0.994	0.994	-
ENST00000511681.1	0.997	0.996	0.994	0.994	-
ENST00000355072.11	0.998	0.999	0.998	0.999	NO	reads support edit
HG005 haplotype 1
Transcripts	DNA Identity of Transcript in Polished Assembly Against Transcript in GRCh38	DNA Identity of Transcript in Raw Assembly Against Transcript in GRCh38	Protein Identity of Transcript in Polished Assembly Against Transcript in GRCh38	Protein Identity of Transcript in Raw Assembly Against Transcript in GRCh38	Identity improved by polishing?	If polishing decreases identity, why?	Significant impact to gene model?
ENST00000372371.8	1	0.996	1	0.259	YES		YES
ENST00000252050.9	1	0.999	1	1	-
ENST00000216281.13	0.999	0.998	1	0.998	YES
ENST00000620267.2	0.996	0.995	0.724	0.978	NO	DeepPolisher edit inserts 7 bases and is consistently supported by several reads. The edit seems to be correct in this case, despite the decrease in identity.	YES
ENST00000377939.5	1	0.998	1	0.996	YES
ENST00000367866.7	0.999	1	0.998	1	NO	Reads are noisy, causing nonsynonymous mutation
ENST00000396819.8	1	0.999	1	0.999	YES
ENST00000295910.11	0.989	0.985	0.989	0.248	YES		YES
ENST00000415041.1	0.994	0.994	0.986	0.986	-
ENST00000506414.1	0.994	0.994	0.988	0.986	YES
ENST00000316073.3	0.984	0.983	0.984	0.768	YES		YES
ENST00000295542.6	1	0.999	1	0.998	YES
HG005 haplotype 2
Transcripts	DNA Identity of Transcript in Polished Assembly Against Transcript in GRCh38	DNA Identity of Transcript in Raw Assembly Against Transcript in GRCh38	Protein Identity of Transcript in Polished Assembly Against Transcript in GRCh38	Protein Identity of Transcript in Raw Assembly Against Transcript in GRCh38	Identity improved by polishing?	If polishing decreases identity, why?	Significant impact to gene model?
ENST00000515566.1	0.992	0.992	0.986	0.988	NO	Liftover issue, no edit nearby
ENST00000507227.1	0.993	0.993	0.986	0.984	YES
ENST00000254480.10	0.999	1	1	1	-
ENST00000318562.13	0.999	1	1	1	-
ENST00000342245.9	0.993	0.999	0.993	0.998	NO	Reads are noisy, causing deletion in frame
ENST00000389039.11	0.998	0.999	0.998	0.998	-
ENST00000474796.2	0.998	0.999	0.998	1	NO	Reads are noisy, causing deletion in frame
ENST00000415858.3	1	0.998	1	1	YES
ENST00000392915.7	0.998	0.998	0.998	0.997	YES
ENST00000636930.2	0.997	0.999	0.997	1	NO	Reads are noisy, causing deletion in frame

## Sheet: 7. kmer-based stats (k31) - 40x
Assembly	Reads	Polisher	Polisher Filter	total_edits	edits_overlapping_FPkmers	WholeGenomeQV_Merqury_Hap1	WholeGenomeQV_Merqury_Hap2	WholeGenomeQV_Merqury_Dip	WholeGenomeQV_Yak_Hap1	WholeGenomeQV_Yak_Hap2	WholeGenomeQV_Yak_Dip	WholeGenomeQV_Yak_Hap1_unNormalized	WholeGenomeQV_Yak_Hap2_unNormalized	WholeGenomeQV_Yak_Dip_unNormalized	InsideConfQV_Merqury_Hap1	InsideConfQV_Merqury_Hap2	InsideConfQV_Merqury_Dip	InsideConfQV_Yak_Hap1	InsideConfQV_Yak_Hap2	InsideConfQV_Yak_Dip	InsideConfQV_Yak_Hap1_unNormalized	InsideConfQV_Yak_Hap2_unNormalized	InsideConfQV_Yak_Dip_unNormalized	OutsideConfQV_Merqury_Hap1	OutsideConfQV_Merqury_Hap2	OutsideConfQV_Merqury_Dip	OutsideConfQV_Yak_Hap1	OutsideConfQV_Yak_Hap2	OutsideConfQV_Yak_Dip_unNormalized	OutsideConfQV_Yak_Hap1_unNormalized	OutsideConfQV_Yak_Hap2_unNormalized	OutsideConfQV_Yak_Dip_unNormalized	YakSwitchError	YakHammingError	total_fp_kmers_wg	projected_fp_kmers_wg	unchanged_fp_kmers_wg	induced_fp_kmers_wg	total_fp_kmers_conf	projected_fp_kmers_conf	unchanged_fp_kmers_conf	induced_fp_kmers_conf
HG005 with hprc polishing pipeline (main fig results)
HG005 Hifiasm v0.19.5	None	Unpolished	None	NA	NA	50.6625	50.5128	50.5857	52.727	52.302	52.473	47.749	47.465	47.602	64.2199	64.4139	64.3158	64.138	64.454	64.293	60.216	60.294	60.255	42.5167	43.3391	42.9637	47.911	47.449	47.682	40.234	40.796	40.543	0.003246	0.002934	1617645	0	1617645	0	56099	0	56099	0
HG005 Hifiasm v0.19.5	HiFi DC v1.2, PHARAOH v6 (minimap2)	DeepPolisher minimap2 model 1	GQ 20 INS-1, GQ 12 DEL-1, GQ 5 all other	16376	548	50.7773	50.608	50.6903	52.913	52.443	52.634	47.813	47.516	47.659	66.0286	66.2662	66.1457	66.059	66.435	66.243	60.935	60.995	60.964	42.5755	43.3849	43.0158	48.12	47.561	47.834	40.27	40.823	40.575	0.002598	0.002464	1579137	1579137	1574857	4280	36810	31845	31168	5642
Alternate polishing methods
HG005 Hifiasm v0.19.5	HiFi DC v1.2 winnowmap 40x, ONT R9 winnowmap 40x , Illumina bwa-mem 40x	T2T pipeline	merfin -polish	38703	1524	50.6886	50.5296	50.607	52.771	52.324	52.505	47.763	47.472	47.612	64.5845	64.7116	64.6475	64.518	64.759	64.637	60.372	60.415	60.394	42.5256	43.3409	42.9691	47.947	47.453	47.699	40.237	40.797	40.546	0.003226	0.002913	1609731	1609731	1606413	3318	51974	46790	46225	5749
HG005 Hifiasm v0.19.5	HiFi DC v1.2 winnowmap 40x	DeepVariant HiFi	PASS, homalt only (-H1)	17210	4048	50.8022	50.6224	50.7098	52.953	52.466	52.664	47.823	47.521	47.667	65.7139	65.674	65.6939	65.637	65.716	65.677	60.767	60.747	60.757	42.5932	43.3842	43.0238	48.193	47.555	47.86	40.283	40.818	40.578	0.002553	0.002447	1572082	1571902	1561911	10171	40846	35787	32622	8224
HG005 Hifiasm v0.19.5	HiFi DC v1.2 winnowmap 40x	NextPolish2	None	NA	NA	50.7554	50.9269	50.8388	52.643	53.09	52.824	47.628	47.932	47.775	66.8418	67.0834	66.961	67.255	67.312	67.284	61.206	61.284	61.245	43.491	42.6904	43.1261	47.727	48.225	47.98	40.93	40.39	40.688	0.003889	0.00326	1526068	1427991	1047672	478396	30510	25731	10571	19939
Without GQ filters
HG005 Hifiasm v0.19.5	HiFi DC v1.2, PHARAOH v6 (minimap2)	DeepPolisher minimap2 model 1	None	40027	7503	50.5744	50.4159	50.4931	52.581	52.144	52.321	47.701	47.414	47.552	64.3936	64.5494	64.4708	64.349	64.589	64.467	60.321	60.378	60.35	42.407	43.235	42.857	47.544	47.169	47.362	40.16	40.731	40.475	0.002315	0.002283
HG005 hifiasm with winnowmap model
HG005 Hifiasm v0.19.5	HiFi DC v1.2, PHARAOH v5 (winnowmap)	DeepPolisher winnowmap model 5	None	32188	4755	50.6695	50.5045	50.5848	52.737	52.283	52.468	47.755	47.462	47.603	65.557	65.8136	65.6834	65.597	65.968	65.779	60.787	60.857	60.822	42.4675	43.295	42.9172	47.744	47.328	47.541	40.202	40.769	40.514	0.002235	0.002237
PHARAOH validation
HG005 Hifiasm v0.19.5	HiFi DC v1.2, minimap2 alignments only	DeepPolisher minimap2 model 1	GQ 20 INS-1, GQ 12 DEL-1, GQ 5 all other	12837	522	50.7672	50.5979	50.6802	52.9	52.426	52.618	47.808	47.511	47.654	65.8024	65.9757	65.8882	65.833	66.122	65.975	60.859	60.902	60.88	42.5732	43.3819	43.0131	48.116	47.549	47.824	40.269	40.821	40.574	0.002738	0.002593
HG005 Hifiasm v0.19.5	HiFi DC v1.2, minimap2 alignments only	DeepPolisher minimap2 model 1	None	34478	7272	50.5603	50.4035	50.4798	52.559	52.125	52.301	47.693	47.407	47.546	64.0979	64.2449	64.1708	64.048	64.273	64.159	60.197	60.253	60.224	42.4063	43.2331	42.8558	47.547	47.162	47.359	40.16	40.731	40.475	0.002586	0.002494

## Sheet: 8. kmer-based stats (k31) - all
Assembly	Reads	Polisher	Polisher Filter	total_edits	edits_overlapping_FPkmers	WholeGenomeQV_Merqury_Hap1	WholeGenomeQV_Merqury_Hap2	WholeGenomeQV_Merqury_Dip	WholeGenomeQV_Yak_Hap1	WholeGenomeQV_Yak_Hap2	WholeGenomeQV_Yak_Dip	WholeGenomeQV_Yak_Hap1_unNormalized	WholeGenomeQV_Yak_Hap2_unNormalized	WholeGenomeQV_Yak_Dip_unNormalized	InsideConfQV_Merqury_Hap1	InsideConfQV_Merqury_Hap2	InsideConfQV_Merqury_Dip	InsideConfQV_Yak_Hap1	InsideConfQV_Yak_Hap2	InsideConfQV_Yak_Dip	InsideConfQV_Yak_Hap1_unNormalized	InsideConfQV_Yak_Hap2_unNormalized	InsideConfQV_Yak_Dip_unNormalized	OutsideConfQV_Merqury_Hap1	OutsideConfQV_Merqury_Hap2	OutsideConfQV_Merqury_Dip	OutsideConfQV_Yak_Hap1	OutsideConfQV_Yak_Hap2	OutsideConfQV_Yak_Dip_unNormalized	OutsideConfQV_Yak_Hap1_unNormalized	OutsideConfQV_Yak_Hap2_unNormalized	OutsideConfQV_Yak_Dip_unNormalized	YakSwitchError	YakHammingError	fp_kmers_wg	fp_kmers_conf
HG002 and HG005 unpolished assemblies
HG005 Hifiasm v0.19.5	None	Unpolished	None	NA	NA	50.6625	50.5128	50.5857	52.727	52.302	52.473	47.749	47.465	47.602	64.2199	64.4139	64.3158	64.138	64.454	64.293	60.216	60.294	60.255	42.5167	43.3391	42.9637	47.911	47.449	47.682	40.234	40.796	40.543	0.003246	0.002934	1617645	56099
Coverage titration experiments - Sequel DCv1.2, entire PHARAOH pipeline
HG005 Hifiasm v0.19.5	HiFi DC v1.2 50x, PHARAOH v6 (minimap2)	DeepPolisher minimap2 model 1	GQ 20 INS-1, GQ 12 DEL-1, GQ 5 all other	17287	638	50.7835	50.6136	50.6963	52.919	52.452	52.641	47.816	47.519	47.663	66.0013	66.2744	66.1357	66.008	66.438	66.218	60.921	61.001	60.961	42.5842	43.3913	43.0232	48.144	47.582	47.856	40.276	40.827	40.58	0.002553	0.002434	1576987	36895
	HiFi DC v1.2 40x, PHARAOH v6 (minimap2)	DeepPolisher minimap2 model 1	GQ 20 INS-1, GQ 12 DEL-1, GQ 5 all other	16376	548	50.7773	50.608	50.6903	52.913	52.443	52.634	47.813	47.516	47.659	66.0286	66.2662	66.1457	66.059	66.435	66.243	60.935	60.995	60.964	42.5755	43.3849	43.0158	48.12	47.561	47.834	40.27	40.823	40.575	0.002598	0.002464	1579137	36810
	HiFi DC v1.2 30x, PHARAOH v6 (minimap2)	DeepPolisher minimap2 model 1	GQ 20 INS-1, GQ 12 DEL-1, GQ 5 all other	15352	547	50.7685	50.6015	50.6827	52.897	52.431	52.619	47.808	47.512	47.655	65.9199	66.1324	66.0249	65.909	66.237	66.07	60.882	60.94	60.911	42.5678	43.382	43.0106	48.089	47.554	47.818	40.266	40.821	40.572	0.002669	0.002507	1581900	37849
	HiFi DC v1.2 20x, PHARAOH v6 (minimap2)	DeepPolisher minimap2 model 1	GQ 20 INS-1, GQ 12 DEL-1, GQ 5 all other	13618	529	50.7513	50.5897	50.6683	52.871	52.414	52.599	47.798	47.506	47.647	65.6901	65.8077	65.7485	65.657	65.901	65.777	60.796	60.828	60.812	42.5567	43.3782	43.0034	48.056	47.543	47.797	40.259	40.819	40.568	0.002787	0.00258	1587154	40336
	HiFi DC v1.2 10x, PHARAOH v6 (minimap2)	DeepPolisher minimap2 model 1	GQ 20 INS-1, GQ 12 DEL-1, GQ 5 all other	9152	505	50.714	50.5532	50.6315	52.812	52.366	52.546	47.778	47.487	47.627	65.0987	65.0923	65.0955	65.046	65.203	65.124	60.582	60.573	60.578	42.5384	43.358	42.984	48.001	47.499	47.748	40.247	40.806	40.555	0.002965	0.002719	1600692	46880
Coverage titration experiments - Sequel CCS, entire PHARAOH pipeline
HG005 Hifiasm v0.19.5	HiFi Sequel CCS 50x , PHARAOH v6 (minimap2) with 40x UL	DeepPolisher minimap2 model 1	GQ 20 INS-1, GQ 12 DEL-1, GQ 5 all other	18730	1366	50.7431	50.5883	50.6636	52.858	52.409	52.59	47.796	47.506	47.646	65.6718	65.8983	65.7836	65.696	66.032	65.861	60.817	60.871	60.844	42.5454	43.3712	42.9943	48.028	47.518	47.769	40.252	40.815	40.562	0.00267	0.002522	1588878	40011
	HiFi Sequel CCS 40x , PHARAOH v6 (minimap2) with 40x UL	DeepPolisher minimap2 model 1	GQ 20 INS-1, GQ 12 DEL-1, GQ 5 all other	18728	1379	50.7422	50.5855	50.6618	52.855	52.406	52.587	47.795	47.505	47.645	65.5951	65.8704	65.7305	65.609	66.005	65.803	60.786	60.863	60.825	42.5487	43.3695	42.995	48.03	47.514	47.768	40.254	40.814	40.563	0.002685	0.002534	1589555	40503
	HiFi Sequel CCS 30x , PHARAOH v6 (minimap2) with 40x UL	DeepPolisher minimap2 model 1	GQ 20 INS-1, GQ 12 DEL-1, GQ 5 all other	17324	1361	50.7322	50.5761	50.6521	52.835	52.393	52.571	47.789	47.5	47.639	65.4211	65.686	65.5516	65.414	65.786	65.596	60.718	60.796	60.757	42.5452	43.3631	42.9899	48.003	47.509	47.755	40.252	40.811	40.56	0.002741	0.002567	1593100	42207
	HiFi Sequel CCS 20x , PHARAOH v6 (minimap2) with 40x UL	DeepPolisher minimap2 model 1	GQ 20 INS-1, GQ 12 DEL-1, GQ 5 all other	16574	1246	50.7222	50.5621	50.64	52.824	52.372	52.554	47.783	47.492	47.632	65.2244	65.1832	65.2038	65.212	65.279	65.245	60.644	60.621	60.632	42.5406	43.3623	42.9873	47.999	47.5	47.747	40.249	40.809	40.558	0.002786	0.002586	1597547	45726
	HiFi Sequel CCS 10x , PHARAOH v6 (minimap2) with 40x UL	DeepPolisher minimap2 model 1	GQ 20 INS-1, GQ 12 DEL-1, GQ 5 all other	12157	1595	50.655	50.5063	50.5787	52.71	52.291	52.459	47.747	47.464	47.6	63.9519	64.1242	64.0371	63.878	64.191	64.032	60.123	60.209	60.166	42.5197	43.3393	42.9652	47.913	47.448	47.681	40.237	40.796	40.545	0.002985	0.002728	1620243	59817

## Sheet: 9. HPRC samples deepvariant
sampleID	Assembly	Polisher	total_edits	edits_overlapping_FPkmers	WholeGenomeQV_Merqury_Hap1	WholeGenomeQV_Merqury_Hap2	WholeGenomeQV_Merqury_Dip	WholeGenomeQV_Yak_Hap1	WholeGenomeQV_Yak_Hap2	WholeGenomeQV_Yak_Dip	WholeGenomeQV_Yak_Hap1_unNormalized	WholeGenomeQV_Yak_Hap2_unNormalized	WholeGenomeQV_Yak_Dip_unNormalized	InsideConfQV_Merqury_Hap1	InsideConfQV_Merqury_Hap2	InsideConfQV_Merqury_Dip	InsideConfQV_Yak_Hap1	InsideConfQV_Yak_Hap2	InsideConfQV_Yak_Dip	InsideConfQV_Yak_Hap1_unNormalized	InsideConfQV_Yak_Hap2_unNormalized	InsideConfQV_Yak_Dip_unNormalized	OutsideConfQV_Merqury_Hap1	OutsideConfQV_Merqury_Hap2	OutsideConfQV_Merqury_Dip	OutsideConfQV_Yak_Hap1	OutsideConfQV_Yak_Hap2	OutsideConfQV_Yak_Dip_unNormalized	OutsideConfQV_Yak_Hap1_unNormalized	OutsideConfQV_Yak_Hap2_unNormalized	OutsideConfQV_Yak_Dip_unNormalized	YakSwitchError	YakHammingError
HG03834	raw	Unpolished	NA	NA	56.1433	56.4879	56.3122	57.445	58.2	57.803	53.713	53.957	53.833	65.9132	65.5885	65.7479	63.692	63.701	63.696	63.525	63.464	63.495	49.6605	50.1746	49.9094	52.697	54.654	53.551	47.023	47.357	47.187	0.007415	0.006591
HG03834	polished	DeepVariant	34432	2354	56.5401	56.8887	56.7108	57.98	58.794	58.365	53.958	54.198	54.076	68.4757	67.8039	68.1269	65.228	65.092	65.159	65.11	64.883	64.995	49.941	50.4378	50.1819	53.28	55.495	54.23	47.177	47.501	47.336	0.006558	0.0059
HG03834	polished	DeepPolisher	13647	380	56.6453	57.0004	56.8192	58.057	58.823	58.42	54.076	54.314	54.194	70.5619	69.6523	70.0834	66.663	66.402	66.53	66.95	66.613	66.778	49.9583	50.4663	50.2045	53.294	55.51	54.244	47.203	47.529	47.362	0.006878	0.006112	1	2
HG03834	polished	DeepPolisher no filter	32578	4420	56.2987	56.6439	56.47	57.548	58.288	57.899	53.862	54.103	53.981	67.8939	67.3752	67.63	65.281	65.173	65.226	65.512	65.333	65.421	49.7116	50.2152	49.9558	52.745	54.751	53.617	47.052	47.383	47.214	0.006459	0.005837
HG02258	raw	Unpolished	NA	NA	55.7181	55.9855	55.852	58.911	58.052	58.471	54.297	53.351	53.79	68.3229	67.8998	68.1062	64.418	64.198	64.307	66.509	66.236	66.37	49.5715	49.6028	49.589	55.828	55.31	56.361	46.864	46.57	46.697	0.003929	0.003475
HG02258	polished	DeepVariant	22243	1459	55.8942	56.2182	56.0559	59.26	58.44	58.843	54.43	53.485	53.924	71.3849	70.8071	71.0864	65.469	65.317	65.392	68.455	68.244	68.348	49.6715	49.7333	49.706	56.265	55.842	56.967	46.917	46.635	46.757	0.00374	0.003335
HG02258	polished	DeepPolisher	6180	235	55.9329	56.2244	56.0787	59.323	58.426	58.863	54.474	53.498	53.95	72.8661	71.88	72.3452	65.925	65.688	65.805	69.569	69.119	69.338	49.684	49.7265	49.7077	56.369	55.771	56.963	46.93	46.637	46.764	0.003803	0.003379	1	2
HG02258	polished	DeepPolisher no filter	23251	4520	55.5499	55.8213	55.6858	58.51	57.745	58.12	54.166	53.253	53.678	68.4225	68.2728	68.347	64.532	64.446	64.489	66.831	66.727	66.779	49.2809	49.3803	49.3362	54.719	54.478	55.243	46.681	46.439	46.544	0.003799	0.003365
HG02129	raw	Unpolished	NA	NA	57.5863	57.5363	57.561	60.163	59.424	59.772	55.03	54.812	54.918	67.0733	67.6924	67.3717	63.923	64.207	64.062	66.33	66.9	66.606	50.22	50.9686	50.6219	56.021	54.998	56.115	47.293	47.861	47.6	0.005611	0.004964
HG02129	polished	DeepVariant	36700	2999	57.9719	57.903	57.9369	60.939	60.017	60.445	55.229	54.992	55.108	69.8602	70.7902	70.3002	65.061	65.328	65.192	68.562	69.284	68.908	50.429	51.1557	50.8196	56.991	55.508	56.934	47.385	47.937	47.685	0.004909	0.00438
HG02129	polished	DeepPolisher	14051	451	58.0935	58.0276	58.06	61.15	60.213	60.646	55.314	55.079	55.193	70.3925	71.7669	71.0254	65.253	65.632	65.437	69.014	70.092	69.52	50.5359	51.2752	50.9331	57.43	55.792	57.328	47.458	48.015	47.76	0.005122	0.004516	1	2
HG02129	polished	DeepPolisher no filter	49415	9307	57.2338	57.1867	57.21	59.56	58.862	59.19	54.744	54.536	54.638	67.0421	67.5548	67.29	63.78	64.015	63.896	66.069	66.528	66.292	49.752	50.5249	50.1665	54.505	53.941	54.718	46.963	47.555	47.284	0.005082	0.004474
HG02056	raw	Unpolished	NA	NA	55.998	55.4937	55.7358	58.741	57.295	57.875	54.626	54.02	54.309	66.3517	66.4454	66.3983	63.488	63.637	63.561	64.902	65.176	65.037	49.7388	49.7528	49.7465	54.679	52.024	53.029	47.163	47.249	47.21	0.004272	0.003933
HG02056	polished	DeepVariant	66570	11269	55.8152	55.3001	55.5472	58.41	56.943	57.531	54.398	53.794	54.082	67.686	67.5223	67.6034	64.143	64.125	64.133	65.851	65.954	65.902	49.285	49.3338	49.3117	53.452	51.301	52.152	46.791	46.902	46.852	0.004159	0.003751
HG02056	polished	DeepPolisher	14655	972	56.3534	55.7932	56.0613	59.391	57.738	58.395	54.926	54.268	54.581	70.2838	70.0871	70.1843	65.477	65.482	65.478	68.287	68.464	68.375	49.9574	49.9308	49.9428	55.388	52.343	53.467	47.284	47.355	47.323	0.003955	0.003656	1	2
HG02056	polished	DeepPolisher no filter	125686	43385	53.5377	53.1918	53.36	54.807	53.981	54.324	52.413	51.998	52.198	60.2298	60.0387	60.13	59.106	58.959	59.032	59.569	59.43	59.499	47.0806	47.3412	47.2216	49.125	48.358	48.688	45.171	45.446	45.319	0.005323	0.004419
HG02015	raw	Unpolished	NA	NA	56.3764	56.0688	56.2165	57.644	56.703	57.101	54.139	53.842	53.985	66.4343	66.5128	66.4734	63.597	63.517	63.557	65.303	65.125	65.213	48.7765	49.3457	49.0921	51.748	50.68	51.213	46.273	46.899	46.619	0.005214	0.004341
HG02015	polished	DeepVariant	34414	2145	56.7475	56.3829	56.5574	58.14	57.076	57.525	54.37	54.042	54.199	68.0683	68.473	68.2659	64.443	64.456	64.449	66.678	66.624	66.651	49.0656	49.5464	49.3334	52.325	50.979	51.626	46.437	47.019	46.759	0.004516	0.003788
HG02015	polished	DeepPolisher	13969	415	56.8468	56.485	56.6582	58.233	57.168	57.616	54.459	54.131	54.288	70.0804	70.9223	70.4808	65.43	65.533	65.481	68.75	68.906	68.827	49.0787	49.5368	49.3342	52.363	50.944	51.613	46.451	47.017	46.764	0.004755	0.003953	1	2
HG02015	polished	DeepPolisher no filter	29035	3849	56.4633	56.1723	56.31	57.689	56.792	57.171	54.216	53.935	54.07	66.8363	67.6811	67.24	63.999	64.288	64.141	66.113	66.55	66.326	48.8623	49.3465	49.1319	51.886	50.679	51.266	46.314	46.9	46.638	0.004387	0.003716
HG01975	raw	Unpolished	NA	NA	56.114	56.1758	56.1449	57.776	58.094	57.932	54.218	54.252	54.235	65.9199	67.2574	66.5372	64.272	65.079	64.655	65.442	66.419	65.903	49.6085	49.8233	49.7151	52.153	52.838	52.483	47.481	47.663	47.571	0.008519	0.007736
HG01975	polished	DeepVariant	35317	2824	56.2946	56.3514	56.323	58.016	58.346	58.178	54.329	54.363	54.346	66.2088	67.7385	66.9065	64.436	65.368	64.875	65.669	66.836	66.213	49.7958	49.9886	49.8916	52.461	53.16	52.797	47.591	47.761	47.676	0.007592	0.006766
HG01975	polished	DeepPolisher	14738	473	56.4959	56.549	56.5224	58.323	58.664	58.49	54.476	54.505	54.49	68.6594	71.302	69.7824	66.065	67.242	66.611	68.035	69.83	68.84	49.8522	50.0662	49.9584	52.603	53.332	52.953	47.634	47.819	47.726	0.007982	0.007053	1	2
HG01975	polished	DeepPolisher no filter	28647	3790	56.1508	56.1943	56.17	57.789	58.089	57.936	54.236	54.262	54.249	65.8015	66.8736	66.3	64.171	64.865	64.502	65.337	66.162	65.73	49.6757	49.8823	49.7783	52.26	52.946	52.591	47.514	47.694	47.604	0.007431	0.006671
HG01261	raw	Unpolished	NA	NA	55.6691	54.9632	55.2943	56.795	55.639	56.138	53.529	52.942	53.22	66.1839	66.0213	66.1018	63.478	63.336	63.406	65.061	64.956	65.008	48.1951	48.5801	48.41	51.141	50.196	50.666	45.798	46.269	46.06	0.003781	0.0038
HG01261	polished	DeepVariant	38452	5141	55.8029	55.0737	55.4153	56.963	55.773	56.286	53.591	52.993	53.275	68.5946	68.4284	68.5107	64.65	64.54	64.594	66.883	66.835	66.859	48.1574	48.5432	48.3727	51.064	50.144	50.606	45.749	46.222	46.012	0.003524	0.003575
HG01261	polished	DeepPolisher	10718	512	56.0429	55.2718	55.6321	57.301	56.018	56.567	53.774	53.153	53.446	70.943	70.4269	70.6773	65.641	65.411	65.523	68.729	68.507	68.617	48.355	48.7255	48.562	51.463	50.409	50.923	45.896	46.361	46.154	0.00351	0.003575	1	2
HG01192	raw	Unpolished	NA	NA	54.6439	54.2655	54.4468	55.802	54.904	55.253	52.175	51.705	51.929	66.294	66.4686	66.3804	63.374	63.658	63.513	63.746	63.888	63.817	46.8854	47.6108	47.2818	50.595	49.156	49.529	44.282	44.87	44.606	0.004731	0.004427
HG01192	polished	DeepVariant	29306	2540	54.7966	54.4247	54.603	56.001	55.083	55.438	52.266	51.796	52.02	68.0555	68.871	68.4441	64.273	64.809	64.532	64.786	65.201	64.989	46.9559	47.6714	47.347	50.77	49.247	49.645	44.32	44.898	44.638	0.004298	0.004086
HG01192	polished	DeepPolisher	10032	387	54.8813	54.4986	54.682	56.103	55.162	55.527	52.337	51.854	52.084	69.7001	70.8055	70.2176	65.119	65.61	65.356	65.922	66.303	66.108	46.9866	47.7137	47.3838	50.841	49.311	49.708	44.343	44.928	44.665	0.004436	0.004175	1	2
HG01192	polished	DeepPolisher no filter	33305	6342	54.522	54.1607	54.33	55.61	54.742	55.08	52.106	51.644	51.864	66.8071	67.4365	67.11	63.782	64.207	63.989	64.357	64.705	64.527	46.6947	47.4153	47.0885	50.178	48.86	49.2	44.157	44.746	44.481	0.004341	0.004102
HG00597	raw	Unpolished	NA	NA	55.2769	55.7019	55.4849	56.366	56.783	56.57	53.504	53.736	53.619	66.5856	67.0126	66.7938	64.565	64.87	64.715	65.23	65.557	65.39	48.9628	49.2595	49.1101	50.932	51.472	51.197	46.794	47.104	46.948	0.007077	0.007865
HG00597	polished	DeepVariant	40221	3583	55.5569	55.9624	55.8421	56.726	57.13	56.924	53.684	53.891	53.787	69.5058	70.0246	69.7574	66.255	66.529	66.39	67.36	67.633	67.494	49.1255	49.4144	49.269	51.218	51.764	51.486	46.878	47.181	47.029	0.006083	0.006962
HG00597	polished	DeepPolisher	15377	626	55.6468	56.0452	55.8421	56.84	57.221	57.027	53.771	53.974	53.872	71.0958	71.015	71.0552	67.15	67.145	67.147	68.631	68.562	68.596	49.194	49.4923	49.342	51.318	51.883	51.595	46.941	47.252	47.095	0.006346	0.00715	1	2
HG00597	polished	DeepPolisher no filter	57700	12552	54.8065	55.1353	54.97	55.728	56.025	55.875	53.113	53.283	53.198	65.2629	65.2279	65.25	63.646	63.58	63.613	64.212	64.118	64.165	48.4537	48.734	48.5929	50.146	50.637	50.388	46.391	46.683	46.536	0.006387	0.007113
HG00408	raw	Unpolished	NA	NA	55.1717	55.7298	55.4409	56.219	56.808	56.503	53.363	53.745	53.549	66.3418	65.9415	66.1371	64.237	63.943	64.088	64.706	64.415	64.558	48.7762	49.1022	48.9338	50.835	51.184	51.003	46.815	46.946	46.879	0.007557	0.008158
HG00408	polished	DeepVariant	47696	2959	55.5235	56.1231	55.8119	56.658	57.318	56.975	53.591	53.99	53.785	69.9271	69.4466	69.6802	66.153	65.863	66.006	66.957	66.663	66.808	49.0004	49.3155	49.1528	51.184	51.556	51.363	46.946	47.071	47.007	0.006356	0.007195
HG00408	polished	DeepPolisher	15958	624	55.5255	56.1093	55.8066	56.614	57.258	56.923	53.625	54.016	53.815	70.239	69.3047	69.7468	66.518	66.048	66.277	67.624	67.078	67.342	49.0038	49.3113	49.1525	51.154	51.526	51.333	46.968	47.085	47.025	0.006762	0.007486	1	2
HG00408	polished	DeepPolisher no filter	58982	13819	54.6678	55.1564	54.9	55.516	56.024	55.762	52.941	53.28	53.107	64.7129	64.6877	64.7	63.077	63.044	63.061	63.522	63.501	63.512	48.2997	48.5301	48.4117	50.071	50.308	50.186	46.404	46.482	46.442	0.006965	0.007543

## Sheet: 10. QV experiments
Assembly	Reads	Polisher	Polisher Filter	QV kmer size	QV reads used	total_edits	edits_overlapping_FPkmers	Errors / Mb from GIAB variants (confidence regions)	Errors / Mb from Merqury QV (diploid, confidence regions)	Errors / Mb from Merqury QV (diploid, whole genome)	WholeGenomeQV_Merqury_Hap1	WholeGenomeQV_Merqury_Hap2	WholeGenomeQV_Merqury_Dip	WholeGenomeQV_Yak_Hap1	WholeGenomeQV_Yak_Hap2	WholeGenomeQV_Yak_Dip	WholeGenomeQV_Yak_Hap1_unNormalized	WholeGenomeQV_Yak_Hap2_unNormalized	WholeGenomeQV_Yak_Dip_unNormalized	InsideConfQV_Merqury_Hap1	InsideConfQV_Merqury_Hap2	InsideConfQV_Merqury_Dip	InsideConfQV_Yak_Hap1	InsideConfQV_Yak_Hap2	InsideConfQV_Yak_Dip	InsideConfQV_Yak_Hap1_unNormalized	InsideConfQV_Yak_Hap2_unNormalized	InsideConfQV_Yak_Dip_unNormalized	OutsideConfQV_Merqury_Hap1	OutsideConfQV_Merqury_Hap2	OutsideConfQV_Merqury_Dip	OutsideConfQV_Yak_Hap1	OutsideConfQV_Yak_Hap2	OutsideConfQV_Yak_Dip_unNormalized	OutsideConfQV_Yak_Hap1_unNormalized	OutsideConfQV_Yak_Hap2_unNormalized	OutsideConfQV_Yak_Dip_unNormalized
HG005 Hifiasm v0.19.5	None	Unpolished	None	31	illumina	NA	NA	8.14	0.370186	8.73836	50.6625	50.5128	50.5857	52.727	52.302	52.473	47.749	47.465	47.602	64.2199	64.4139	64.3158	64.138	64.454	64.293	60.216	60.294	60.255	42.5167	43.3391	42.9637	47.911	47.449	47.682	40.234	40.796	40.543
HG005 Hifiasm v0.19.5	HiFi DC v1.2, PHARAOH v6 (minimap2)	DeepPolisher minimap2 model 1	GQ 20 INS-1, GQ 12 DEL-1, GQ 5 all other	31	illumina	16376	548	4.72	0.242901	8.53041	50.7773	50.608	50.6903	52.913	52.443	52.634	47.813	47.516	47.659	66.0286	66.2662	66.1457	66.059	66.435	66.243	60.935	60.995	60.964	42.5755	43.3849	43.0158	48.12	47.561	47.834	40.27	40.823	40.575
HG005 Hifiasm v0.19.5	None	Unpolished	None	21	illumina	NA	NA	8.14	0.257745	3.36643	54.8812	54.5855	54.7283	57.323	56.152	56.548	51.293	50.875	51.075	65.7979	65.9802	65.8881	61.922	62.062	61.991	62.172	62.253	62.212	47.0096	47.5972	47.3323	43.655	51.62	53.462	43.655	44.07	43.885
HG005 Hifiasm v0.19.5	HiFi DC v1.2, PHARAOH v6 (minimap2)	DeepPolisher minimap2 model 1	GQ 20 INS-1, GQ 12 DEL-1, GQ 5 all other	21	illumina	16376	221	4.72	0.16118	3.22924	55.0834	54.747	54.909	57.674	56.379	56.819	51.393	50.953	51.164	67.8321	68.0239	67.9269	62.727	62.849	62.788	63.086	63.137	63.111	47.1035	47.6668	47.4133	43.703	51.774	53.771	43.703	44.105	43.926
HG005 Hifiasm v0.19.5	None	Unpolished	None	31	Hybrid (HiFi + ilm)	NA	NA	8.14	0.200549	0.811391	61.2127	60.6323	60.9077	NA	NA	NA	NA	NA	NA	66.8997	67.0574	66.9778	NA	NA	NA	NA	NA	NA	55.4276	55.2456	55.3235	NA	NA	NA	NA	NA	NA
HG005 Hifiasm v0.19.5	HiFi DC v1.2, PHARAOH v6 (minimap2)	DeepPolisher minimap2 model 1	GQ 20 INS-1, GQ 12 DEL-1, GQ 5 all other	31	Hybrid (HiFi + ilm)	16376	298	4.72	0.0915904	0.640118	62.4196	61.5177	61.9374	NA	NA	NA	NA	NA	NA	70.2868	70.4783	70.3815	NA	NA	NA	NA	NA	NA	56.4633	55.837	56.0972	NA	NA	NA	NA	NA	NA
HG005 Hifiasm v0.19.5	None	Unpolished	None	21	Hybrid (HiFi + ilm)	NA	NA	8.14	0.157482	0.531851	63.233	62.3156	62.7421	NA	NA	NA	NA	NA	NA	67.9551	68.1016	68.0277	NA	NA	NA	NA	NA	NA	57.9169	57.1785	57.4838	NA	NA	NA	NA	NA	NA
HG005 Hifiasm v0.19.5	HiFi DC v1.2, PHARAOH v6 (minimap2)	DeepPolisher minimap2 model 1	GQ 20 INS-1, GQ 12 DEL-1, GQ 5 all other	21	Hybrid (HiFi + ilm)	16376	165	4.72	0.0731375	0.413	64.5896	63.2223	63.8405	NA	NA	NA	NA	NA	NA	71.2889	71.4294	71.3586	NA	NA	NA	NA	NA	NA	59.0529	57.7476	58.2668	NA	NA	NA	NA	NA	NA
HG005 Hifiasm v0.19.5	None	Unpolished	None	31	element	NA	NA	8.14	1.02672	16.9789	47.8135	47.5949	47.7009	51.384	50.573	50.987	45.489	45.187	45.332	59.8456	59.9257	59.8855	69.239	71.205	70.111	55.377	55.402	55.39	39.8196	40.5478	40.2174	48.752	46.992	48.842	38.333	38.866	38.627
HG005 Hifiasm v0.19.5	HiFi DC v1.2, PHARAOH v6 (minimap2)	DeepPolisher minimap2 model 1	GQ 20 INS-1, GQ 12 DEL-1, GQ 5 all other	31	element	16376	688	4.72	0.898421	16.7633	47.8746	47.6452	47.7564	51.518	50.671	51.103	45.526	45.217	45.366	60.4307	60.4999	60.4652	55.592	55.607	55.599	55.592	55.607	55.599	39.8496	40.5742	40.2456	49.024	47.125	49.077	38.354	38.884	38.647
HG005 Hifiasm v0.19.5	None	Unpolished	None	21	element	NA	NA	8.14	0.706269	8.97532	50.5402	50.4024	50.4695	55.361	54.57	55.075	47.841	47.582	47.707	61.4771	61.5438	61.5103	66.72	67.445	67.067	57.179	57.202	57.191	42.6386	43.4024	43.0543	59.082	52.738	63.821	40.617	41.158	40.915
HG005 Hifiasm v0.19.5	HiFi DC v1.2, PHARAOH v6 (minimap2)	DeepPolisher minimap2 model 1	GQ 20 INS-1, GQ 12 DEL-1, GQ 5 all other	21	element	16376	297	4.72	0.605494	8.82308	50.6207	50.4709	50.5438	55.59	54.74	55.277	47.887	47.62	47.749	62.1512	62.2069	62.1789	69.462	70.721	70.046	57.439	57.452	57.445	42.677	43.4356	43.0899	61.339	53.042	40.938	40.642	41.179	40.938
	GIAB estimated QV
	50.8938	51.6368
	53.2606	52.993

[truncated: 6 more sheets: 11. Manual investigation of GIA, 12. HG005 annotating unchanged , 13. HPRC release 2, 14. Marmoset polishing, 15. element polishing, 16. GQ optimization]
